# Supplementary material for: Enantioselective synthesis of tetrahydrofuran spirooxindoles via domino oxa-Michael/Michael addition reaction using a bifunctional squaramide catalyst
Source: Royal Society of Chemistry journal article supplement (doi:10.1039/d2ob00633b), 2022-01-01
Supplement: d2ob00633b1.pdf [file d2ob00633b1.pdf]

# Enantioselective Synthesis of Tetrahydrofuran Spirooxindoles via Domino Oxa-Michael/Michael Addition Reaction using a Bifunctional Squaramide Catalyst

Khyati Shukla,<sup>a</sup> Khushboo,<sup>a</sup> Pratibha Mahto,<sup>a</sup> Vinod K. Singh<sup>\*a</sup>

Department of Chemistry, Indian Institute of Technology Kanpur, Kanpur-208 016, India<sup>†</sup>

\*E-mail: [vinodks@iitk.ac.in](mailto:vinodks@iitk.ac.in)

## Supplementary Material

### Table of Contents

|                                                  |         |
|--------------------------------------------------|---------|
| General Methods.....                             | S2      |
| Optimization Table and Experimental Details..... | S2-S3   |
| Characterization Data of Compounds .....         | S3-S10  |
| References.....                                  | S11     |
| Copies of NMR Spectra .....                      | S12-S38 |
| Copies of HPLC Chromatogram .....                | S39-S64 |
| Figure S-1: X-ray Structure of 3ia .....         | S65     |

## General Methods

All reactions were carried out in a closed vial.  $^1\text{H}$  NMR spectra (400 or 500 MHz) and  $^{13}\text{C}$  NMR spectra (100 or 125 MHz) were recorded using acetone- $d_6$  and  $\text{CDCl}_3$  as the solvent, crude was recorded using  $\text{DMSO}-d_6$ , unless specified. TLC was performed with silica gel GF254 precoated on aluminium plates and spots were visualized with UV. Flash column chromatography was performed on silica gel. IR spectra were recorded on an FT-IR spectrometer, and only major peaks were reported in  $\text{cm}^{-1}$ . High-resolution mass spectra (HRMS) were obtained by the ESI-TOF method. Melting points were recorded on a digital melting point apparatus and are uncorrected. The enantiomeric ratio was determined by chiral HPLC analysis with Chiralpak IA3 column. Substrates **1**<sup>1</sup> and **2**<sup>2</sup> were prepared following known procedures. Catalysts **I** was commercially available. Catalysts **II-XII** were synthesized following reported methods.<sup>3</sup> All the other reagents were purchased from commercial sources and used as received unless specified.

## Optimization Table and Experimental Details

**Table S1.** Selected entries for solvent screening<sup>a</sup>

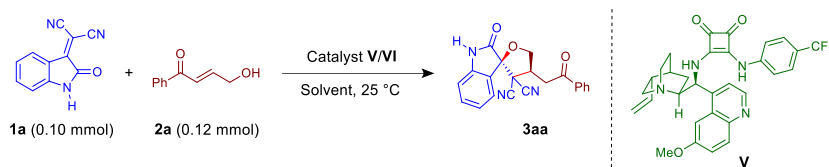

| Entry | Solvent          | Cat.     | Time | Yield <sup>b</sup> | dr <sup>c</sup> | ee <sup>d</sup> |
|-------|------------------|----------|------|--------------------|-----------------|-----------------|
| 1     | Xylene           | <b>V</b> | 48   | 85                 | 7:1             | 64              |
| 2     | Mesitylene       | <b>V</b> | 48   | 83                 | 7:1             | 64              |
| 3     | Nitrobenzene     | <b>V</b> | 12   | 85                 | 5:1             | 39              |
| 4     | Chlorobenzene    | <b>V</b> | 12   | 82                 | 7:1             | 52              |
| 5     | Trifluorotoluene | <b>V</b> | 12   | 81                 | 7:1             | 54              |
| 6     | <i>m</i> -Xylene | <b>V</b> | 48   | 85                 | 7:1             | 68              |
| 7     | <i>p</i> -Xylene | <b>V</b> | 48   | 83                 | 6:1             | 51              |
| 8     | Anisole          | <b>V</b> | 40   | 71                 | 7:1             | 63              |

<sup>a</sup>Reaction conditions: **1a** (0.10 mmol), **2a** (0.12 mmol), catalyst (0.01 mmol), solvent (1 mL), 25 °C, unless specified.

<sup>b</sup>Calculated yield using internal standard (major diastereomer).

<sup>c</sup>Determined by  $^1\text{H}$  NMR analysis of the crude reaction mixture.

<sup>d</sup>Determined by chiral HPLC analysis (major diastereomer).

**General procedure for Enantioselective Synthesis of Tetrahydrofuran Spirooxindoles:** To a vial were added the chiral catalyst (0.01 mmol, 10 mol %), and Isatylidene Malononitriles **2** (0.10 mmol) in 1 mL Benzene.  $\gamma$ -Hydroxyenones (0.12 mmol) was then added and the mixture was stirred at 25 °C for the time as specified in Table. Upon the completion of the reaction (monitored by TLC), the diastereomeric ratio was determined by the  $^1\text{H}$  NMR analysis of the crude product. Then the solvent was evaporated off and the crude product **3** was purified by flash column chromatography over silica gel (eluent: EtOAc/hexane = 1:4). Enantiomeric ratio was determined by chiral HPLC analysis.

**Procedure for gram-scale reaction:** To a round bottom flask was added the chiral catalyst **VI** (0.05 mmol, 10 mol %), and Isatylidene Malononitriles **2** (0.50 mmol) in 5 mL Benzene.  $\gamma$ -Hydroxyenones (0.60 mmol) was then added and the mixture was stirred at 25 °C overnight. Upon the completion of the reaction (monitored by TLC), the diastereomeric ratio was determined by the  $^1\text{H}$  NMR analysis of the crude product. Then the solvent

was evaporated off and the crude product **3** was purified by flash column chromatography over silica gel (eluent: EtOAc/hexane = 1:4). 84% yield.

**Procedure for Synthetic transformation reaction:** To an oven dried round bottom flask cooled under hydrogen, diastereomeric pure compound **3aa** was taken, dissolved in dry methanol, and was cooled to 0 °C under inert atmosphere. To the solution, Sodium borohydride was added slowly, and the reaction mixture was allowed to stir at 0 °C for 30 mins. After the reaction was completed (monitored by TLC), reaction mixture was quenched with water and organic layer was separated. crude product **4aa** was purified by flash column chromatography over silica gel (eluent: EtOAc/hexane = 1:3)

## Characterization Data of Compounds

### **3aa:(2R,4S)-2'-oxo-4-(2-oxo-2-phenylethyl)-4,5-dihydro-3H-spiro[furan-2,3'-indoline]-3,3-dicarbonitrile**

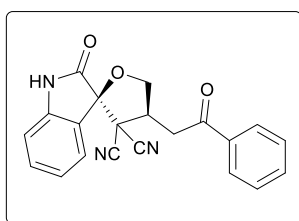

The compound **3aa** was isolated as white solid; in 88% (62.9 mg) yield, 80% ee and 9:1 dr, mp 234-236 °C;  $[\alpha]_D^{25} = -48.4$  (c 0.0025, MeOH). The enantiomeric ratio was determined by chiral HPLC using Daicel Chiralpak IA-3 column, n-hexane/2-propanol (80:20) as eluent, flow rate = 0.9 mL/min,  $\lambda = 254$  nm.  $t_R(\text{major}) = 15.591$  min,  $t_R(\text{minor}) = 44.600$  min.  $^1\text{H NMR}$  (400 MHz, ACETONE- $D_6$ )  $\delta$  10.03 (s, 1H), 8.22 – 8.07 (m, 2H), 7.77 – 7.63 (m, 2H), 7.58 (t,  $J = 7.7$  Hz, 2H), 7.51 (td,  $J = 7.9, 1.0$  Hz, 1H), 7.22 (dd,  $J = 8.0, 7.1$  Hz, 1H), 7.10 (d,  $J = 7.8$  Hz, 1H), 4.99 (t,  $J = 8.8$  Hz, 1H), 4.56 (qd,  $J = 8.6, 5.9$  Hz, 1H), 4.23 (t,  $J = 8.6$  Hz, 1H), 3.98 (dd,  $J = 18.2, 5.7$  Hz, 1H), 3.78 (dd,  $J = 18.3, 8.6$  Hz, 1H).  $^{13}\text{C NMR}$  (500 MHz,  $\delta$ ) 197.27, 174.43, 143.93, 137.11, 134.51, 133.46, 129.66, 129.11, 127.21, 123.86, 122.42, 113.10, 112.39, 111.89, 87.69, 73.51, 47.87, 43.36, 40.10.  $\nu_{\text{max}}$  (neat,  $\text{cm}^{-1}$ ): 3261, 2910, 1743, 1667, 1622, 1595, 1471, 1444, 1402, 1372, 1328, 1279, 1204, 1128, 1081; Exact mass calculated for  $[\text{C}_{21}\text{H}_{15}\text{N}_3\text{O}_3\text{Na}]^+$   $[\text{M}+\text{Na}]^+$ : 380.1006, Found: 380.0998.

### **3ab:(2R,4S)-4-(2-(4-fluorophenyl)-2-oxoethyl)-2'-oxo-4,5-dihydro-3H-spiro[furan-2,3'-indoline]-3,3-dicarbonitrile**

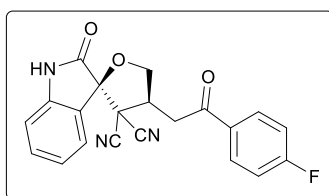

The compound **3ab** was isolated as white solid; in 76% (57.1 mg) yield, 80% ee and 6:1 dr, mp 178-180 °C;  $[\alpha]_D^{25} = -48$  (c 0.005, MeOH). The enantiomeric ratio was determined by chiral HPLC using Daicel Chiralpak IA-3 column, n-hexane/2-propanol (80:20) as eluent, flow rate = 0.9 mL/min,  $\lambda = 254$  nm.  $t_R(\text{major}) = 16.027$  min,  $t_R(\text{minor}) = 59.406$  min.  $^1\text{H NMR}$  (400 MHz, ACETONE- $D_6$ )  $\delta$  10.04 (s, 1H), 8.29 – 8.16 (m, 2H), 7.71 (d,  $J = 7.7$  Hz, 1H), 7.51 (td,  $J = 7.7, 1.0$  Hz, 1H), 7.33 (t,  $J = 8.8$  Hz, 2H), 7.22 (dd,  $J = 11.6, 4.4$  Hz, 1H), 7.10 (d,  $J = 7.9$  Hz, 1H), 4.99 (t,  $J = 8.8$  Hz, 1H), 4.55 (qd,  $J = 8.6, 5.7$  Hz, 1H), 4.23 (t,  $J = 8.6$  Hz, 1H), 3.98 (dd,  $J = 18.2, 5.8$  Hz, 1H), 3.77 (dd,  $J = 18.3, 8.6$  Hz, 1H).  $^{13}\text{C NMR}$  (400 MHz, ACETONE- $D_6$ )  $\delta$  195.86, 174.38, 168.07, 165.55, 143.87, 133.76, 133.45, 132.14, 132.04, 127.17, 123.83, 122.35, 116.66, 116.44, 113.04, 112.32, 111.86, 87.62, 73.44, 47.79, 43.30, 40.01.  $\nu_{\text{max}}$  (neat,  $\text{cm}^{-1}$ ): 2923, 2853, 1737, 1688, 1622, 1598, 1471, 1377, 1275, 1260, 1226, 1158; Exact mass calculated for  $[\text{C}_{21}\text{H}_{14}\text{FN}_3\text{O}_3\text{Na}]^+$   $[\text{M}+\text{Na}]^+$ : 398.0911, Found: 398.0907.

### **3ac:(2R,4S)-4-(2-(4-chlorophenyl)-2-oxoethyl)-2'-oxo-4,5-dihydro-3H-spiro[furan-2,3'-indoline]-3,3-dicarbonitrile**

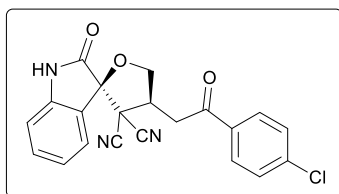

The compound **3ac** was isolated as white solid; in 74% (58.0 mg) yield, 73% ee and 7:1 dr, mp 210-212 °C;  $[\alpha]_D^{25} = -62$  (c 0.005, MeOH). The enantiomeric ratio was determined by chiral HPLC using Daicel Chiralpak IA-3 column, n-hexane/2-propanol (80:20) as eluent, flow rate = 0.9 mL/min,  $\lambda = 254$  nm.  $t_R(\text{major}) = 16.881$  min,  $t_R(\text{minor}) = 72.205$  min.  $^1\text{H NMR}$  (400 MHz, ACETONE- $D_6$ )  $\delta$  10.05 (s, 1H), 8.20 – 8.10 (m, 2H), 7.71 (d,  $J = 7.7$  Hz, 1H), 7.65 – 7.57 (m, 2H), 7.51 (td,  $J = 7.9, 1.0$  Hz, 1H), 7.22 (t,  $J = 7.6$  Hz, 1H), 7.10 (d,  $J = 7.8$  Hz,

1H), 4.98 (t,  $J = 8.8$  Hz, 1H), 4.55 (qd,  $J = 8.7, 5.7$  Hz, 1H), 4.23 (t,  $J = 8.7$  Hz, 1H), 3.99 (dd,  $J = 18.3, 5.7$  Hz, 1H), 3.78 (dd,  $J = 18.3, 8.6$  Hz, 1H).  $^{13}\text{C}$  NMR (400 MHz, ACETONE- $D_6$ )  $\delta$  196.27, 174.32, 143.81, 140.12, 135.63, 133.40, 130.84, 129.75, 127.11, 123.78, 122.27, 112.96, 112.25, 111.81, 87.56, 73.35, 47.72, 43.21, 40.02.  $\nu_{\text{max}}$  (neat,  $\text{cm}^{-1}$ ): 2920, 1735, 1621, 1471, 1275, 1260, 1216; Exact mass calculated for  $[\text{C}_{21}\text{H}_{14}\text{ClN}_3\text{O}_3\text{Na}]^+$   $[\text{M}+\text{Na}]^+$ : 414.0616, Found: 414.0610

**3ad:(2R,4S)-4-(2-(4-bromophenyl)-2-oxoethyl)-2'-oxo-4,5-dihydro-3H-spiro[furan-2,3'-indoline]-3,3-dicarbonitrile**

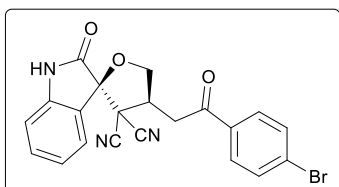

The compound **3ad** was isolated as white solid; in 54% (47.1 mg) yield, 81% ee and 6:1 dr, mp 195-197 °C;  $[\alpha]_{\text{D}}^{25} = -52.4$  (c 0.005, MeOH). The enantiomeric ratio was determined by chiral HPLC using Daicel Chiralpak IA-3 column, n-hexane/2-propanol (80:20) as eluent, flow rate = 0.9 mL/min,  $\lambda = 254$  nm.  $t_{\text{R}}$ (major) = 18.024 min,  $t_{\text{R}}$ (minor) = 79.476 min.  $^1\text{H}$  NMR (400 MHz, ACETONE- $D_6$ )  $\delta$  10.05 (s, 1H), 8.12 – 8.02 (m, 2H), 7.83 – 7.74 (m, 2H), 7.70 (d,  $J = 7.7$  Hz, 1H), 7.51 (td,  $J = 7.9, 1.0$  Hz, 1H), 7.22 (dd,  $J = 11.6, 4.5$  Hz, 1H),

7.10 (d,  $J = 7.8$  Hz, 1H), 4.98 (t,  $J = 8.8$  Hz, 1H), 4.55 (qd,  $J = 8.7, 5.6$  Hz, 1H), 4.23 (t,  $J = 8.8$  Hz, 1H), 3.99 (dd,  $J = 18.3, 5.7$  Hz, 1H), 3.77 (dd,  $J = 18.3, 8.8$  Hz, 1H).  $^{13}\text{C}$  NMR (400 MHz, ACETONE- $D_6$ )  $\delta$  196.53, 174.36, 143.87, 136.05, 133.45, 132.83, 130.98, 128.93, 127.16, 123.83, 122.33, 113.01, 112.30, 111.86, 87.60, 73.40, 47.77, 43.25, 40.05.  $\nu_{\text{max}}$  (neat,  $\text{cm}^{-1}$ ): 3300, 2925, 2850, 1734, 1687, 1622, 1585, 1472, 1398, 1326, 1261, 1210, 1070; Exact mass calculated for  $[\text{C}_{21}\text{H}_{14}\text{BrN}_3\text{O}_3\text{Na}]^+$   $[\text{M}+\text{Na}]^+$ : 458.0111 & 460.0090, Found: 458.0107 & 460.0085

**3ae:(2R,4S)-4-(2-(4-methoxyphenyl)-2-oxoethyl)-2'-oxo-4,5-dihydro-3H-spiro[furan-2,3'-indoline]-3,3-dicarbonitrile**

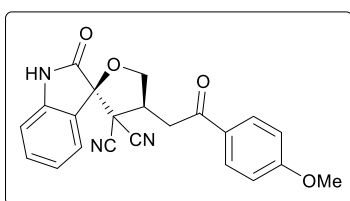

The compound **3ae** was isolated as white solid; in 65% (50.4 mg) yield, 72% ee and 6:1 dr, mp 166-168 °C;  $[\alpha]_{\text{D}}^{25} = -51.0$  (c 0.005, MeOH). The enantiomeric ratio was determined by chiral HPLC using Daicel Chiralpak IA-3 column, n-hexane/2-propanol (80:20) as eluent, flow rate = 0.9 mL/min,  $\lambda = 254$  nm.  $t_{\text{R}}$ (major) = 19.371 min,  $t_{\text{R}}$ (minor) = 84.501 min.  $^1\text{H}$  NMR (500 MHz, )  $\delta$  10.02 (s), 8.10 (d,  $J = 8.9$  Hz), 7.71 (d,  $J = 7.6$  Hz), 7.50 (td,  $J = 7.7, 0.8$  Hz), 7.21 (t,  $J = 7.6$  Hz), 7.08 (t,  $J = 8.7$  Hz), 4.97 (t,  $J = 8.8$  Hz), 4.53 (qd,  $J = 8.5, 6.2$

Hz), 4.20 (t,  $J = 8.7$  Hz), 3.94 – 3.85 (m), 3.70 (dd,  $J = 18.0, 8.4$  Hz).  $^{13}\text{C}$  NMR (400 MHz, ACETONE- $D_6$ )  $\delta$  195.50, 174.40, 164.97, 143.86, 133.40, 131.40, 130.00, 127.16, 123.80, 122.40, 114.75, 113.10, 112.36, 111.83, 87.65, 73.53, 56.02, 47.85, 43.39, 39.65.  $\nu_{\text{max}}$  (neat,  $\text{cm}^{-1}$ ): 2960, 1733, 1673, 1622, 1600, 1575, 1512, 1472, 1422, 1325, 1275, 1262, 1230, 1174, 1172; Exact mass calculated for  $[\text{C}_{22}\text{H}_{17}\text{N}_3\text{O}_4\text{Na}]^+$   $[\text{M}+\text{Na}]^+$ : 410.1111, Found: 410.1107

**3af:(2R,4S)-2'-oxo-4-(2-oxo-2-(p-tolyl)ethyl)-4,5-dihydro-3H-spiro[furan-2,3'-indoline]-3,3-dicarbonitrile**

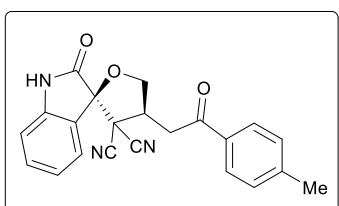

The compound **3af** was isolated as white solid; in 64% (47.5 mg) yield, 75% ee and 6:1 dr, mp 190-192 °C;  $[\alpha]_{\text{D}}^{25} = -40.0$  (c 0.005, MeOH). The enantiomeric ratio was determined by chiral HPLC using Daicel Chiralpak IA-3 column, n-hexane/2-propanol (80:20) as eluent, flow rate = 0.9 mL/min,  $\lambda = 254$  nm.  $t_{\text{R}}$ (major) = 13.826 min,  $t_{\text{R}}$ (minor) = 53.770 min.  $^1\text{H}$  NMR (400 MHz, ACETONE- $D_6$ )  $\delta$  10.03 (s, 1H), 8.02 (d,  $J = 8.3$  Hz, 2H), 7.71 (d,  $J = 7.4$  Hz, 1H), 7.50 (td,  $J = 7.7, 1.0$  Hz, 1H), 7.38 (d,  $J = 8.1$  Hz, 2H), 7.21 (dd,  $J = 11.5, 4.5$  Hz, 1H), 7.09

(d,  $J = 7.9$  Hz, 1H), 4.98 (t,  $J = 8.8$  Hz, 1H), 4.54 (qd,  $J = 8.6, 5.9$  Hz, 1H), 4.22 (t,  $J = 8.6$  Hz, 1H), 3.93 (dd,  $J = 18.1, 5.9$  Hz, 1H), 3.73 (dd,  $J = 18.2, 8.5$  Hz, 1H), 2.42 (s, 3H).  $^{13}\text{C}$  NMR (400 MHz, ACETONE- $D_6$ )  $\delta$  196.69, 174.38, 145.35, 143.86, 134.59, 133.41, 130.2, 129.19, 127.15, 123.80, 122.37, 113.07, 112.34, 111.83, 87.64, 73.48, 47.82, 43.32, 39.90, 21.59.  $\nu_{\text{max}}$  (neat,  $\text{cm}^{-1}$ ): 2923, 1733, 1684, 1605, 1472, 1261; Exact mass calculated for  $[\text{C}_{22}\text{H}_{17}\text{N}_3\text{O}_3\text{Na}]^+$   $[\text{M}+\text{Na}]^+$ : 394.1162, Found: 394.1160

**3ag:(2R,4S)-4-(2-(4-cyanophenyl)-2-oxoethyl)-2'-oxo-4,5-dihydro-3H-spiro[furan-2,3'-indoline]-3,3-dicarbonitrile**

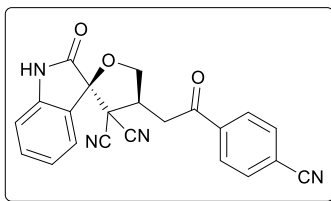

The compound **3ag** was isolated as white solid; in 65% (49.7 mg) yield, 78% ee and 6:1 dr, mp 218-220 °C;  $[\alpha]_D^{25} = -30.6$  (c 0.005, MeOH). The enantiomeric ratio was determined by chiral HPLC using Daicel Chiralpak IA-3 column, n-hexane/2-propanol (80:20) as eluent, flow rate = 0.9 mL/min,  $\lambda = 254$  nm.  $t_R(\text{major}) = 28.372$  min,  $t_R(\text{minor}) = 69.990$  min  $^1\text{H NMR}$  (500 MHz, ACETONE-D<sub>6</sub>)  $\delta$  10.03 (s, 1H), 8.31 (d,  $J = 8.5$  Hz, 2H), 8.00 (d,  $J = 8.5$  Hz, 2H), 7.71 (d,  $J = 7.6$  Hz, 1H), 7.51 (td,  $J = 7.8, 1.1$  Hz, 1H), 7.25 – 7.19 (m, 1H), 7.10 (d,  $J = 7.9$  Hz, 1H), 4.99 (t,  $J = 8.8$  Hz, 1H), 4.58 (qd,  $J = 8.7, 5.4$  Hz, 1H), 4.24 (t,  $J = 8.7$  Hz, 1H), 4.08 (dd,  $J = 18.4, 5.4$  Hz, 1H), 3.85 (dd,  $J = 18.4, 8.8$  Hz, 1H).  $^{13}\text{C NMR}$  (500 MHz, ACETONE-D<sub>6</sub>)  $\delta$  196.63, 174.25, 143.77, 140.00, 133.45, 133.38, 129.66, 127.06, 123.76, 122.21, 118.52, 117.26, 112.86, 112.18, 111.79, 87.50, 73.24, 47.67, 43.13, 40.29.  $\nu_{\text{max}}$  (neat,  $\text{cm}^{-1}$ ): 2923, 1743, 1622, 1463, 1377, 1261 1082; Exact mass calculated for  $[\text{C}_{22}\text{H}_{14}\text{N}_4\text{O}_3\text{Na}]^+$   $[\text{M}+\text{Na}]^+$ : 405.095, Found: 405.0956.

### **3ah:(2R,4S)-4-(2-(4-nitrophenyl)-2-oxoethyl)-2'-oxo-4,5-dihydro-3H-spiro[furan-2,3'-indoline]-3,3-dicarbonitrile**

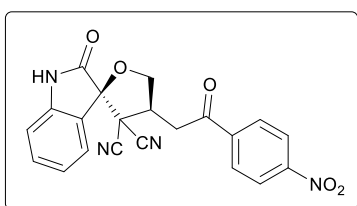

The compound **3ah** was isolated as white solid; in 65% (52.3 mg) yield, 96% ee and 6:1 dr, mp 186-188 °C;  $[\alpha]_D^{25} = -54.0$  (c 0.005, MeOH). The enantiomeric ratio was determined by chiral HPLC using Daicel Chiralpak IA-3 column, n-hexane/2-propanol (80:20) as eluent, flow rate = 0.9 mL/min,  $\lambda = 254$  nm.  $t_R(\text{major}) = 34.368$  min,  $t_R(\text{minor}) = 99.360$  min  $^1\text{H NMR}$  (400 MHz, ACETONE-D<sub>6</sub>)  $\delta$  10.07 (s, 1H), 8.52 – 8.28 (m, 4H), 7.71 (d,  $J = 7.6$  Hz, 1H), 7.51 (dt,  $J = 7.9, 4.0$  Hz, 1H), 7.22 (dd,  $J = 11.5, 4.5$  Hz, 1H), 7.10 (d,  $J = 7.9$  Hz, 1H), 5.00 (t,  $J = 8.8$  Hz, 1H), 4.59 (qd,  $J = 8.8, 5.4$  Hz, 1H), 4.26 (t,  $J = 8.6$  Hz, 1H), 4.13 (dd,  $J = 18.5, 5.3$  Hz, 1H), 3.89 (dd,  $J = 18.5, 8.9$  Hz, 1H).  $^{13}\text{C NMR}$  (400 MHz, ACETONE-D<sub>6</sub>)  $\delta$  196.58, 174.36, 151.60, 143.88, 141.58, 133.49, 130.48, 127.16, 124.67, 123.86, 122.29, 112.96, 112.28, 111.90, 87.58, 73.32, 47.75, 43.22, 40.61.  $\nu_{\text{max}}$  (neat,  $\text{cm}^{-1}$ ): 2925, 2854, 1732, 1695, 1622, 1526, 1472, 1347, 1212; Exact mass calculated for  $[\text{C}_{21}\text{H}_{14}\text{N}_4\text{O}_5\text{Na}]^+$   $[\text{M}+\text{Na}]^+$ : 425.0856, Found: 425.0850.

### **3ai:(2R,4S)-2'-oxo-4-(2-oxo-2-(4-(trifluoromethyl)phenyl)ethyl)-4,5-dihydro-3H-spiro[furan-2,3'-indoline]-3,3-dicarbonitrile**

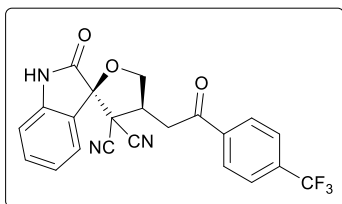

The compound **3ai** was isolated as white solid; in 61% (51.8 mg) yield, 69% ee and 6:1 dr, mp 132-134 °C;  $[\alpha]_D^{25} = -45.4$  (c 0.005, MeOH). The enantiomeric ratio was determined by chiral HPLC using Daicel Chiralpak IA-3 column, n-hexane/2-propanol (80:20) as eluent, flow rate = 0.9 mL/min,  $\lambda = 254$  nm.  $t_R(\text{major}) = 13.686$  min,  $t_R(\text{minor}) = 49.626$  min  $^1\text{H NMR}$  (400 MHz, ACETONE-D<sub>6</sub>)  $\delta$  10.05 (s, 1H), 8.35 (d,  $J = 8.3$  Hz, 2H), 7.93 (d,  $J = 8.3$  Hz, 2H), 7.71 (d,  $J = 7.7$  Hz, 1H), 7.51 (td,  $J = 7.7, 1.0$  Hz, 1H), 7.22 (dd,  $J = 8.0, 7.1$  Hz, 1H), 7.10 (d,  $J = 7.9$  Hz, 1H), 5.00 (t,  $J = 8.7$  Hz, 1H), 4.59 (qd,  $J = 8.7, 5.4$  Hz, 1H), 4.25 (t,  $J = 8.7$  Hz, 1H), 4.09 (dd,  $J = 18.3, 5.4$  Hz, 1H), 3.86 (dd,  $J = 18.4, 8.7$  Hz, 1H).  $^{13}\text{C NMR}$  (400 MHz, ACETONE-D<sub>6</sub>)  $\delta$  196.81, 174.37, 143.87, 140.11, 135.28, 134.96, 134.63, 134.31, 133.47, 129.86, 127.17, 126.63, 126.60, 123.85, 122.31, 112.99, 112.30, 111.88, 87.60, 73.36, 47.77, 43.23, 40.40.  $\nu_{\text{max}}$  (neat,  $\text{cm}^{-1}$ ): 3283, 2925, 2853, 1734, 1694, 1622, 1512, 1473, 1410, 1377, 1324, 1209, 1170, 1131, 1066; Exact mass calculated for  $[\text{C}_{22}\text{H}_{14}\text{F}_3\text{N}_3\text{O}_3\text{Na}]^+$   $[\text{M}+\text{Na}]^+$ : 448.0879, Found: 448.0875

### **3aj:(2R,4S)-4-(2-([1,1'-biphenyl]-4-yl)-2-oxoethyl)-2'-oxo-4,5-dihydro-3H-spiro[furan-2,3'-indoline]-3,3-dicarbonitrile**

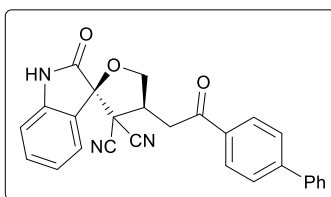

The compound **3aj** was isolated as white solid; in 70% (60.6 mg) yield, 85% ee and 6:1 dr, mp 198-200 °C;  $[\alpha]_D^{25} = -72.0$  (c 0.0025, MeOH). The enantiomeric ratio was determined by chiral HPLC using Daicel Chiralpak IA-3 column, n-hexane/2-propanol (80:20) as eluent, flow rate = 0.9 mL/min,  $\lambda = 254$  nm.  $t_R(\text{major}) = 18.163$  min,  $t_R(\text{minor}) = 61.994$  min  $^1\text{H NMR}$  (400 MHz, ACETONE-D<sub>6</sub>)  $\delta$  10.05 (s, 1H), 8.22 (d,  $J = 8.4$  Hz, 2H), 7.94 – 7.82 (m, 2H), 7.82 – 7.66 (m, 3H), 7.52 (ddd,  $J = 7.9, 4.5, 1.8$  Hz, 3H), 7.47 – 7.39 (m, 1H), 7.30 – 7.18 (m, 1H), 7.10 (d,  $J = 7.9$  Hz, 1H), 5.01 (t,  $J = 8.7$  Hz, 1H), 4.58 (qd,  $J = 8.6, 5.9$  Hz, 1H), 4.25 (t,  $J = 8.7$  Hz, 1H), 4.02 (dd,

$J = 18.2, 5.8$  Hz, 1H), 3.82 (dd,  $J = 18.2, 8.5$  Hz, 1H).  $^{13}\text{C}$  NMR (101 MHz, ACETONE- $D_6$ )  $\delta$  196.84, 174.44, 146.82, 143.93, 140.48, 135.88, 133.47, 129.97, 129.85, 129.68, 129.30, 128.06, 127.22, 123.87, 122.42, 113.13, 112.41, 111.90, 87.70, 73.53, 47.88, 43.39, 40.14.  $\nu_{\text{max}}$  (neat,  $\text{cm}^{-1}$ ): 2924, 2854, 1732, 1682, 1623, 1604, 1471, 1405, 1263, 1224, 1077; Exact mass calculated for  $[\text{C}_{27}\text{H}_{19}\text{N}_3\text{O}_3\text{Na}]^+$   $[\text{M}+\text{Na}]^+$ : 456.1319, Found: 456.1313

**3ak:(2*R*,4*S*)-4-(2-(3-methoxyphenyl)-2-oxoethyl)-2'-oxo-4,5-dihydro-3H-spiro[furan-2,3'-indoline]-3,3-dicarbonitrile**

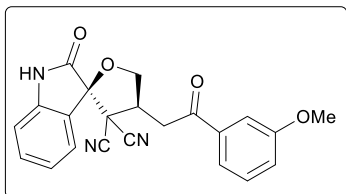

The compound **3ak** was isolated as white solid; in 67% (51.9 mg) yield, 74% ee and 7:1 dr, mp 178-180 °C;  $[\alpha]_{\text{D}}^{25} = -58.8$  (c 0.005, MeOH). The enantiomeric ratio was determined by chiral HPLC using Daicel Chiralpak IA-3 column, n-hexane/2-propanol (80:20) as eluent, flow rate = 0.9 mL/min,  $\lambda = 254$  nm.  $t_{\text{R}}$ (major) = 17.049 min,  $t_{\text{R}}$ (minor) = 26.303 min  $^1\text{H}$  NMR (400 MHz, ACETONE- $D_6$ )  $\delta$  10.03 (s, 1H), 7.72 (t,  $J = 7.8$  Hz, 2H), 7.65 – 7.57 (m, 1H), 7.50 (q,  $J = 8.2$  Hz, 2H), 7.29 – 7.18 (m, 2H), 7.10 (d,  $J = 7.9$  Hz, 1H), 4.98 (t,  $J = 8.8$  Hz, 1H), 4.54 (qd,  $J = 8.5, 6.1$  Hz, 1H), 4.23 (t,  $J = 8.6$  Hz, 1H), 3.97 (dd,  $J = 18.3, 6.0$  Hz, 1H), 3.88 (s, 3H), 3.77 (dd,  $J = 18.3, 8.4$  Hz, 1H).  $^{13}\text{C}$  NMR (400 MHz, ACETONE- $D_6$ )  $\delta$  197.10, 174.38, 160.93, 143.86, 138.39, 133.42, 130.73, 127.16, 123.81, 122.35, 121.60, 120.56, 113.43, 113.07, 112.32, 111.84, 87.68, 73.43, 55.84, 47.78, 43.32, 40.17.  $\nu_{\text{max}}$  (neat,  $\text{cm}^{-1}$ ): 3295, 2960, 2923, 2852, 1737, 1684, 1622, 1598, 1584, 1472, 1431, 1375, 1326, 1260, 1201, 1075, 1019; Exact mass calculated for  $[\text{C}_{22}\text{H}_{17}\text{N}_3\text{O}_4\text{Na}]^+$   $[\text{M}+\text{Na}]^+$ : 410.1111, Found: 410.1117

**3al:(2*R*,4*S*)-4-(2-(3,4-dichlorophenyl)-2-oxoethyl)-2'-oxo-4,5-dihydro-3H-spiro[furan-2,3'-indoline]-3,3-dicarbonitrile**

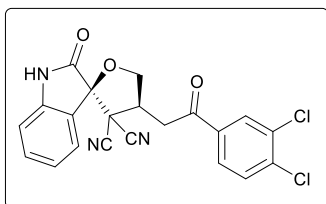

The compound **3al** was isolated as white solid; in 80% (68.2 mg) yield, 62% ee and 6:1 dr, mp 191-193 °C;  $[\alpha]_{\text{D}}^{25} = -40.0$  (c 0.005, MeOH). The enantiomeric ratio was determined by chiral HPLC using Daicel Chiralpak IA-3 column, n-hexane/2-propanol (80:20) as eluent, flow rate = 0.9 mL/min,  $\lambda = 254$  nm.  $t_{\text{R}}$ (major) = 16.201 min,  $t_{\text{R}}$ (minor) = 28.460 min  $^1\text{H}$  NMR (400 MHz, ACETONE- $D_6$ )  $\delta$  10.04 (s, 1H), 8.30 (d,  $J = 2.0$  Hz, 1H), 8.09 (dd,  $J = 8.4, 2.0$  Hz, 1H), 7.79 (d,  $J = 8.4$  Hz, 1H), 7.70 (d,  $J = 7.5$  Hz, 1H), 7.51 (td,  $J = 7.7, 0.9$  Hz, 1H), 7.29 – 7.15 (m, 1H), 7.10 (d,  $J = 7.9$  Hz, 1H), 4.98 (t,  $J = 8.8$  Hz, 1H), 4.55 (qd,  $J = 8.7, 5.5$  Hz, 1H), 4.23 (t,  $J = 8.6$  Hz, 1H), 4.05 (dd,  $J = 18.5, 5.4$  Hz, 1H), 3.80 (dd,  $J = 18.5, 8.7$  Hz, 1H).  $^{13}\text{C}$  NMR (400 MHz, ACETONE- $D_6$ )  $\delta$  195.65, 174.35, 143.85, 138.07, 137.12, 133.45, 131.94, 131.11, 130.88, 128.87, 127.16, 123.84, 122.29, 112.95, 112.24, 111.87, 87.58, 73.33, 47.73, 43.22, 40.15.  $\nu_{\text{max}}$  (neat,  $\text{cm}^{-1}$ ): 2923, 2854, 1731, 1693, 1623, 1586, 1471, 1393, 1326, 1262, 1209, 1075, 1031; Exact mass calculated for  $[\text{C}_{21}\text{H}_{13}\text{Cl}_2\text{N}_3\text{O}_3\text{Na}]^+$   $[\text{M}+\text{Na}]^+$ : 448.0226 & 450.0197, Found 448.0227 & 450.0193

**3am:(2*R*,4*S*)-4-(2-(2-fluorophenyl)-2-oxoethyl)-2'-oxo-4,5-dihydro-3H-spiro[furan-2,3'-indoline]-3,3-dicarbonitrile**

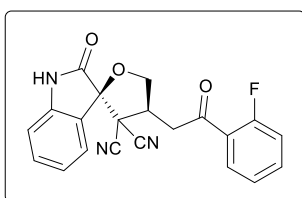

The compound **3am** was isolated as white solid; in 71% (53.3 mg) yield, 66% ee and 7:1 dr, mp 162-164 °C;  $[\alpha]_{\text{D}}^{25} = -33.6$  (c 0.005, MeOH). The enantiomeric ratio was determined by chiral HPLC using Daicel Chiralpak IA-3 column, n-hexane/2-propanol (80:20) as eluent, flow rate = 0.9 mL/min,  $\lambda = 254$  nm.  $t_{\text{R}}$ (major) = 17.874 min,  $t_{\text{R}}$ (minor) = 27.008 min  $^1\text{H}$  NMR (500 MHz, ACETONE- $D_6$ )  $\delta$  10.04 (s, 1H), 7.99 (tt,  $J = 7.6, 2.3$  Hz, 1H), 7.72 (ddt,  $J = 9.2, 5.2, 2.0$  Hz, 2H), 7.51 (td,  $J = 7.8, 1.2$  Hz, 1H), 7.41 – 7.31 (m, 2H), 7.22 (td,  $J = 7.7, 0.9$  Hz, 1H), 7.09 (t,  $J = 8.6$  Hz, 1H), 4.98 (t,  $J = 8.8$  Hz, 1H), 4.64 – 4.52 (m, 1H), 4.24 (t,  $J = 8.7$  Hz, 1H), 3.87 (ddd,  $J = 18.5, 5.5, 2.8$  Hz, 1H), 3.74 (ddd,  $J = 18.6, 8.7, 2.8$  Hz, 1H).  $^{13}\text{C}$  NMR (400 MHz, ACETONE- $D_6$ )  $\delta$  195.14, 195.10, 174.58, 164.59, 162.07, 144.09, 143.97, 136.80, 136.71, 133.69, 133.57, 131.63, 127.94, 127.39, 125.91, 125.88, 125.67, 125.54, 124.08, 122.56, 118.07, 117.83, 113.25, 112.58, 112.10, 87.81, 73.62, 48.03, 44.84, 44.75, 43.49.  $\nu_{\text{max}}$  (neat,  $\text{cm}^{-1}$ ): 3289, 2957, 2923, 2853, 1738, 1682, 1622, 1610, 1472, 1454, 1377, 1326, 1272, 1206, 1077; Exact mass calculated for  $[\text{C}_{22}\text{H}_{14}\text{FN}_3\text{O}_3\text{Na}]^+$   $[\text{M}+\text{Na}]^+$ : 398.0911, Found: 398.0915

### **3an:(2R,4S)-4-(2-(naphthalen-1-yl)-2-oxoethyl)-2'-oxo-4,5-dihydro-3H-spiro[furan-2,3'-indoline]-3,3-dicarbonitrile**

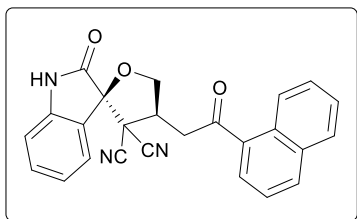

The compound **3an** was isolated as white solid; in 84% (68.5 mg) yield, 60% ee and 6:1 dr, mp 184-186 °C;  $[\alpha]_D^{25} = -52.0$  (c 0.0025, MeOH). The enantiomeric ratio was determined by chiral HPLC using Daicel Chiralpak IA-3 column, n-hexane/2-propanol (80:20) as eluent, flow rate = 0.9 mL/min,  $\lambda = 254$  nm.  $t_R$ (major) = 16.658 min,  $t_R$ (minor) = 35.906 min  $^1\text{H NMR}$  (400 MHz, ACETONE- $D_6$ )  $\delta$  10.08 (s, 1H), 8.84 (s, 1H), 8.19 – 8.09 (m, 2H), 8.02 (dd,  $J = 13.1, 8.3$  Hz, 2H), 7.73 (d,  $J = 7.6$  Hz, 1H), 7.71 – 7.66 (m, 1H), 7.66 – 7.60 (m, 1H), 7.51 (td,  $J = 7.7, 1.0$  Hz, 1H), 7.22 (dd,  $J = 8.0, 7.1$  Hz, 1H), 7.10 (d,  $J = 7.9$  Hz, 1H), 5.04 (t,  $J = 8.8$  Hz, 1H), 4.62 (qd,  $J = 8.7, 5.7$  Hz, 1H), 4.28 (t,  $J = 8.7$  Hz, 1H), 4.13 (dd,  $J = 18.1, 5.7$  Hz, 1H), 3.91 (dd,  $J = 18.2, 8.6$  Hz, 1H).  $^{13}\text{C NMR}$  (400 MHz, ACETONE- $D_6$ )  $\delta$  197.11, 174.36, 143.83, 136.65, 134.32, 133.49, 133.38, 131.22, 130.50, 129.62, 129.27, 128.61, 127.81, 127.12, 124.34, 123.77, 122.33, 113.05, 112.33, 111.80, 87.59, 73.48, 47.82, 43.38, 40.00.  $\nu_{\text{max}}$  (neat,  $\text{cm}^{-1}$ ): 2924, 1735, 1679, 1623, 1471, 1376, 1262, 1187, 1074; Exact mass calculated for  $[\text{C}_{25}\text{H}_{17}\text{N}_3\text{O}_3\text{Na}]^+ [\text{M}+\text{Na}]^+$ : 430.1162 found: 430.1168

### **3ao:(2R,4S)-2'-oxo-4-(2-oxopropyl)-4,5-dihydro-3H-spiro[furan-2,3'-indoline]-3,3-dicarbonitrile**

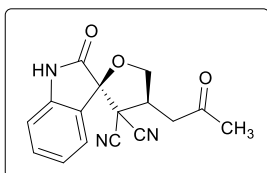

The compound **3ao** was isolated as white solid; in 62% (36.6 mg) yield, 22% ee and 7:1 dr, mp 174-176 °C;  $[\alpha]_D^{25} = -50.0$  (c 0.005, MeOH). The enantiomeric ratio was determined by chiral HPLC using Daicel Chiralpak IA-3 column, n-hexane/2-propanol (80:20) as eluent, flow rate = 0.9 mL/min,  $\lambda = 254$  nm.  $t_R$ (major) = 71.708 min,  $t_R$ (minor) = 88.201 min  $^1\text{H NMR}$  (400 MHz, ACETONE- $D_6$ )  $\delta$  10.01 (s, 1H), 7.67 (d,  $J = 7.6$  Hz, 1H), 7.49 (td,  $J = 7.8, 0.8$  Hz, 1H), 7.20 (t,  $J = 7.6$  Hz, 1H), 7.08 (d,  $J = 7.8$  Hz, 1H), 4.83 (t,  $J = 8.8$  Hz, 1H), 4.33 (qd,  $J = 8.8, 5.4$  Hz, 1H), 4.05 (t,  $J = 8.7$  Hz, 1H), 3.35 (dd,  $J = 18.3, 5.3$  Hz, 1H), 3.19 (dd,  $J = 18.3, 9.1$  Hz, 1H), 2.28 (s, 3H).  $^{13}\text{C NMR}$  (400 MHz, ACETONE- $D_6$ )  $\delta$  205.32, 174.33, 143.80, 133.42, 127.10, 123.82, 122.34, 112.93, 112.21, 111.84, 87.39, 73.32, 47.64, 43.82, 42.90, 30.60.  $\nu_{\text{max}}$  (neat,  $\text{cm}^{-1}$ ): 3280, 2960, 2923, 2853, 1738, 1622, 1604, 1471, 1412, 1377, 1326, 1208, 1175, 1080, 1018; Exact mass calculated for  $[\text{C}_{16}\text{H}_{13}\text{N}_3\text{O}_3\text{Na}]^+ [\text{M}+\text{Na}]^+$ : 394.1162 found: 394.1160

### **3ap: (2R,4S)-2'-oxo-4-(2-oxo-2-(thiophen-2-yl)ethyl)-4,5-dihydro-3H-spiro[furan-2,3'-indoline]-3,3-dicarbonitrile**

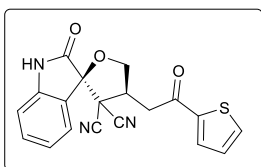

The compound **3ap** was isolated as yellow solid; in 50% (36.3 mg) yield and 7:1 dr;  $[\alpha]_D^{25} = -23.6$  (c 0.005, MeOH).  $^1\text{H NMR}$  (500 MHz, ACETONE- $D_6$ )  $\delta$  8.12 (d,  $J = 3.1$  Hz, 1H), 8.01 – 7.93 (m, 1H), 7.71 (d,  $J = 7.6$  Hz, 1H), 7.55 – 7.47 (m, 1H), 7.29 (dd,  $J = 4.7, 4.0$  Hz, 1H), 7.22 (t,  $J = 7.5$  Hz, 1H), 7.10 (d,  $J = 7.9$  Hz, 1H), 4.95 (t,  $J = 8.8$  Hz, 1H), 4.54 (dd,  $J = 8.5, 6.2$  Hz, 1H), 4.23 (t,  $J = 8.7$  Hz, 1H), 3.90 (dd,  $J = 17.8, 6.1$  Hz, 1H), 3.73 (dd,  $J = 17.8, 8.4$  Hz, 1H).  $^{13}\text{C NMR}$  (500 MHz, ACETONE- $D_6$ )  $\delta$  190.76, 175.03, 144.63, 144.56, 136.33, 135.11, 134.13, 130.14, 127.85, 124.52, 123.01, 113.63, 112.93, 112.54, 88.37, 74.08, 48.47, 43.91, 40.77. Exact mass calculated for  $[\text{C}_{19}\text{H}_{13}\text{N}_3\text{O}_3\text{SNa}]^+ [\text{M}+\text{Na}]^+$ : 386.0570 found: 386.0551

### **3ba:(2R,4S)-5'-fluoro-2'-oxo-4-(2-oxo-2-phenylethyl)-4,5-dihydro-3H-spiro[furan-2,3'-indoline]-3,3-dicarbonitrile**

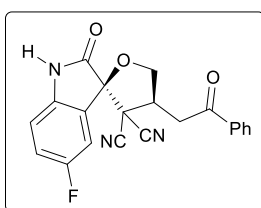

The compound **3ba** was isolated as white solid; in 76% (57.1 mg) yield, 64% ee and 7:1 dr, mp 175-177 °C;  $[\alpha]_D^{25} = -54.0$  (c 0.005, MeOH). The enantiomeric ratio was determined by chiral HPLC using Daicel Chiralpak IA-3 column, n-hexane/2-propanol (80:20) as eluent, flow rate = 0.9 mL/min,  $\lambda = 254$  nm.  $t_R$ (major) = 13.295 min,  $t_R$ (minor) = 35.689 min  $^1\text{H NMR}$  (400 MHz, ACETONE- $D_6$ )  $\delta$  10.12 (s, 1H), 8.20 – 8.06 (m, 2H), 7.68 (t,  $J = 7.5$  Hz, 1H), 7.57 (t,  $J = 7.7$  Hz, 2H), 7.47 (dd,  $J = 8.1, 2.6$  Hz, 1H), 7.37 – 7.26 (m, 1H), 7.14 (dd,  $J = 8.7, 4.3$  Hz, 1H), 5.00 (t,  $J = 8.8$  Hz, 1H), 4.54 (qd,  $J = 8.6, 5.8$  Hz, 1H), 4.26 (t,  $J = 8.7$  Hz, 1H), 3.99 (dd,  $J = 18.3, 5.7$  Hz, 1H), 3.79 (dd,  $J = 18.2, 8.5$  Hz, 1H).  $^{13}\text{C NMR}$  (400 MHz, ACETONE- $D_6$ )  $\delta$  197.12, 174.25, 160.76, 158.36, 139.97, 136.93, 134.43, 129.55, 129.00, 123.85, 123.77, 120.01, 119.78, 114.81, 114.55, 113.09, 113.01, 112.73, 112.11, 87.44, 73.59, 47.75, 43.28, 39.88.  $\nu_{\text{max}}$  (neat,  $\text{cm}^{-1}$ ): 3282, 2960, 2924, 2853, 1738, 1684, 1629, 1596, 1580, 1490, 1463, 1449, 1414, 1372, 1303,

1278, 1261, 1221, 1205, 1181, 1068; Exact mass calculated for  $[C_{21}H_{14}FN_3O_3Na]^+$   $[M+Na]^+$ : 398.0911 found: 398.0904

### **3ca:(2R,4S)-5'-bromo-2'-oxo-4-(2-oxo-2-phenylethyl)-4,5-dihydro-3H-spiro[furan-2,3'-indoline]-3,3-dicarbonitrile**

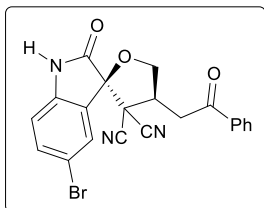

The compound **3ca** was isolated as white solid; in 50% (43.6 mg) yield, 77% ee and 8:1 dr, mp 207-208 °C;  $[\alpha]_D^{25} = +10$  (c 0.005, MeOH). The enantiomeric ratio was determined by chiral HPLC using Daicel Chiralpak IA-3 column, n-hexane/2-propanol (80:20) as eluent, flow rate = 0.9 mL/min,  $\lambda = 254$  nm.  $t_R(\text{major}) = 13.329$  min,  $t_R(\text{minor}) = 36.244$  min  $^1H$  NMR (400 MHz, ACETONE- $D_6$ )  $\delta$  10.22 (s, 1H), 8.13 (dd,  $J = 8.3, 1.1$  Hz, 2H), 7.81 (d,  $J = 2.0$  Hz, 1H), 7.73 – 7.65 (m, 2H), 7.57 (t,  $J = 7.7$  Hz, 2H), 7.10 (d,  $J = 8.4$  Hz, 1H), 4.99 (t,  $J = 8.7$  Hz, 1H), 4.53 (qd,  $J = 8.6, 5.8$  Hz, 1H), 4.27 (t,  $J = 8.8$  Hz, 1H), 3.99 (dd,  $J = 18.2, 5.9$  Hz, 1H), 3.79 (dd,  $J = 18.2, 8.5$  Hz, 1H).  $^{13}C$  NMR (400 MHz, ACETONE- $D_6$ )  $\delta$  197.16, 173.89, 143.17, 136.98, 136.28, 134.49, 130.02, 129.61, 129.06, 124.56, 115.57, 113.85, 112.74, 112.15, 87.21, 73.68, 47.83, 43.35, 39.91.  $\nu_{\text{max}}$  (neat,  $cm^{-1}$ ): 1737, 1260, 750; Exact mass calculated for  $[C_{21}H_{14}BrN_3O_3Na]^+$   $[M+Na]^+$ : 458.0111 & 460.0090 found: 458.0099 & 460.0086

### **3da:(2R,4S)-5'-iodo-2'-oxo-4-(2-oxo-2-phenylethyl)-4,5-dihydro-3H-spiro[furan-2,3'-indoline]-3,3-dicarbonitrile**

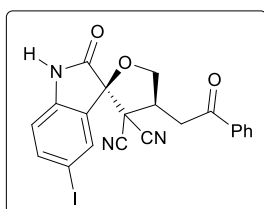

The compound **3da** was isolated as white solid; in 50% (48.3 mg) yield, 84% ee and 6:1 dr, mp 196-198 °C;  $[\alpha]_D^{25} = -39.3$  (c 0.005, MeOH). The enantiomeric ratio was determined by chiral HPLC using Daicel Chiralpak IA-3 column, n-hexane/2-propanol (80:20) as eluent, flow rate = 0.9 mL/min,  $\lambda = 254$  nm.  $t_R(\text{major}) = 14.303$  min,  $t_R(\text{minor}) = 44.828$  min  $^1H$  NMR (400 MHz, ACETONE- $D_6$ )  $\delta$  10.24 (s, 1H), 8.13 (dd,  $J = 8.2, 1.1$  Hz, 2H), 7.97 (d,  $J = 1.7$  Hz, 1H), 7.87 (dd,  $J = 8.1, 1.8$  Hz, 1H), 7.69 (t,  $J = 7.3$  Hz, 1H), 7.58 (t,  $J = 7.7$  Hz, 2H), 6.98 (d,  $J = 8.2$  Hz, 1H), 4.98 (t,  $J = 8.7$  Hz, 1H), 4.52 (qd,  $J = 8.6, 5.9$  Hz, 1H), 4.26 (t,  $J = 8.6$  Hz, 1H), 3.99 (dd,  $J = 18.2, 5.9$  Hz, 1H), 3.78 (dd,  $J = 18.3, 8.5$  Hz, 1H).  $^{13}C$  NMR (400 MHz, ACETONE- $D_6$ )  $\delta$  197.15, 173.66, 143.70, 142.19, 136.96, 135.72, 134.46, 129.58, 129.04, 124.79, 114.17, 112.74, 112.14, 87.00, 85.12, 73.62, 47.81, 43.31, 39.89.  $\nu_{\text{max}}$  (neat,  $cm^{-1}$ ): 2959, 2922, 2852, 1739, 1687, 1617, 1470, 1368, 1275, 1260, 1207, 1081, 1020; Exact mass calculated for  $[C_{21}H_{14}IN_3O_3Na]^+$   $[M+Na]^+$ : 505.9972 found: 505.9977

### **3ea:(2R,4S)-5'-methoxy-2'-oxo-4-(2-oxo-2-phenylethyl)-4,5-dihydro-3H-spiro[furan-2,3'-indoline]-3,3-dicarbonitrile**

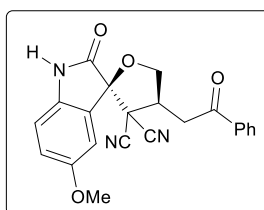

The compound **3ea** was isolated as white solid; in 85% (65.8 mg) yield, 74% ee and 7:1 dr, mp 176-178 °C;  $[\alpha]_D^{25} = -33.0$  (c 0.005, MeOH). The enantiomeric ratio was determined by chiral HPLC using Daicel Chiralpak IA-3 column, n-hexane/2-propanol (80:20) as eluent, flow rate = 0.9 mL/min,  $\lambda = 254$  nm.  $t_R(\text{major}) = 16.591$  min,  $t_R(\text{minor}) = 48.726$  min  $^1H$  NMR (400 MHz, ACETONE- $D_6$ )  $\delta$  9.88 (s, 1H), 8.13 (d,  $J = 7.4$  Hz, 2H), 7.68 (t,  $J = 7.4$  Hz, 1H), 7.57 (t,  $J = 7.7$  Hz, 2H), 7.31 (d,  $J = 2.5$  Hz, 1H), 7.07 (dd,  $J = 8.6, 2.5$  Hz, 1H), 7.02 (d,  $J = 8.5$  Hz, 1H), 4.99 (t,  $J = 8.8$  Hz, 1H), 4.56 (qd,  $J = 8.6, 5.7$  Hz, 1H), 4.23 (t,  $J = 8.6$  Hz, 1H), 3.98 (dd,  $J = 18.2, 5.6$  Hz, 1H), 3.85 – 3.72 (m, 4H).  $^{13}C$  NMR (400 MHz, ACETONE- $D_6$ )  $\delta$  197.22, 174.34, 156.91, 137.05, 136.72, 134.47, 129.62, 129.07, 123.40, 118.14, 113.76, 113.02, 112.46, 112.38, 87.86, 73.54, 56.13, 47.92, 43.31, 40.05.  $\nu_{\text{max}}$  (neat,  $cm^{-1}$ ): 2959, 2923, 2852, 1733, 1495, 1466, 1377, 1261, 1210, 1022, 801, 751; Exact mass calculated for  $[C_{22}H_{17}N_3O_4Na]^+$   $[M+Na]^+$ : 410.1111 found: 410.1111

### **3fa:(2R,4S)-5'-methyl-2'-oxo-4-(2-oxo-2-phenylethyl)-4,5-dihydro-3H-spiro[furan-2,3'-indoline]-3,3-dicarbonitrile**



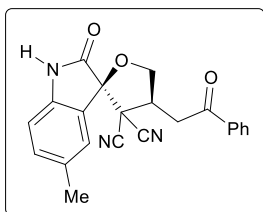

The compound **3fa** was isolated as white solid; in 75% (55.7 mg) yield, 70% ee and 7:1 dr, mp 194-196 °C;  $[\alpha]_D^{25} = -31.0$  (c 0.01, MeOH). The enantiomeric ratio was determined by chiral HPLC using Daicel Chiralpak IA-3 column, n-hexane/2-propanol (80:20) as eluent, flow rate = 0.9 mL/min,  $\lambda = 254$  nm.  $t_R(\text{major}) = 13.000$  min,  $t_R(\text{minor}) = 42.459$  min  $^1\text{H NMR}$  (400 MHz, ACETONE- $D_6$ )  $\delta$  9.94 (s, 1H), 8.13 (dd,  $J = 5.1, 3.5$  Hz, 2H), 7.68 (t,  $J = 7.5$  Hz, 1H), 7.58 (t,  $J = 7.7$  Hz, 2H), 7.52 (s, 1H), 7.31 (d,  $J = 7.9$  Hz, 1H), 6.98 (d,  $J = 8.0$  Hz, 1H), 4.98 (t,  $J = 8.8$  Hz, 1H), 4.56 (qd,  $J = 8.7, 5.7$  Hz, 1H), 4.22 (t,  $J = 8.6$  Hz, 1H), 3.98 (dd,  $J = 18.3, 5.6$  Hz, 1H), 3.77 (dd,  $J = 18.2, 8.6$  Hz, 1H), 2.36 (s, 3H).  $^{13}\text{C NMR}$  (400 MHz, ACETONE- $D_6$ )  $\delta$  197.25, 174.43, 141.40, 137.09, 134.50, 133.72, 133.39, 129.65, 129.10, 127.72, 122.43, 113.12, 112.38, 111.61, 87.73, 73.47, 47.87, 43.32, 40.08, 21.09.  $\nu_{\text{max}}$  (neat,  $\text{cm}^{-1}$ ): 2922, 1737, 1366, 1275, 1260, 1217, 1021, 800, 750; Exact mass calculated for  $[\text{C}_{22}\text{H}_{17}\text{N}_3\text{O}_3\text{Na}]^+ [\text{M}+\text{Na}]^+$ : 394.1162 found: 394.1162

### **3ga:(2R,4S)-5'-nitro-2'-oxo-4-(2-oxo-2-phenylethyl)-4,5-dihydro-3H-spiro[furan-2,3'-indoline]-3,3-dicarbonitrile**

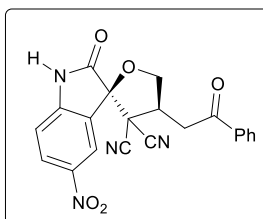

The compound **3ga** was isolated as white solid; in 72% (57.9 mg) yield, 79% ee and 10:1 dr, mp 233-235 °C;  $[\alpha]_D^{25} = -36.0$  (c 0.005, MeOH). The enantiomeric ratio was determined by chiral HPLC using Daicel Chiralpak IA-3 column, n-hexane/2-propanol (80:20) as eluent, flow rate = 0.9 mL/min,  $\lambda = 254$  nm.  $t_R(\text{major}) = 14.411$  min,  $t_R(\text{minor}) = 39.220$  min  $^1\text{H NMR}$  (500 MHz, Acetone- $d_6$ )  $\delta$  10.67 (s, 1H), 8.63 – 8.38 (m, 2H), 8.14 (dd,  $J = 8.4, 1.1$  Hz, 2H), 7.73 – 7.63 (m, 1H), 7.58 (t,  $J = 7.7$  Hz, 2H), 7.37 (d,  $J = 8.7$  Hz, 1H), 5.03 (t,  $J = 8.8$  Hz, 1H), 4.53 (qd,  $J = 8.6, 5.8$  Hz, 1H), 4.36 (t,  $J = 8.8$  Hz, 1H), 4.03 (dd,  $J = 18.3, 5.8$  Hz, 1H), 3.83 (dd,  $J = 18.3, 8.5$  Hz, 1H).  $^{13}\text{C NMR}$  (101 MHz, ACETONE- $D_6$ )  $\delta$  197.20, 174.49, 149.75, 144.57, 136.99, 134.56, 130.08, 129.65, 129.11, 123.29, 122.88, 112.57, 112.47, 112.02, 86.87, 73.90, 47.84, 43.54, 39.90.  $\nu_{\text{max}}$  (neat,  $\text{cm}^{-1}$ ): 2959, 2924, 2854, 1746, 1682, 1630, 1579, 1529, 1449, 1342, 1278, 1261, 1206, 1132, 1104, 1003; Exact mass calculated for  $[\text{C}_{21}\text{H}_{14}\text{N}_4\text{O}_5\text{Na}]^+ [\text{M}+\text{Na}]^+$ : 425.0856 found: 425.0858

### **3ha:(2R,4S)-6'-chloro-2'-oxo-4-(2-oxo-2-phenylethyl)-4,5-dihydro-3H-spiro[furan-2,3'-indoline]-3,3-dicarbonitrile**

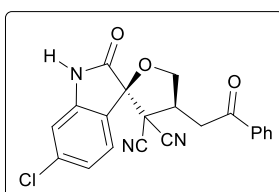

The compound **3ha** was isolated as white solid; in 65% (50.9 mg) yield, 79% ee and 7:1 dr, mp 212-214 °C;  $[\alpha]_D^{25} = -68$  (c 0.005, MeOH). The enantiomeric ratio was determined by chiral HPLC using Daicel Chiralpak IA-3 column, n-hexane/2-propanol (80:20) as eluent, flow rate = 0.9 mL/min,  $\lambda = 254$  nm.  $t_R(\text{major}) = 12.415$  min,  $t_R(\text{minor}) = 47.738$  min  $^1\text{H NMR}$  (400 MHz, ACETONE- $D_6$ )  $\delta$  10.21 (s, 1H), 8.13 (d,  $J = 7.4$  Hz, 2H), 7.68 (t,  $J = 6.7$  Hz, 2H), 7.57 (t,  $J = 7.7$  Hz, 2H), 7.27 (dd,  $J = 8.3, 1.9$  Hz, 1H), 7.15 (d,  $J = 1.9$  Hz, 1H), 4.98 (t,  $J = 8.8$  Hz, 1H), 4.52 (qd,  $J = 8.6, 5.8$  Hz, 1H), 4.25 (t,  $J = 8.7$  Hz, 1H), 3.98 (dd,  $J = 18.2, 5.8$  Hz, 1H), 3.78 (dd,  $J = 18.2, 8.5$  Hz, 1H).  $^{13}\text{C NMR}$  (101 MHz, ACETONE- $D_6$ )  $\delta$  197.24, 174.30, 145.34, 138.77, 137.07, 134.55, 129.67, 129.13, 128.61, 123.87, 121.15, 112.90, 112.38, 112.25, 87.27, 73.62, 47.82, 43.39, 40.04.  $\nu_{\text{max}}$  (neat,  $\text{cm}^{-1}$ ): 3275, 2958, 2920, 1753, 1736, 1688, 1597, 1580, 1487, 1448, 1416, 1355, 1320, 1221, 1203, 1139; Exact mass calculated for  $[\text{C}_{21}\text{H}_{14}\text{ClN}_3\text{O}_3\text{Na}]^+ [\text{M}+\text{Na}]^+$ : 414.0616 found: 414.0612

### **3ia:(2R,4S)-6'-bromo-2'-oxo-4-(2-oxo-2-phenylethyl)-4,5-dihydro-3H-spiro[furan-2,3'-indoline]-3,3-dicarbonitrile**

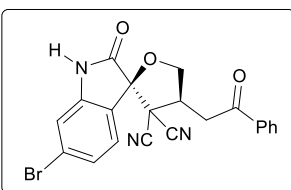

The compound **3ia** was isolated as white solid; in 60% (52.4 mg) yield, 84% ee and 7:1 dr, mp 201-203 °C;  $[\alpha]_D^{25} = -39.6$  (c 0.005, MeOH). The enantiomeric ratio was determined by chiral HPLC using Daicel Chiralpak IA-3 column, n-hexane/2-propanol (80:20) as eluent, flow rate = 0.9 mL/min,  $\lambda = 254$  nm.  $t_R(\text{major}) = 12.323$  min,  $t_R(\text{minor}) = 47.573$  min  $^1\text{H NMR}$  (400 MHz, ACETONE- $D_6$ )  $\delta$  10.21 (s, 1H), 8.16 – 8.09 (m, 2H), 7.68 (t,  $J = 7.4$  Hz, 1H), 7.65 – 7.54 (m, 3H), 7.43 (dd,  $J = 8.0, 1.8$  Hz, 1H), 7.30 (d,  $J = 1.7$  Hz, 1H), 4.98 (t,  $J = 8.7$  Hz, 1H), 4.52 (qd,  $J = 8.6, 5.9$  Hz, 1H), 4.25 (t,  $J = 8.6$  Hz, 1H), 3.98 (dd,  $J = 18.3, 5.7$  Hz, 1H), 3.78 (dd,  $J = 18.3, 8.5$  Hz, 1H).  $^{13}\text{C NMR}$  (400 MHz, ACETONE- $D_6$ )  $\delta$  197.23, 174.19, 145.37, 137.05, 134.53, 129.66, 129.12, 128.81, 126.86, 121.62, 115.22, 115.18, 112.88, 112.23, 87.33, 73.63, 47.75, 43.38, 40.01.  $\nu_{\text{max}}$  (neat,  $\text{cm}^{-1}$ ): 2960, 2923, 2852, 1739, 1688, 1614, 1377, 1322,

1262, 1221, 1080; Exact mass calculated for  $[C_{21}H_{14}BrN_3O_3Na]^+$   $[M+Na]^+$ : 458.0111 & 460.0090 found: 458.0100 460.0079

### 3ja:(2R,4S)-7'-fluoro-2'-oxo-4-(2-oxo-2-phenylethyl)-4,5-dihydro-3H-spiro[furan-2,3'-indoline]-3,3-dicarbonitrile

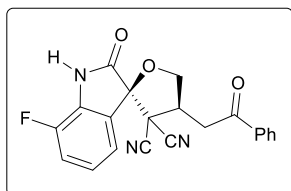

The compound **3ja** was isolated as white solid; in 55% (41.3 mg) yield, 68% ee and 6:1 dr, mp 173-175 °C;  $[\alpha]_D^{25} = -60$  (c 0.005, MeOH). The enantiomeric ratio was determined by chiral HPLC using Daicel Chiralpak IA-3 column, n-hexane/2-propanol (80:20) as eluent, flow rate = 0.9 mL/min,  $\lambda = 254$  nm.  $t_R$ (major) = 19.898 min,  $t_R$ (minor) = 42.046 min  $^1H$  NMR (500 MHz, ACETONE- $D_6$ )  $\delta$  8.20 – 8.08 (m, 2H), 7.68 (tt,  $J = 6.9, 1.2$  Hz, 1H), 7.64 – 7.49 (m, 3H), 7.40 (ddd,  $J = 10.0, 8.5, 0.9$  Hz, 1H), 7.27 (ddd,  $J = 8.5, 7.7, 4.8$  Hz, 1H), 5.00 (t,  $J = 8.8$  Hz, 1H), 4.55 (qd,  $J = 8.6, 5.9$  Hz, 1H), 4.27 (t,  $J = 8.7$  Hz, 1H), 3.99 (dd,  $J = 18.2, 5.8$  Hz, 1H), 3.79 (dd,  $J = 18.2, 8.5$  Hz, 1H).  $^{13}C$  NMR (400 MHz, ACETONE- $D_6$ )  $\delta$  197.14, 174.01, 149.08, 146.65, 136.95, 134.44, 131.11, 130.98, 129.56, 129.01, 124.88, 124.83, 123.11, 123.07, 120.44, 120.27, 112.78, 112.04, 87.52, 73.58, 47.83, 43.22, 39.90.  $\nu_{max}$  (neat,  $cm^{-1}$ ): 2917, 2849, 1742, 1686, 1646, 1598, 1493, 1470, 1449, 1364, 1322, 1259, 1217, 1141, 1025; Exact mass calculated for  $[C_{21}H_{14}FN_3O_3Na]^+$   $[M+Na]^+$ : 398.0911 found: 398.0903

### 3ka:(2R,4S)-7'-chloro-2'-oxo-4-(2-oxo-2-phenylethyl)-4,5-dihydro-3H-spiro[furan-2,3'-indoline]-3,3-dicarbonitrile

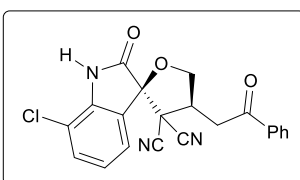

The compound **3ka** was isolated as white solid; in 78% (61.1 mg) yield, 70% ee and 7:1 dr, mp 86-88 °C;  $[\alpha]_D^{25} = -74.0$  (c 0.005, MeOH). The enantiomeric ratio was determined by chiral HPLC using Daicel Chiralpak IA-3 column, n-hexane/2-propanol (80:20) as eluent, flow rate = 0.9 mL/min,  $\lambda = 254$  nm.  $t_R$ (major) = 36.163 min,  $t_R$ (minor) = 54.271 min  $^1H$  NMR (500 MHz, )  $\delta$  10.43 (s, 1H), 8.22 – 8.07 (m, 2H), 7.76 – 7.63 (m, 2H), 7.62 – 7.47 (m, 3H), 7.27 (t,  $J = 7.9$  Hz, 1H), 5.00 (t,  $J = 8.8$  Hz, 1H), 4.53 (qd,  $J = 8.6, 5.9$  Hz, 1H), 4.26 (t,  $J = 8.8$  Hz, 1H), 3.98 (dd,  $J = 18.2, 5.8$  Hz, 1H), 3.79 (dd,  $J = 18.2, 8.5$  Hz, 1H).  $^{13}C$  NMR (400 MHz, ACETONE- $D_6$ )  $\delta$  197.18, 174.12, 141.51, 137.00, 134.51, 133.40, 129.63, 129.08, 125.77, 125.10, 124.13, 116.54, 112.83, 112.08, 87.99, 73.69, 47.89, 43.35, 39.94.  $\nu_{max}$  (neat,  $cm^{-1}$ ): 3283, 2919, 2850, 1743, 1687, 1622, 1597, 1476, 1450, 1372, 1319, 1261, 1222, 1182, 1147, 1094, 1020; Exact mass calculated for  $[C_{21}H_{14}ClN_3O_3Na]^+$   $[M+Na]^+$ : 414.0616 found: 414.0616

### 4aa:(3R,3aS,7aS)-4-imino-2'-oxo-6-phenyl-1,6,7,7a-tetrahydrospiro[furo[3,4-c]pyran-3,3'-indoline]-3a(4H)-carbonitrile

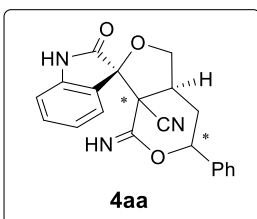

The compound **4aa** was isolated as white solid; in 68% (48.8 mg) yield, 80% ee 1:1 dr, mp 158-160;  $[\alpha]_D^{25} = -39.4$  (c 0.0037, MeOH).  $^1H$  NMR (500 MHz, )  $\delta$  7.88 (d,  $J = 11.5$  Hz, 2H), 7.66 (t,  $J = 7.4$  Hz, 2H), 7.39 – 7.29 (m, 11H), 7.28 – 7.23 (m, 2H), 7.10 (td,  $J = 7.7, 1.0$  Hz, 2H), 6.83 (dd,  $J = 7.8, 4.2$  Hz, 2H), 4.88 (dd,  $J = 9.6, 3.2$  Hz, 1H), 4.78 (dd,  $J = 9.0, 3.7$  Hz, 1H), 4.68 (t,  $J = 8.8$  Hz, 1H), 4.60 (t,  $J = 8.6$  Hz, 1H), 4.28 – 4.19 (m, 1H), 4.19 – 4.10 (m, 1H), 4.06 (t,  $J = 9.3$  Hz, 1H), 3.95 (t,  $J = 9.0$  Hz, 1H), 2.29 (ddd,  $J = 14.3, 9.0, 7.0$  Hz, 2H), 2.22 (ddd,  $J = 14.2, 5.8, 3.3$  Hz, 1H), 2.17 – 2.11 (m, 1H), 2.11 – 2.03 (m, 2H).  $^{13}C$  NMR (500 MHz, )  $\delta$  174.25, 174.20, 143.62, 143.52, 141.36, 141.32, 132.51, 129.00, 128.98, 128.48, 128.36, 126.94, 126.83, 125.77, 125.60, 123.97, 121.69, 121.61, 112.41, 112.26, 111.03, 111.00, 110.89, 87.39, 86.68, 73.74, 73.14, 72.79, 72.66, 47.98, 47.68, 44.95, 44.71, 38.99, 38.70.  $\nu_{max}$  (neat,  $cm^{-1}$ ): 3507, 2964, 1738, 1625, 1474, 1262, 1024; Exact mass calculated for  $[C_{21}H_{17}N_3O_3Na]^+$   $[M+Na]^+$ : 382.1162 found: 382.1164

## References

1. Y. Lin, B.-L. Zhao, D.-M. Du, *J. Org. Chem.*, 2019, **84**, 10209–10220.
2. S.-H. Huang, Y.-W. Shih, W.-T. Huang, D.-H. Li, T.-F. Yang, *RSC Adv.*, 2016, **6**, 91870–91874.
3. (a) Y. Flukata, K. Asano, S. Matsubara, *J. Am. Chem. Soc.*, 2013, **135**, 12160;  
(b) R. Miyaji, K. Asano, S. Matsubara, *Org. Lett.*, 2013, **15**, 3658;  
(c) J. Xu, Y. Hu, D. Huang, K.-H. Wang, C. Xu, T. Niu, *Adv. Synth. Catal.*, 2012, **354**, 515;  
(d) S. Meninno, A. Vidal-Albalat, A. Lattanzi, *Org. Lett.*, 2015, **17**, 4348;  
(e) Y.-L. Zhao, Q.-X. Lou, L.-S. Wang, W.-H. Hu, J.-L. Zhao, *Angew. Chem. Int. Ed.*, 2017, **129**, 344;  
(f) F. Manoni, S. J. Connon, *Angew. Chem.*, 2014, **126**, 2666.

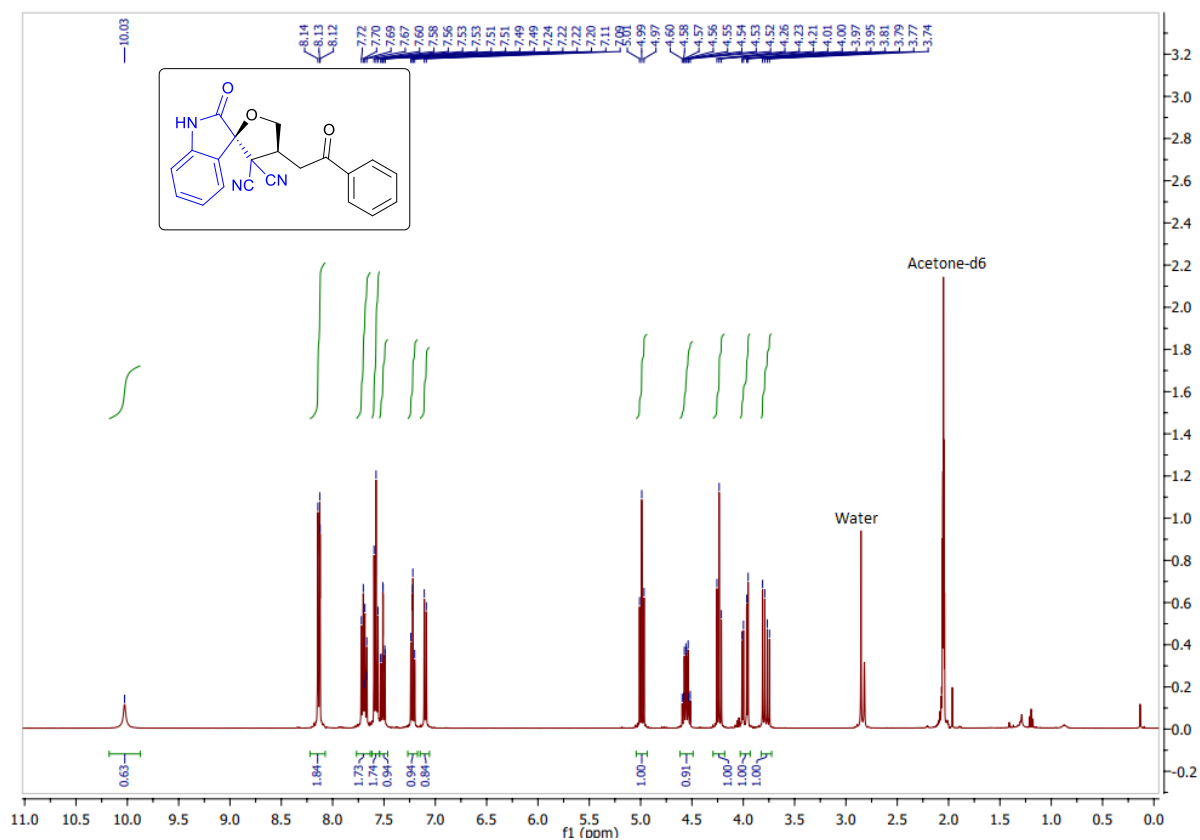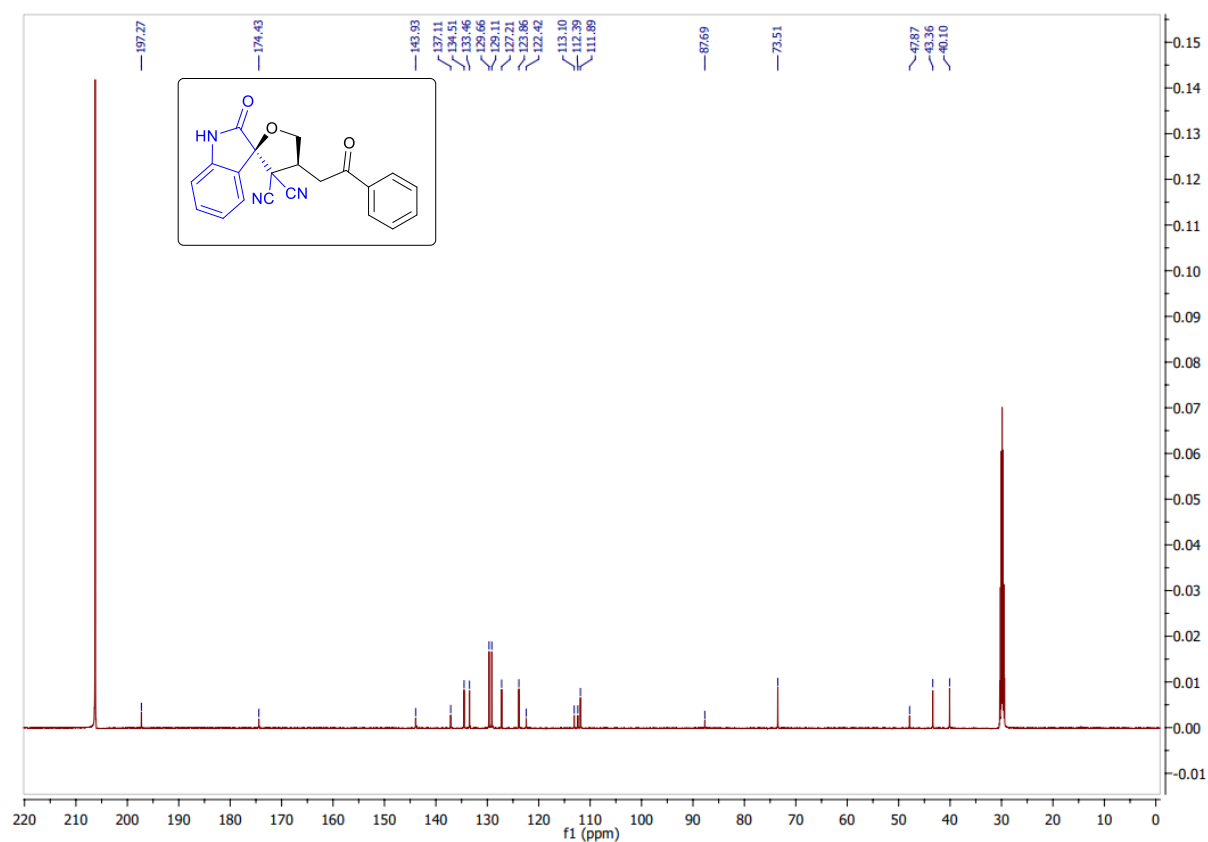

400 MHz <sup>1</sup>H NMR and 500 MHz <sup>13</sup>C NMR (Acetone-d<sub>6</sub>) Spectra of 3aa

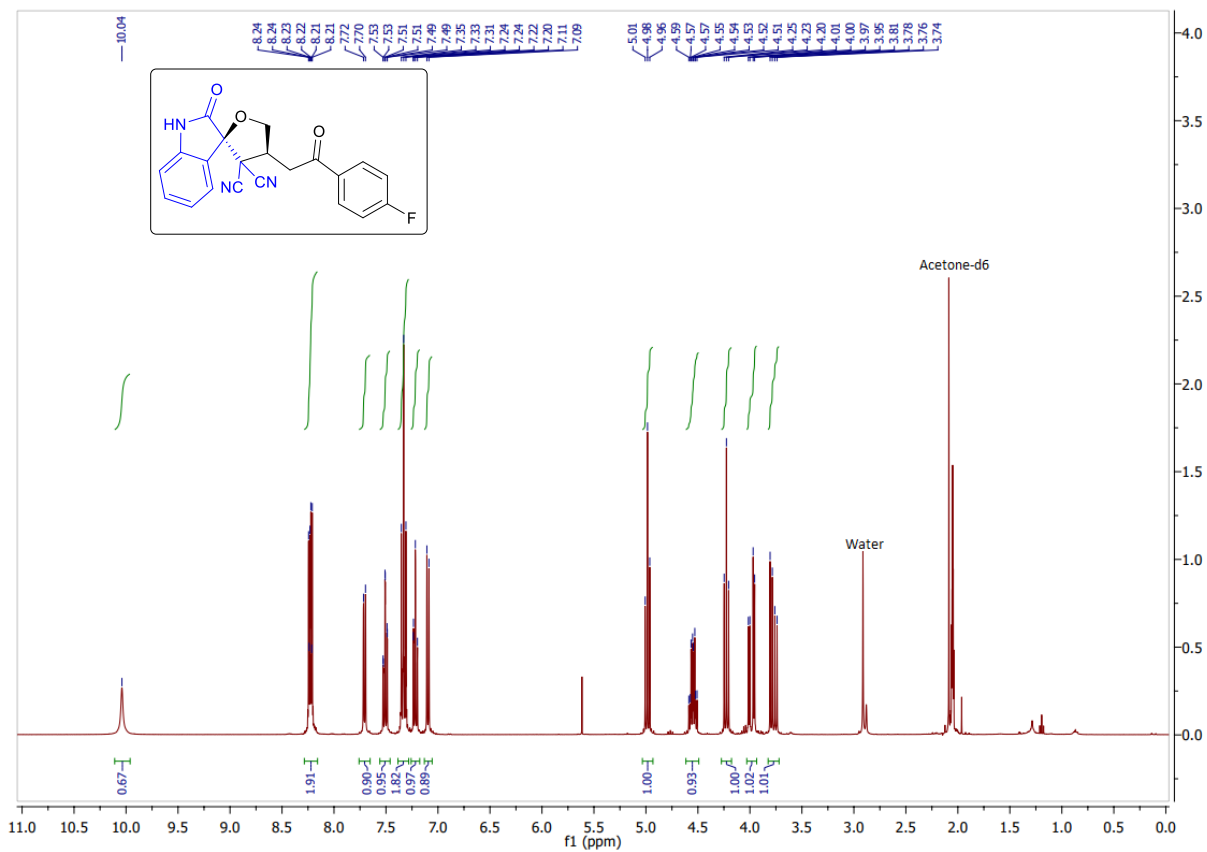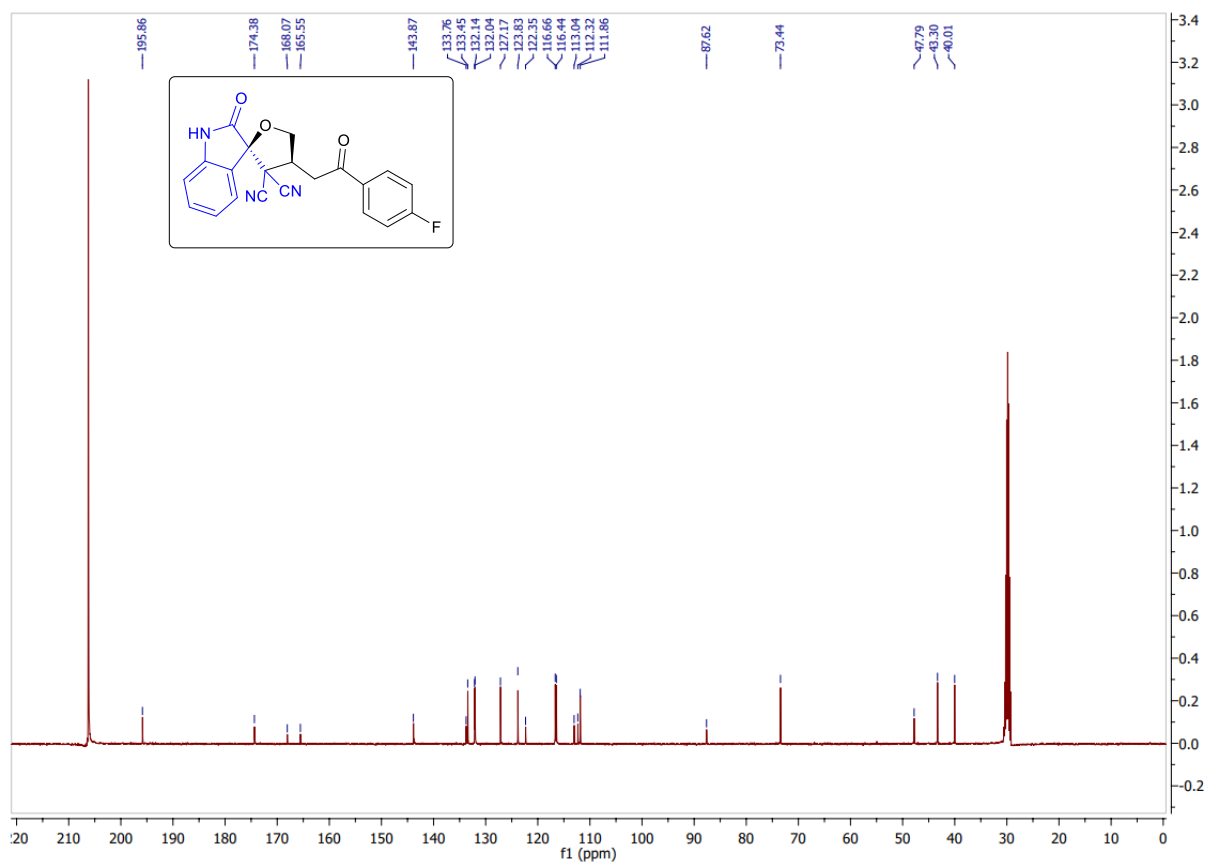

400 MHz <sup>1</sup>H NMR and 400 MHz <sup>13</sup>C NMR (Acetone-d<sub>6</sub>) Spectra of 3ab

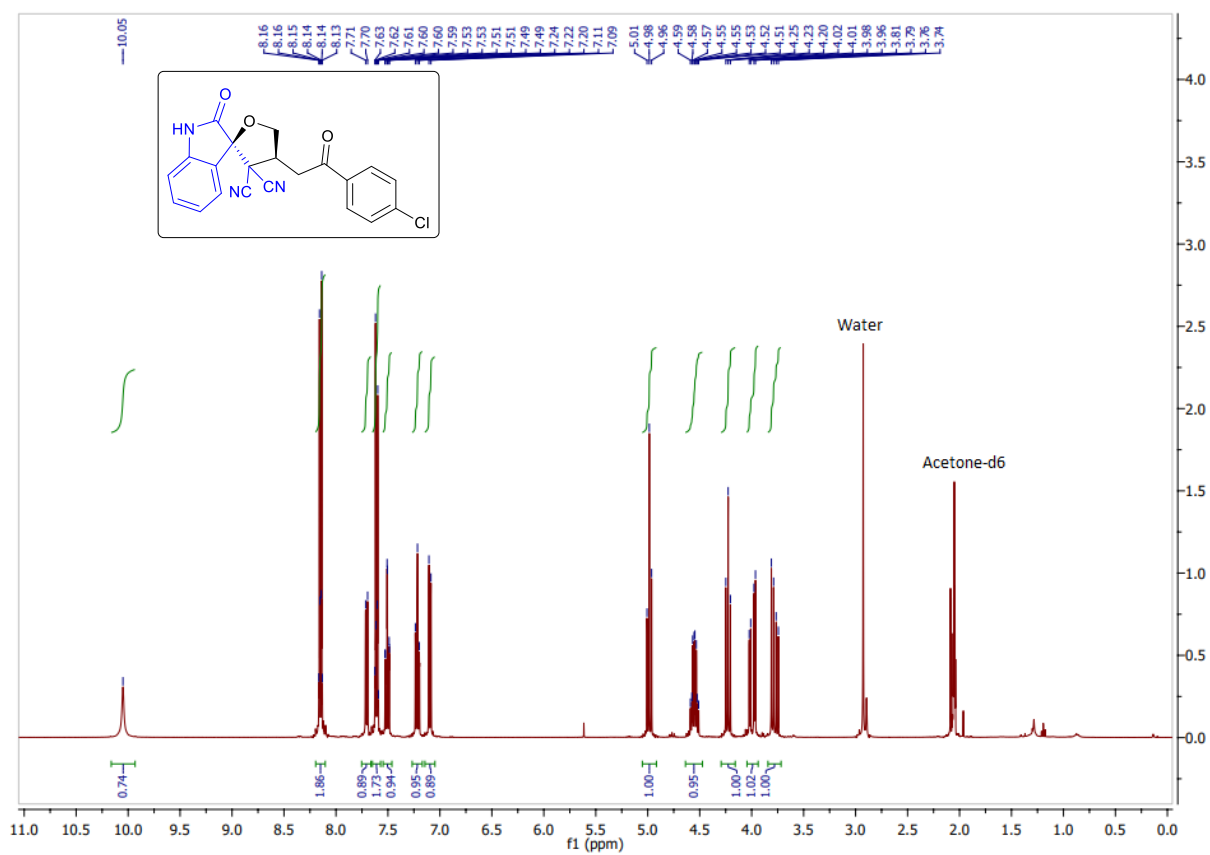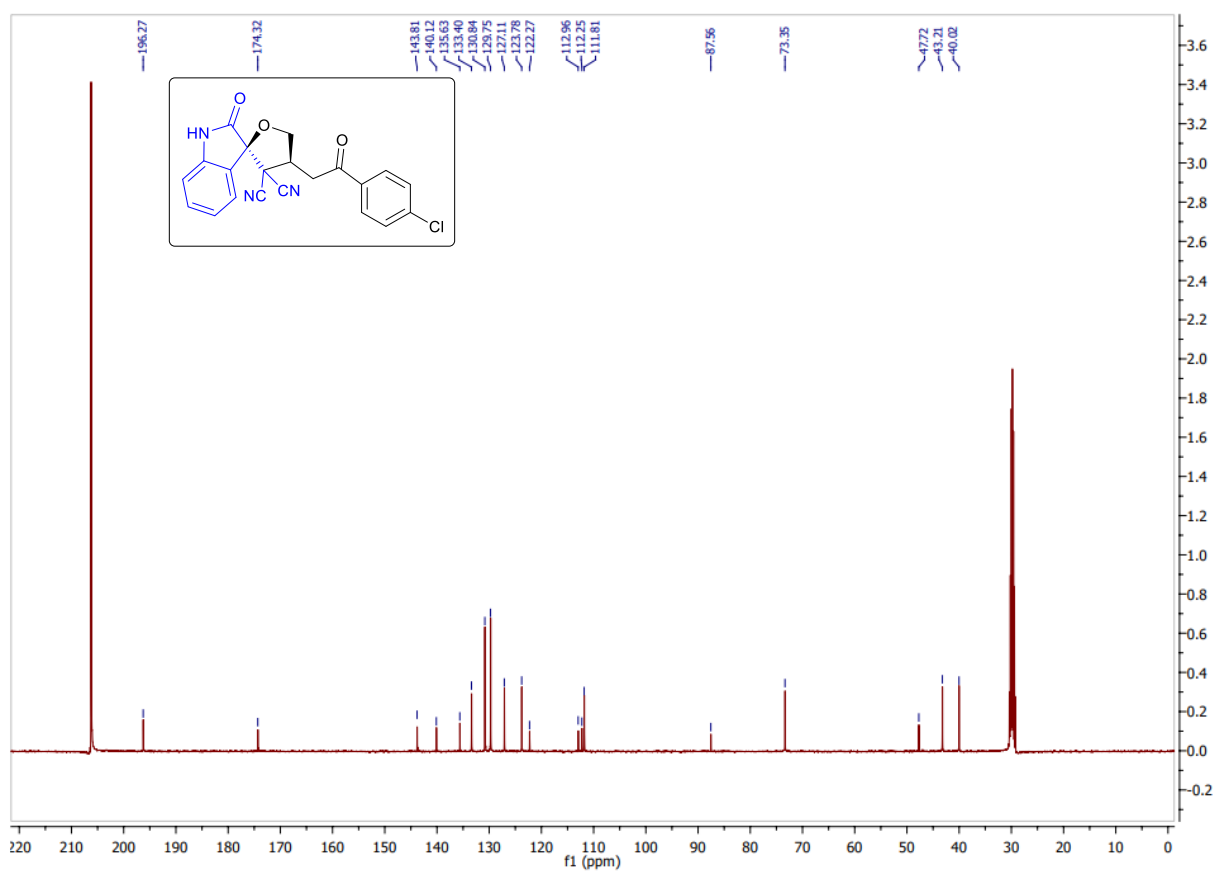

400 MHz <sup>1</sup>H NMR and 400 MHz <sup>13</sup>C NMR (Acetone-d<sub>6</sub>) Spectra of 3ac

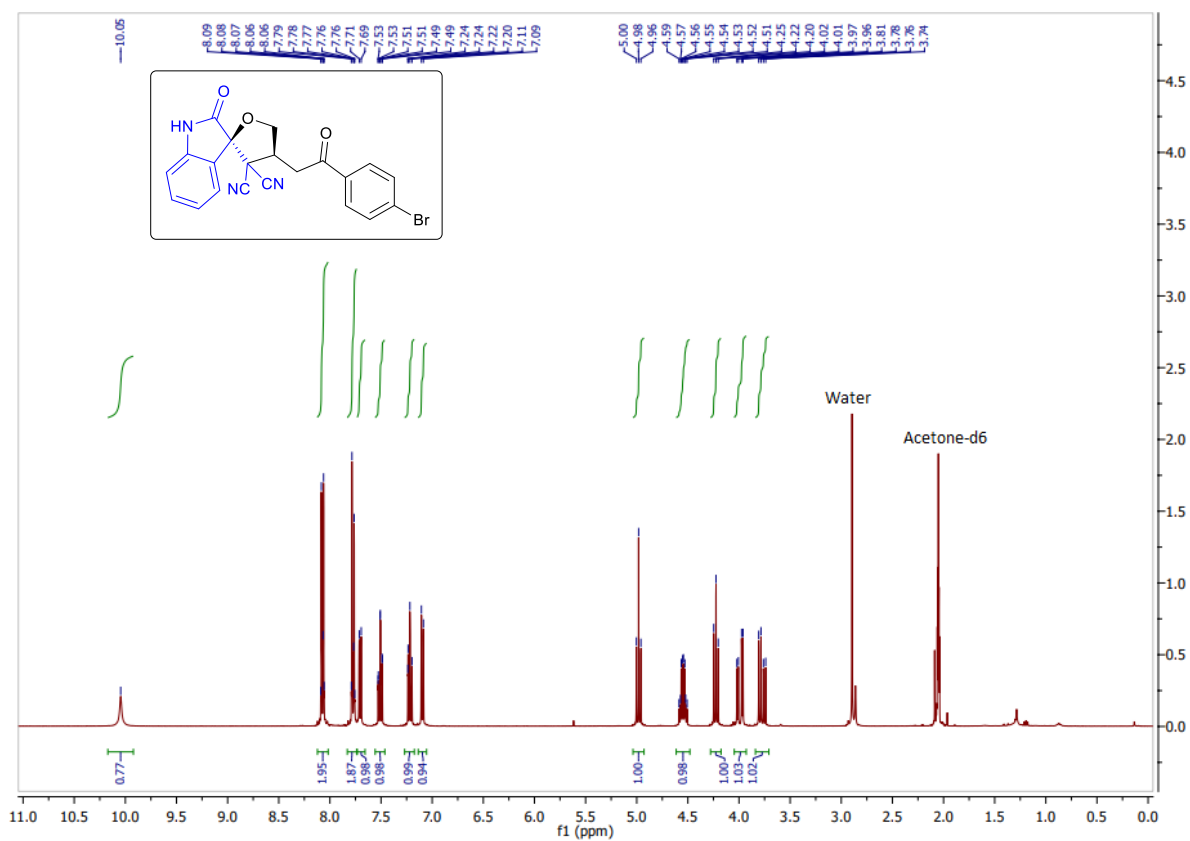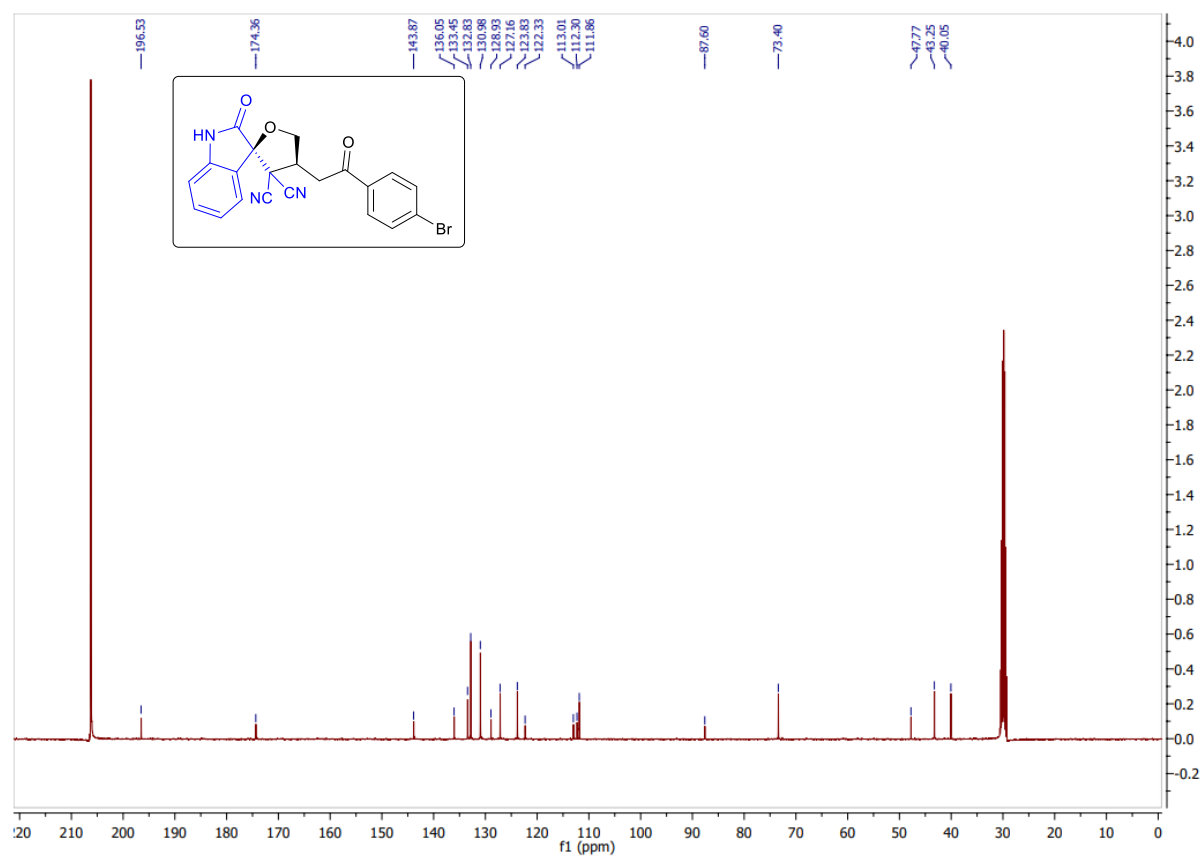

400 MHz  $^1\text{H}$  NMR and 400 MHz  $^{13}\text{C}$  NMR (Acetone- $d_6$ ) Spectra of 3ad

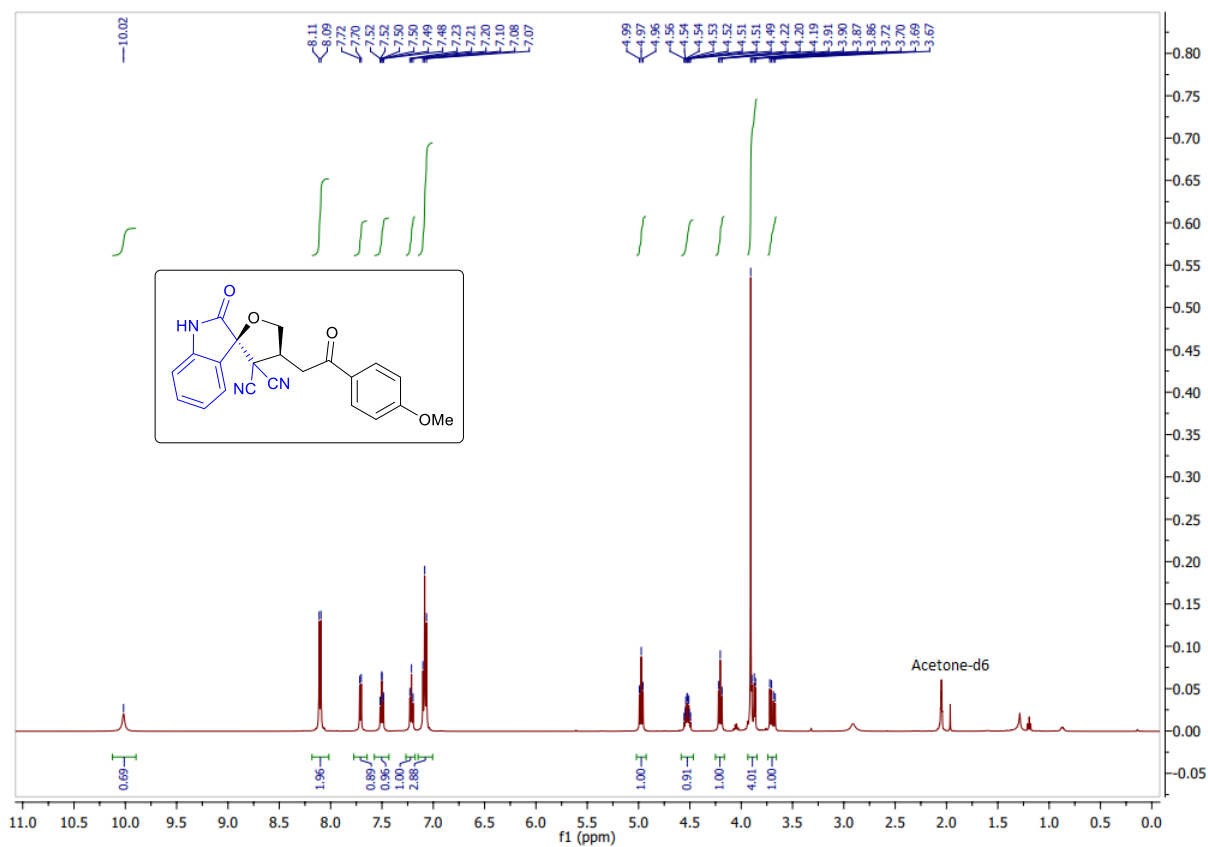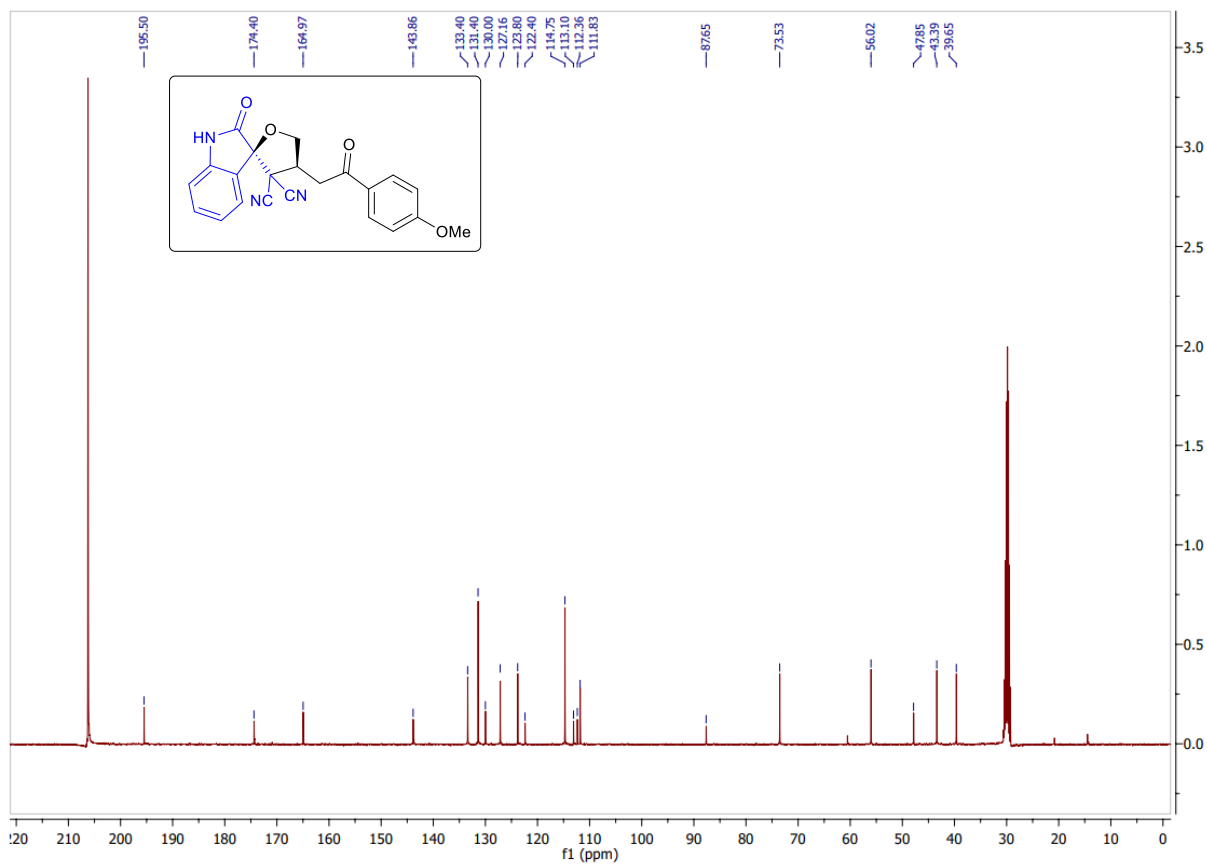

500 MHz  $^1\text{H}$  NMR and 400 MHz  $^{13}\text{C}$  NMR (Acetone- $d_6$ ) Spectra of 3ae



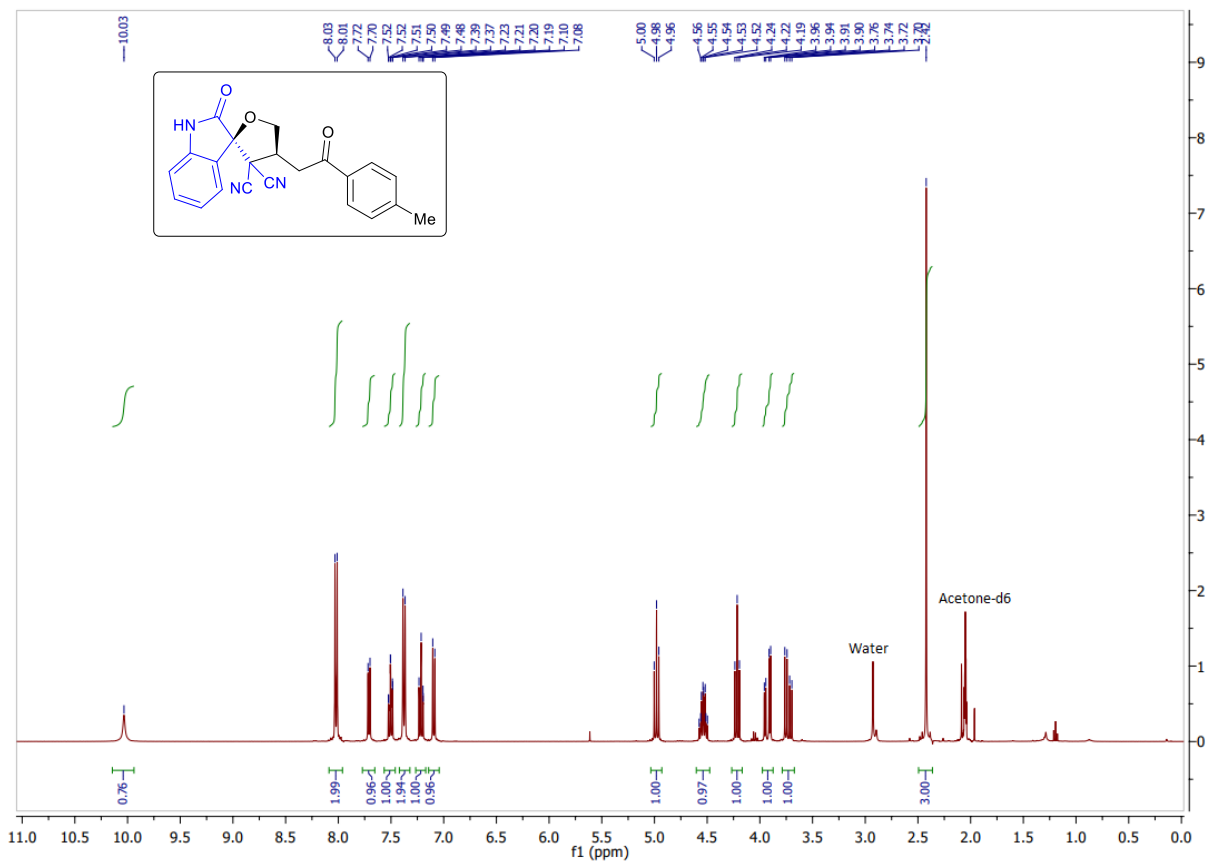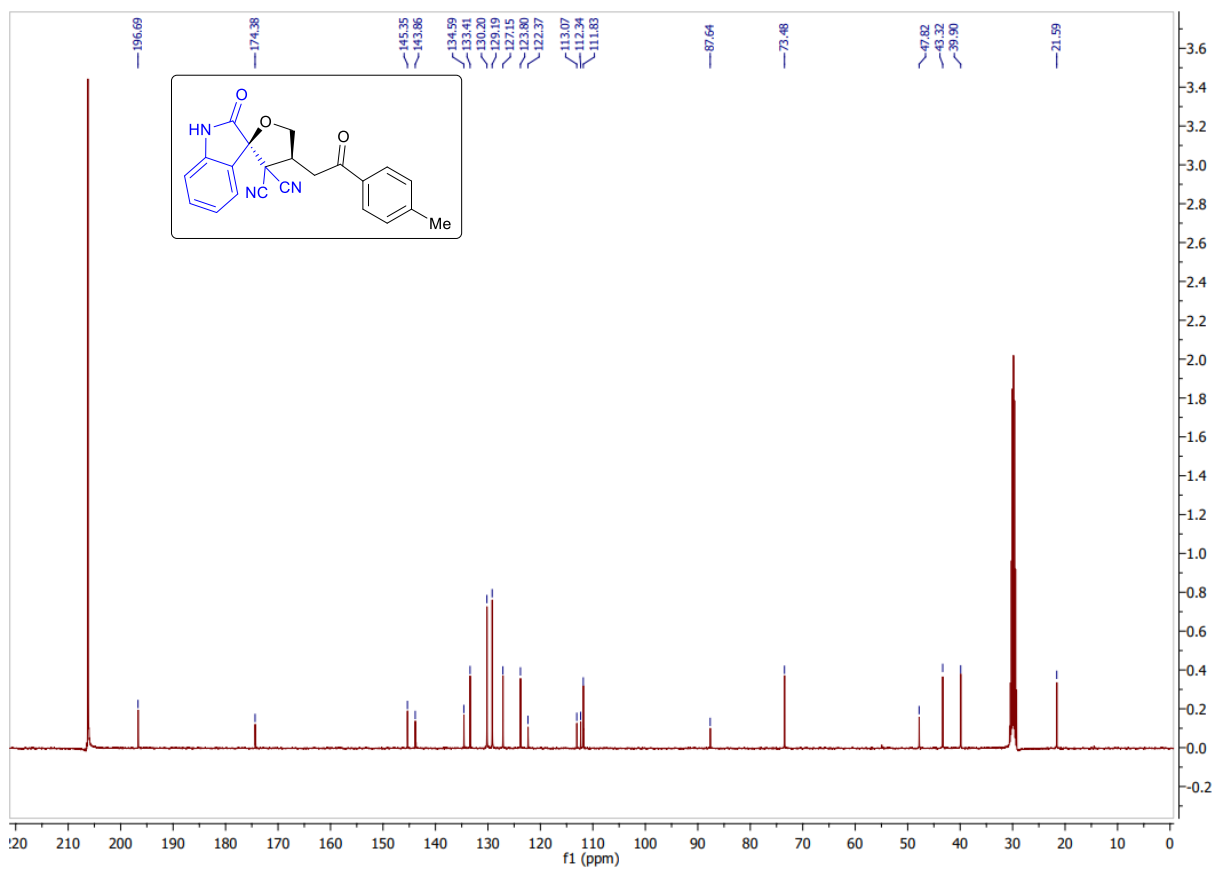

400 MHz  $^1\text{H}$  NMR and 400 MHz  $^{13}\text{C}$  NMR (Acetone- $d_6$ ) Spectra of 3af

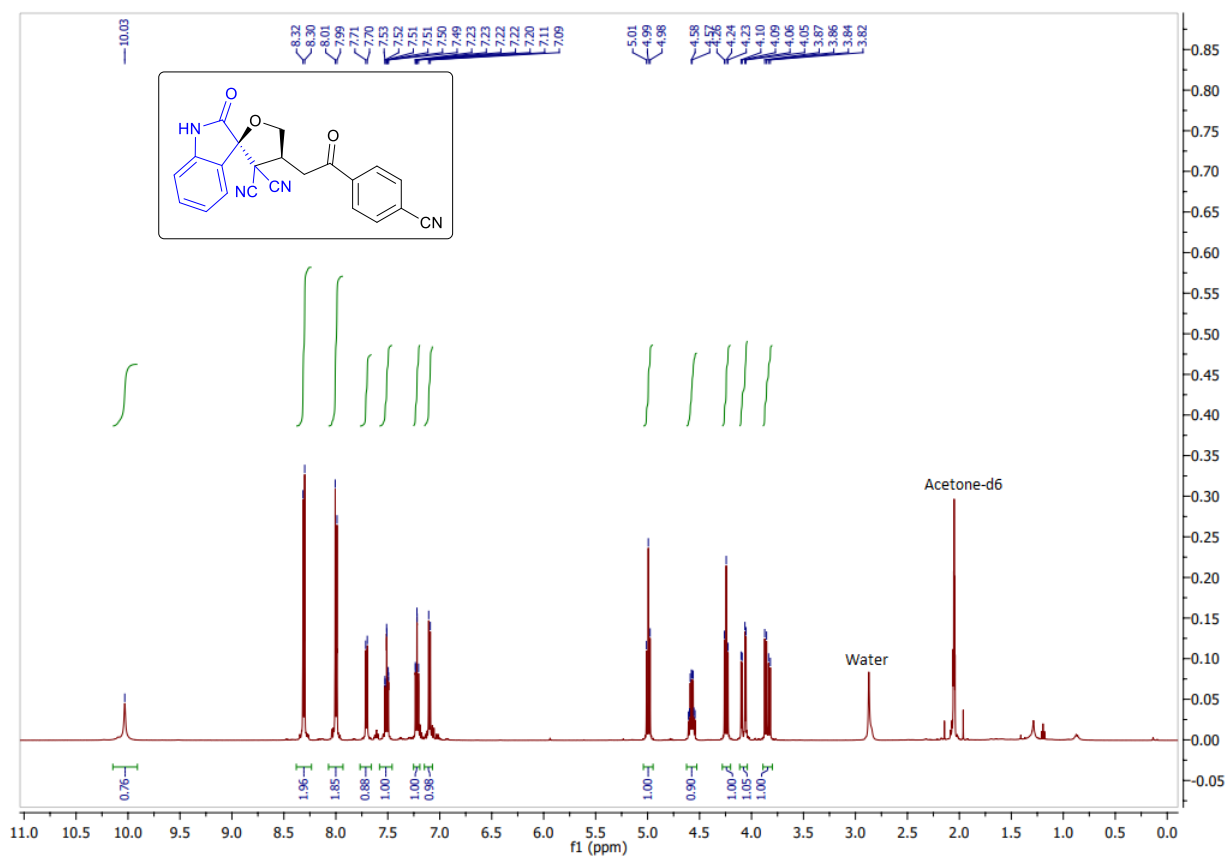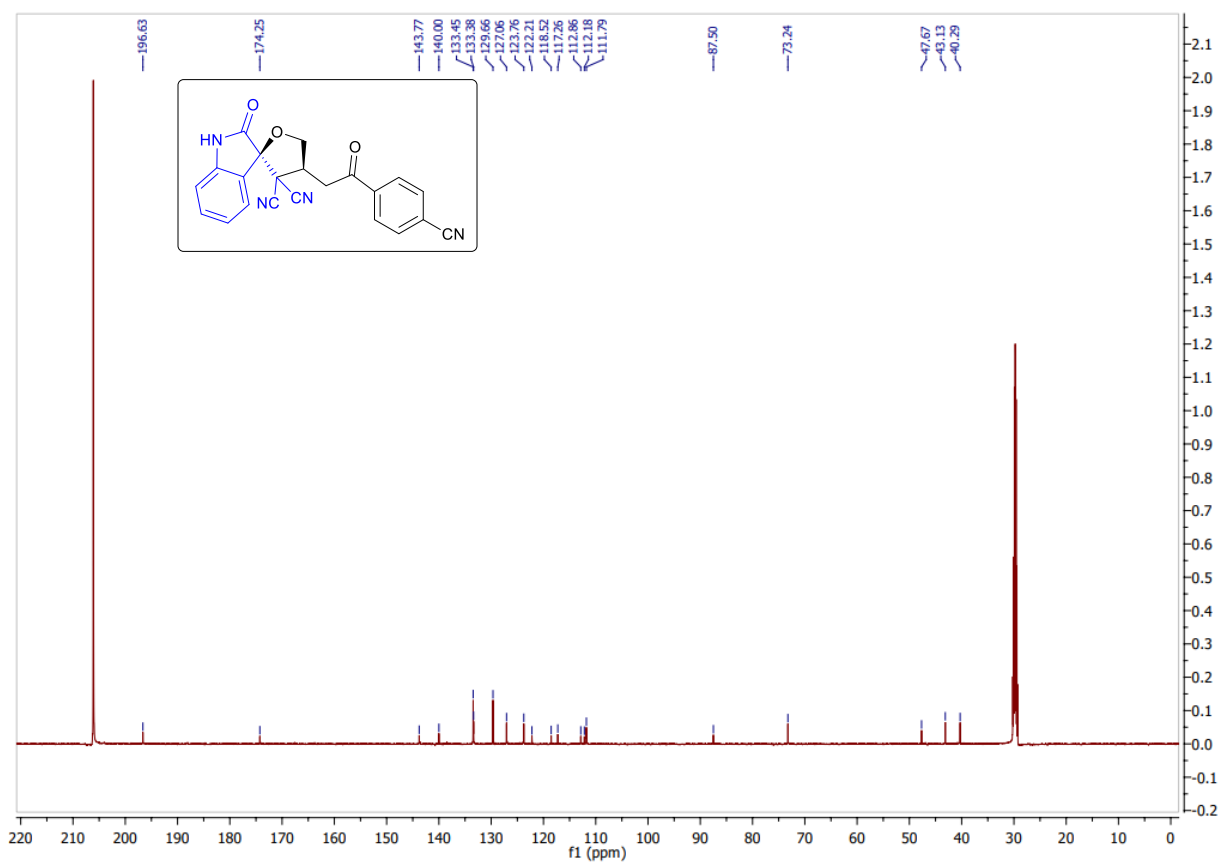

500 MHz  $^1\text{H}$  NMR and 500 MHz  $^{13}\text{C}$  NMR (Acetone- $d_6$ ) Spectra of 3ag

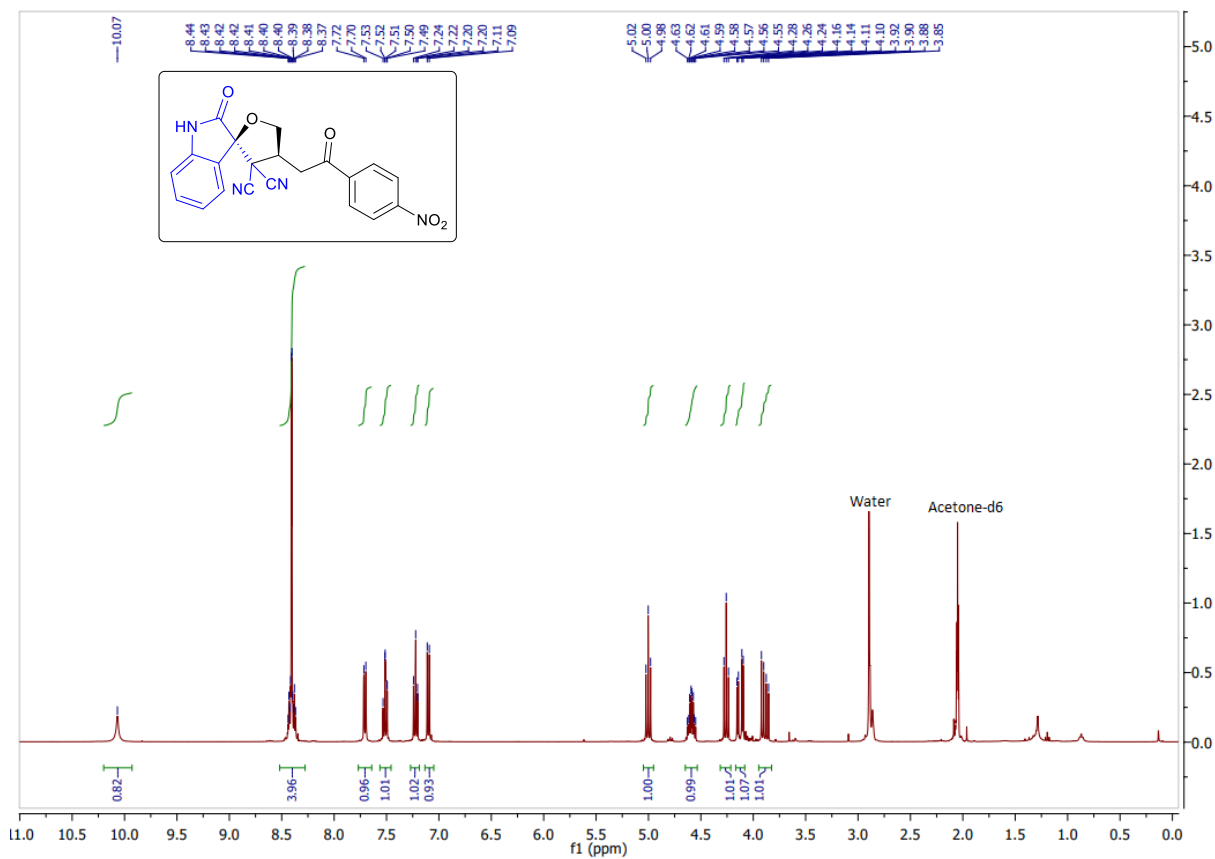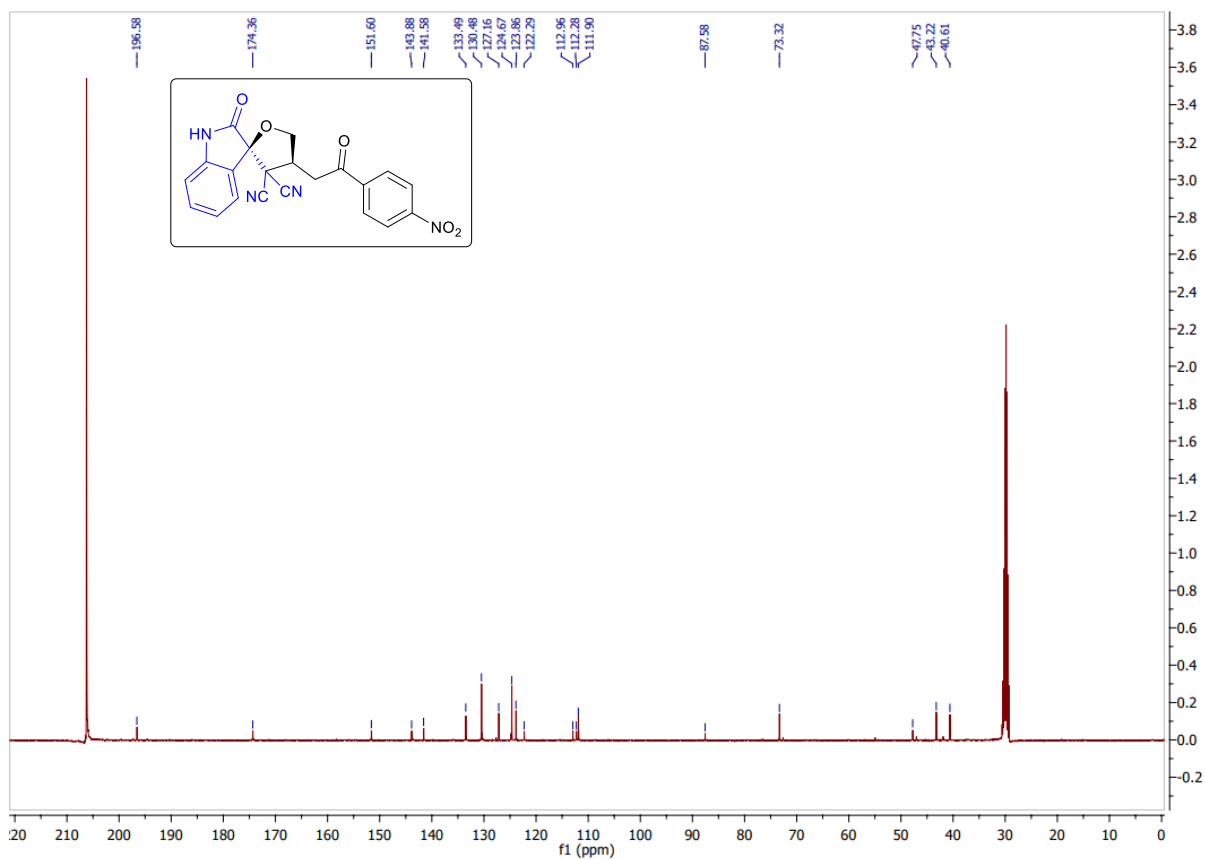

400 MHz  $^1\text{H}$  NMR and 400 MHz  $^{13}\text{C}$  NMR (Acetone- $d_6$ ) Spectra of 3ah

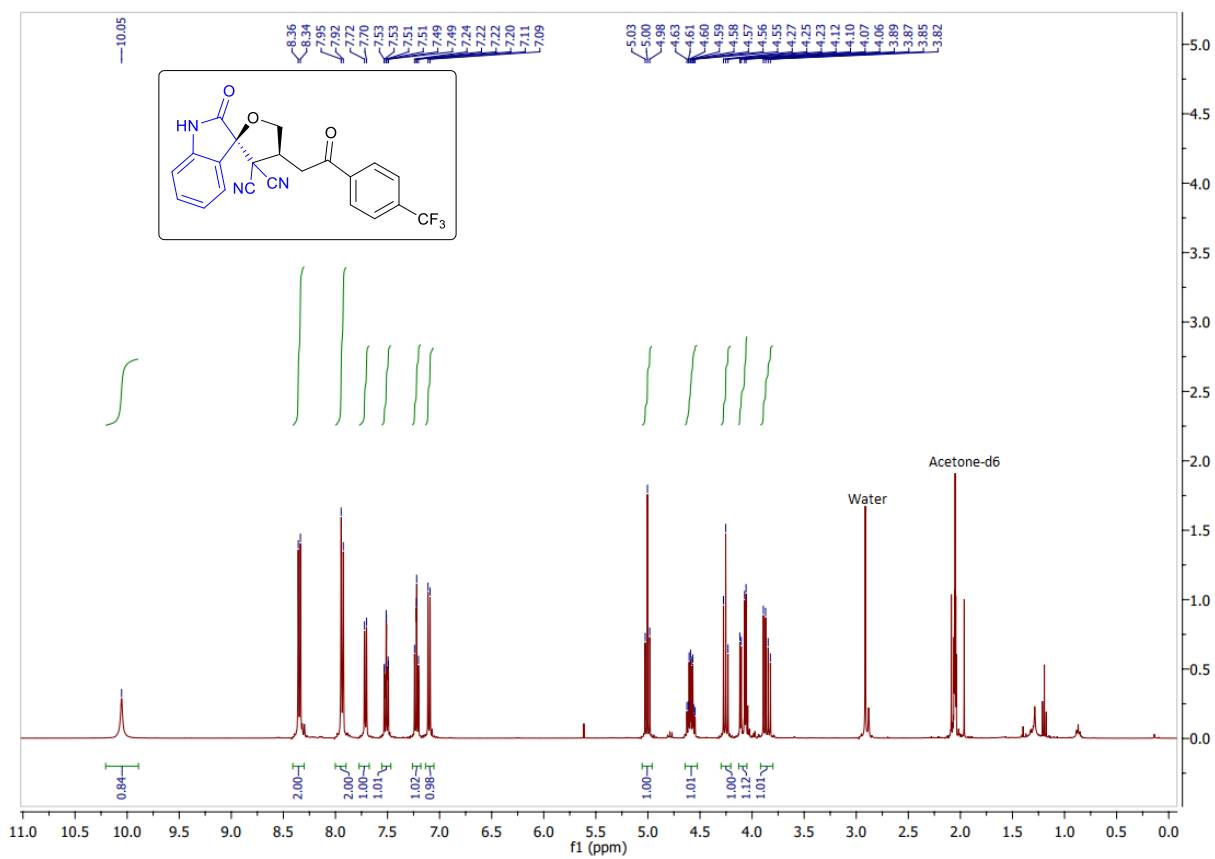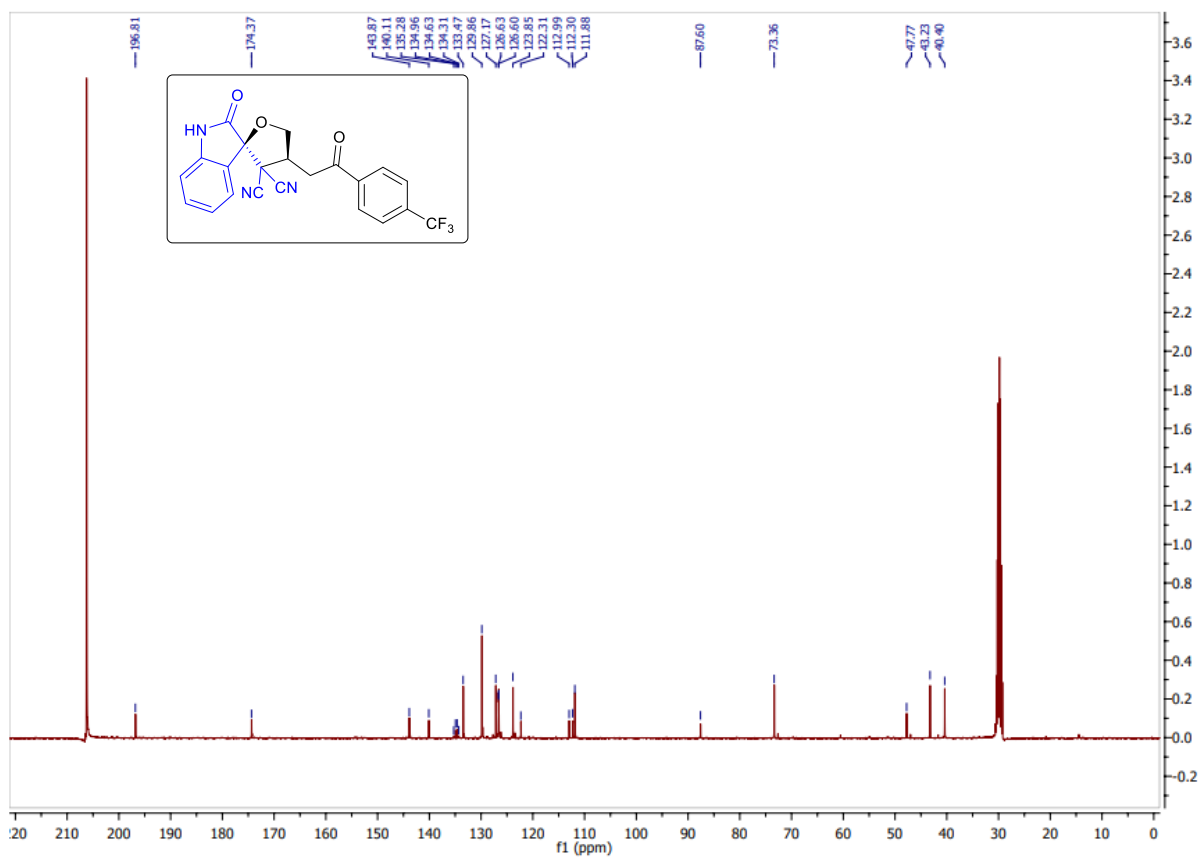

400 MHz <sup>1</sup>H NMR and 400 MHz <sup>13</sup>C NMR (Acetone-d<sub>6</sub>) Spectra of 3ai

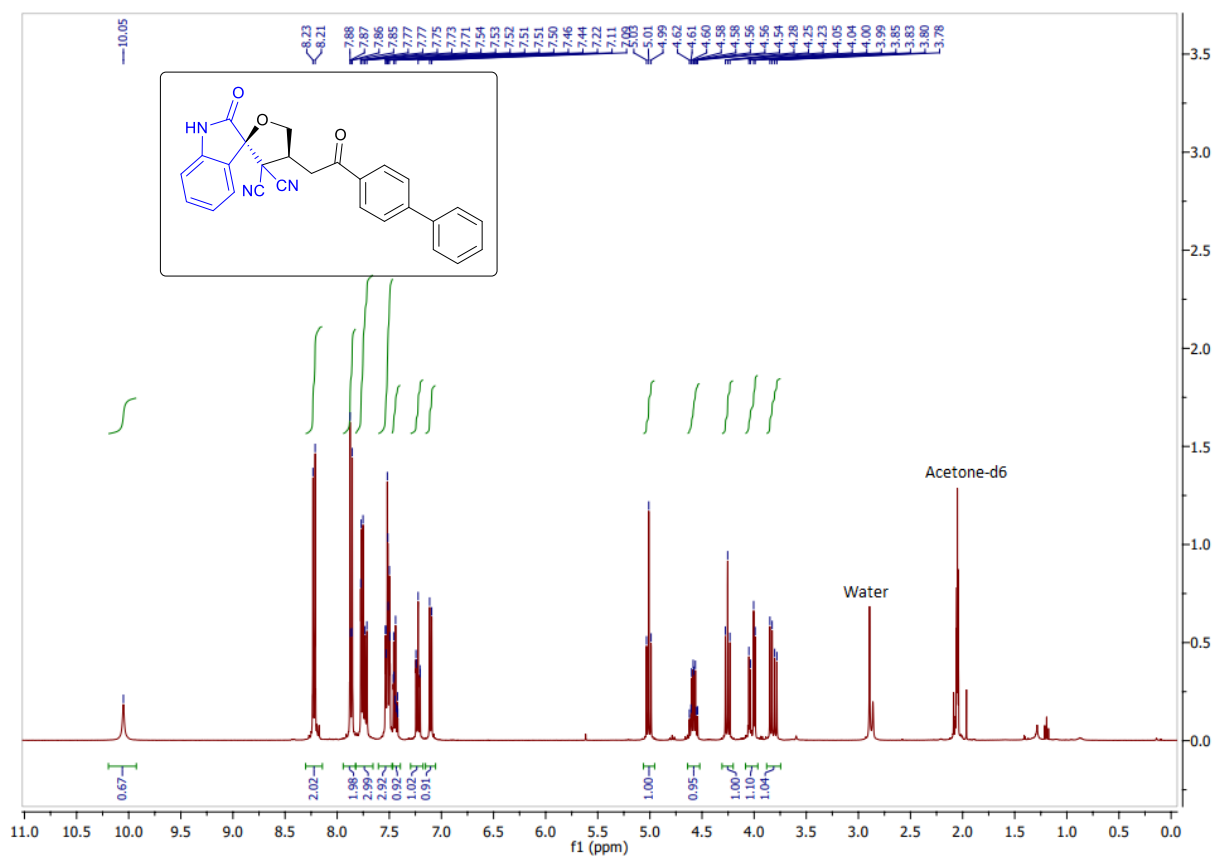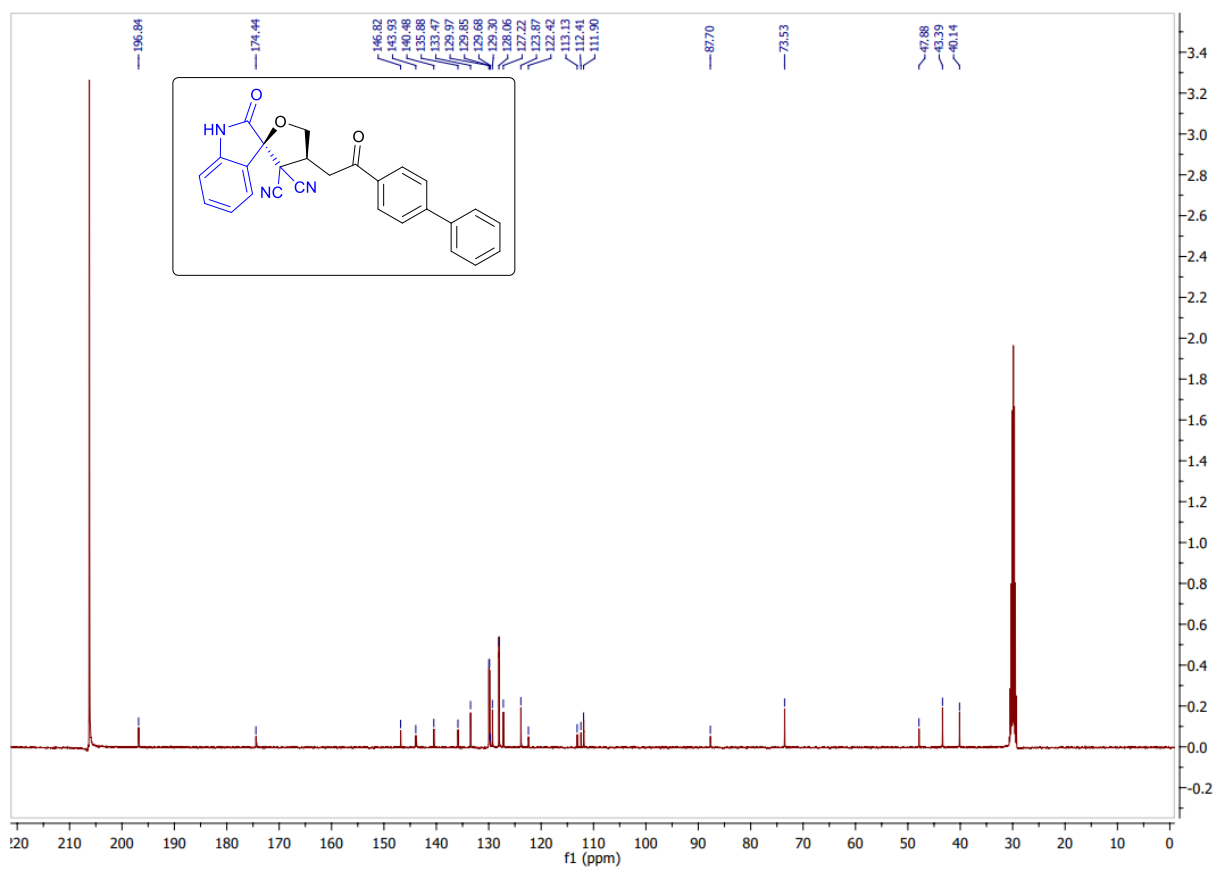

400 MHz  $^1\text{H}$  NMR and 400 MHz  $^{13}\text{C}$  NMR (Acetone- $d_6$ ) Spectra of 3aj

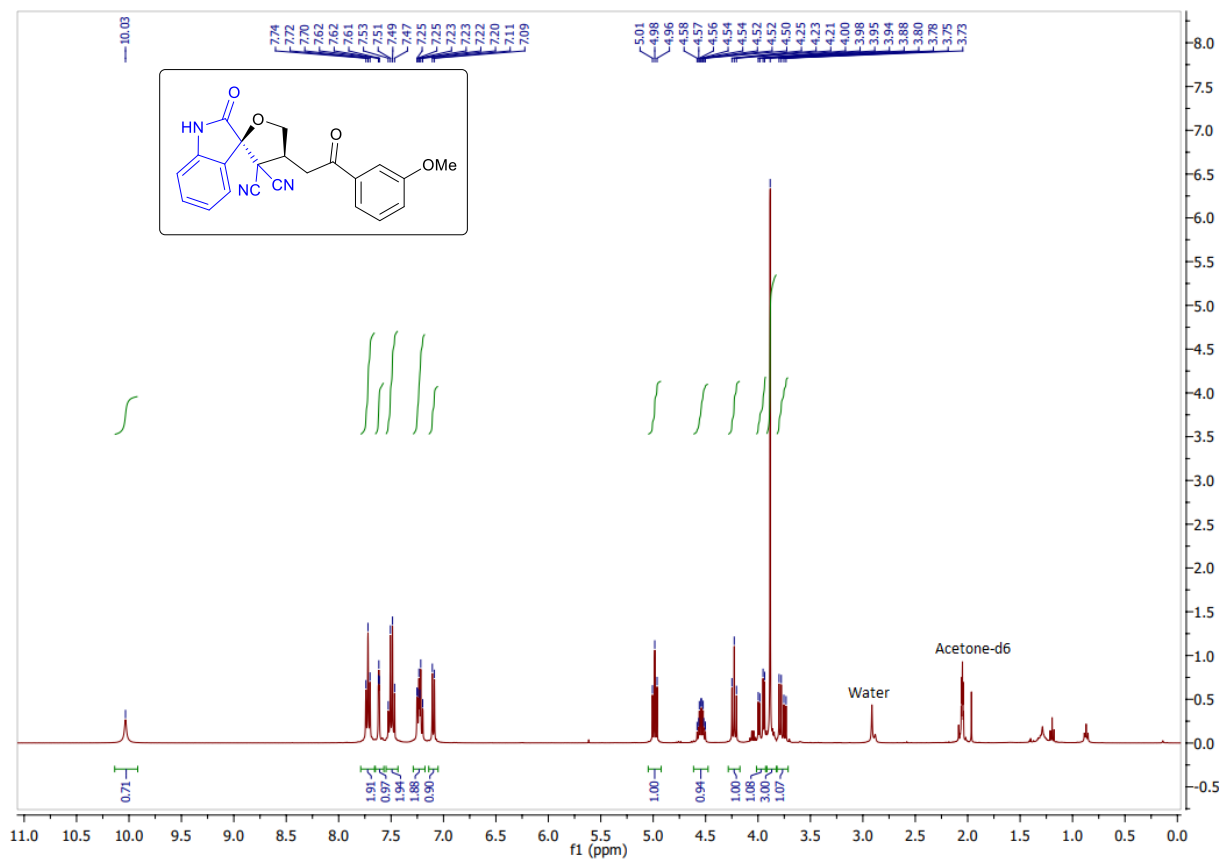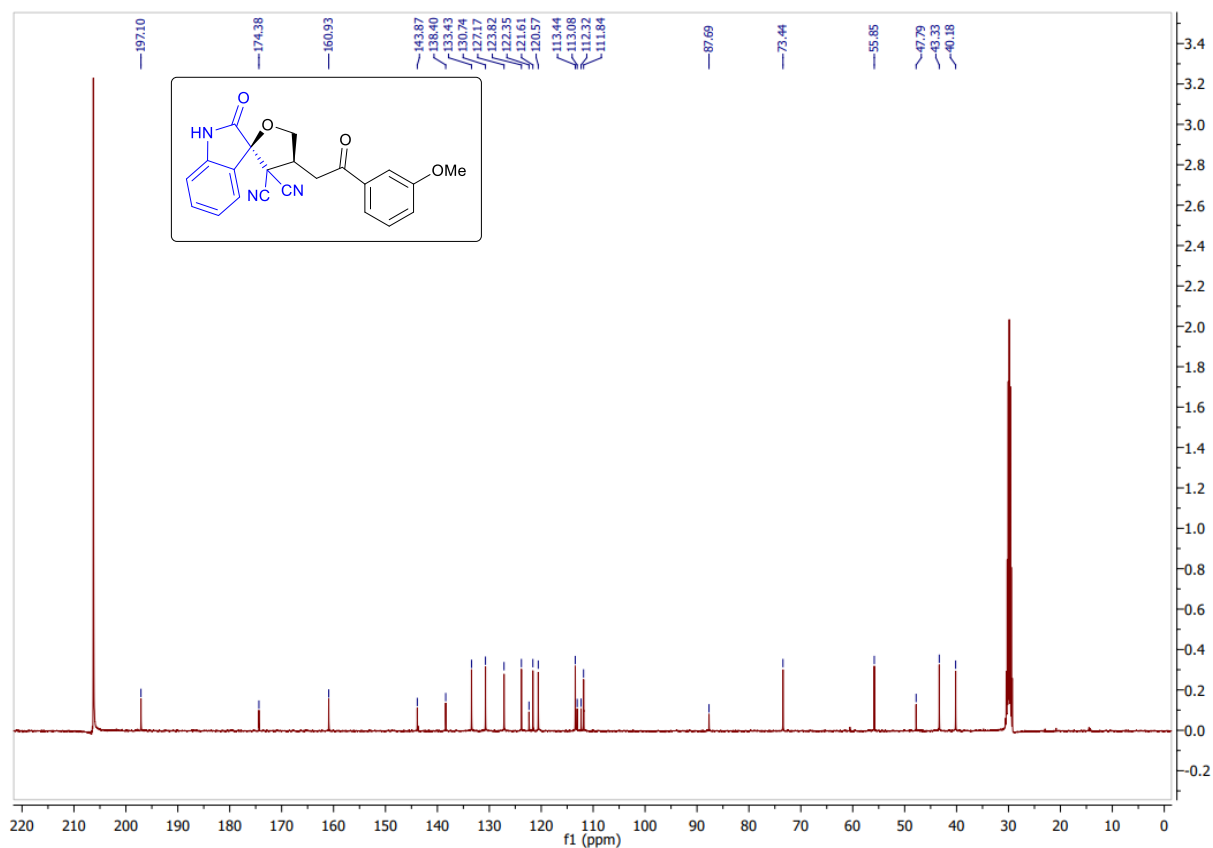

400 MHz  $^1\text{H}$  NMR and 400 MHz  $^{13}\text{C}$  NMR (Acetone- $d_6$ ) Spectra of 3ak

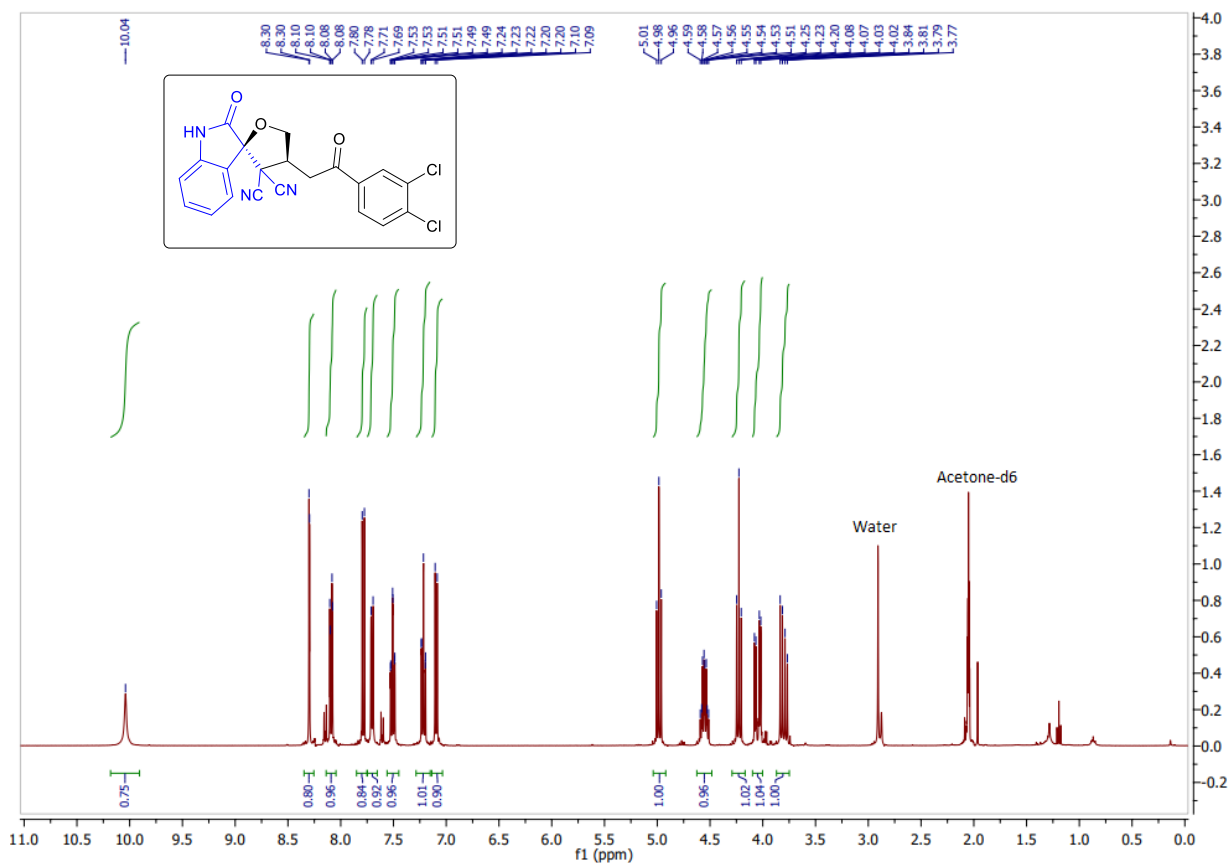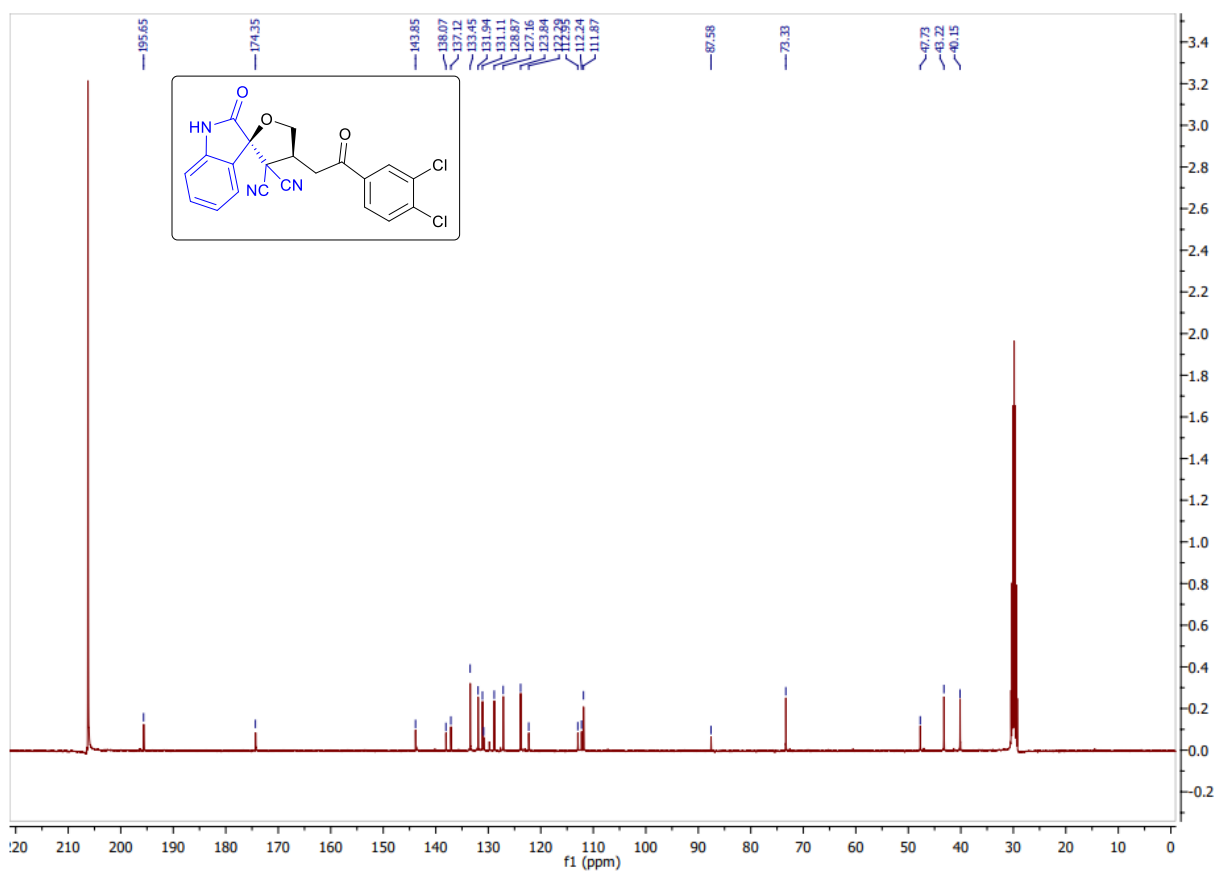

400 MHz <sup>1</sup>H NMR and 400 MHz <sup>13</sup>C NMR (Acetone-d<sub>6</sub>) Spectra of 3aI

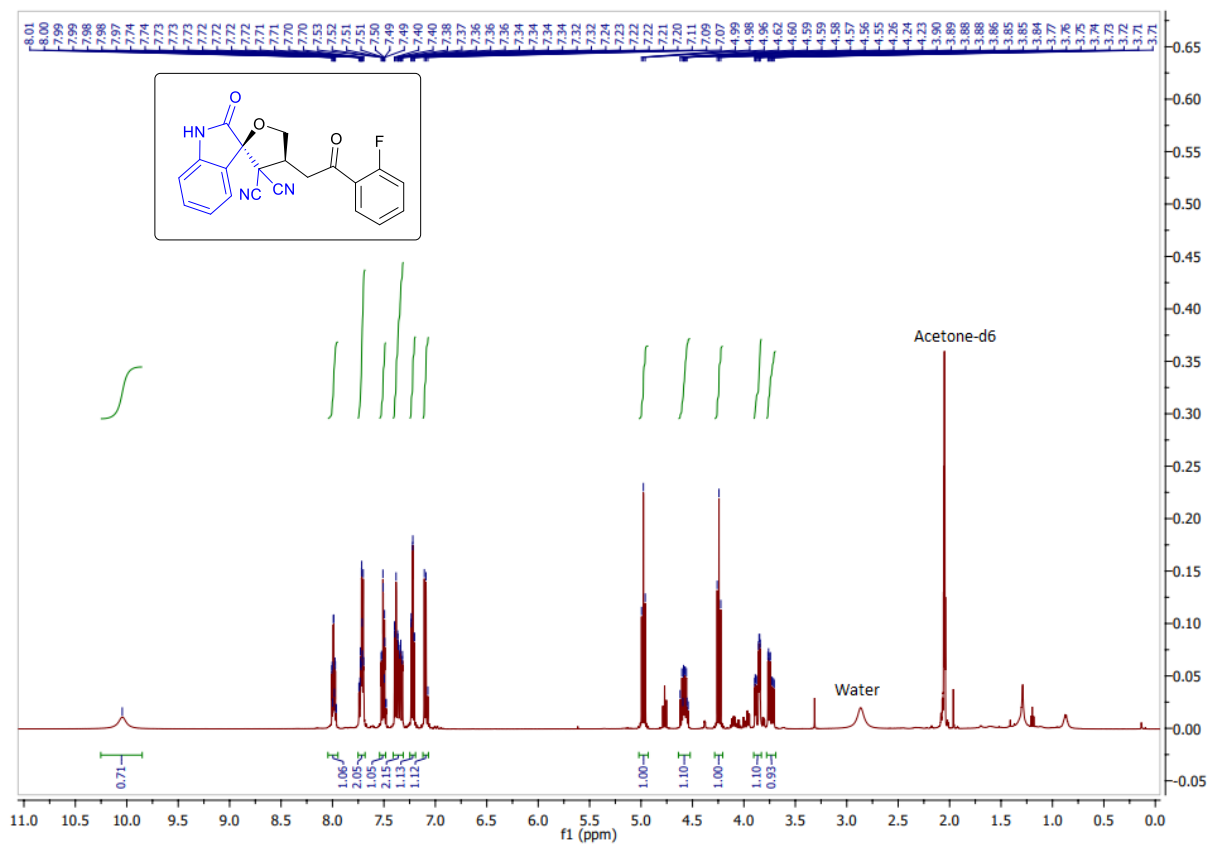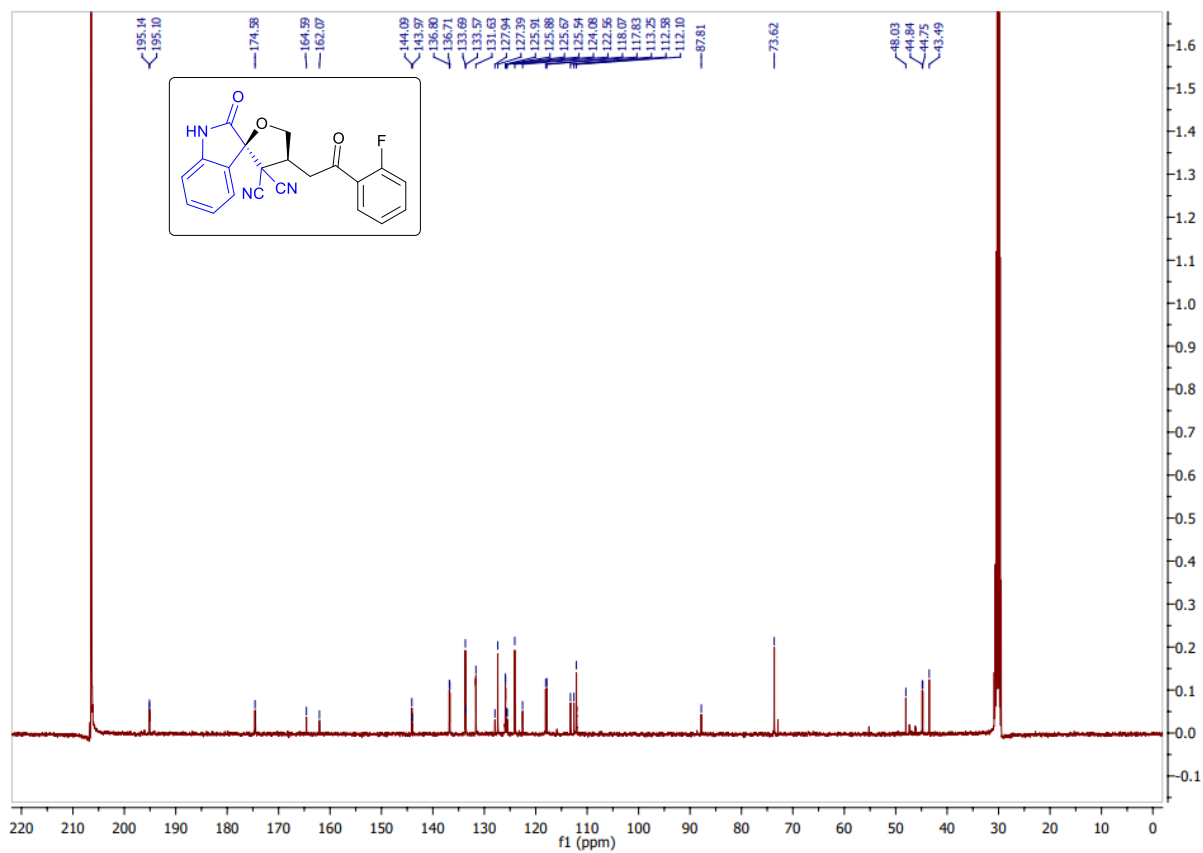

500 MHz  $^1\text{H}$  NMR and 400 MHz  $^{13}\text{C}$  NMR (Acetone- $\text{d}_6$ ) Spectra of 3am



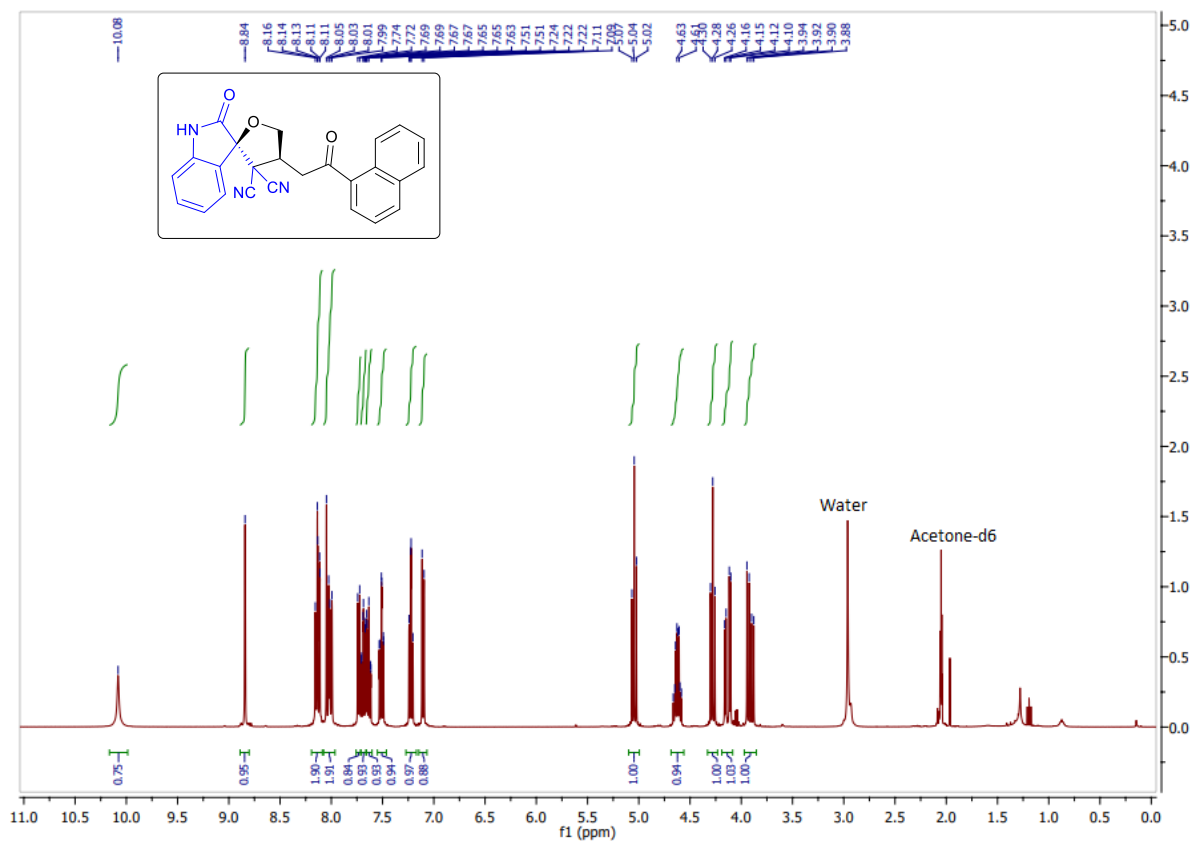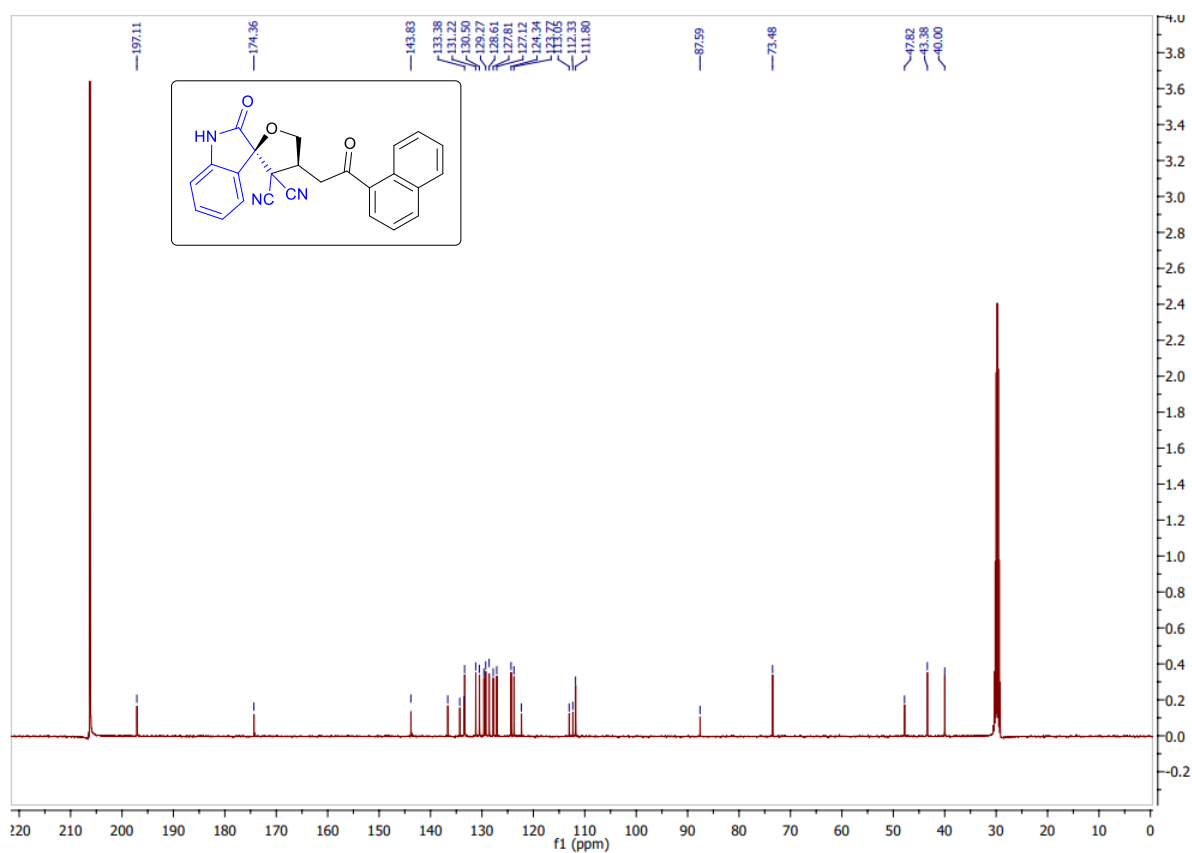

400 MHz  $^1\text{H}$  NMR and 400 MHz  $^{13}\text{C}$  NMR (Acetone- $d_6$ ) Spectra of 3an

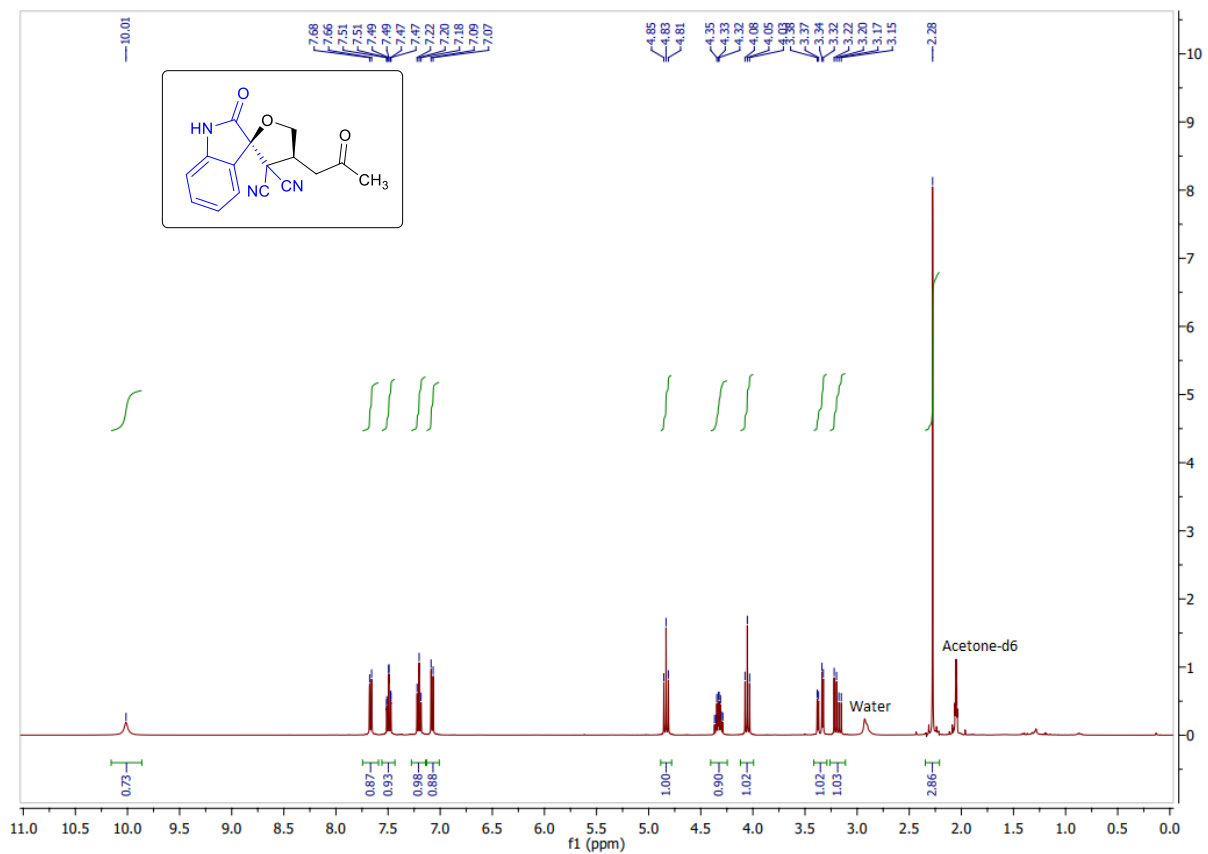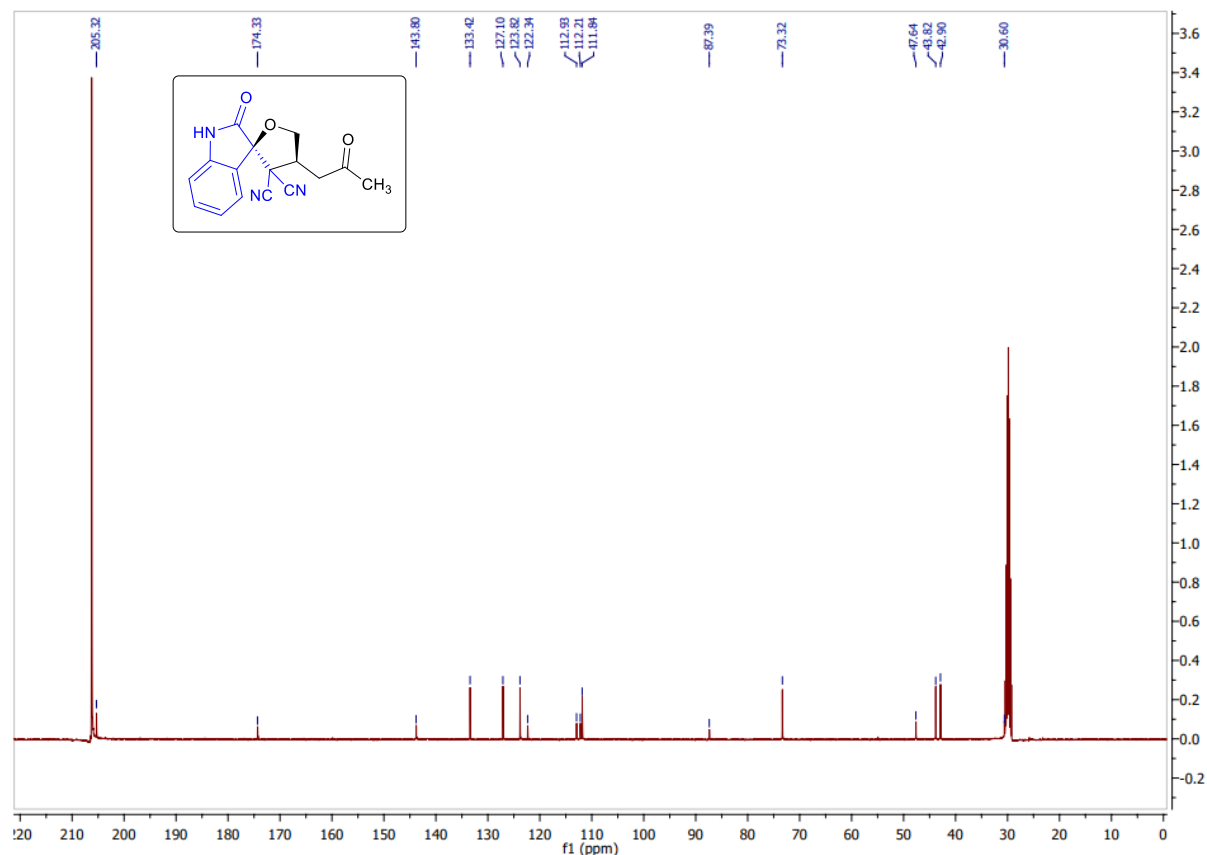

400 MHz <sup>1</sup>H NMR and 400 MHz <sup>13</sup>C NMR (Acetone-d<sub>6</sub>) Spectra of 3ao

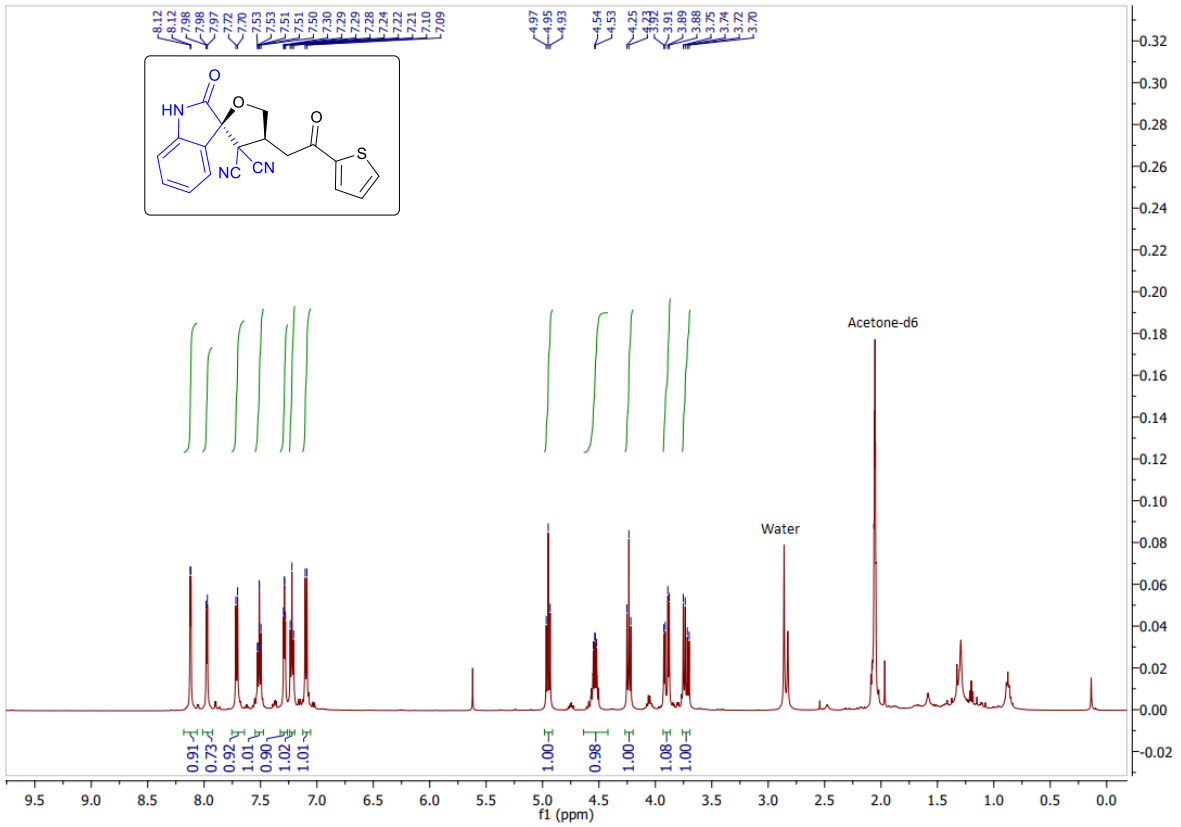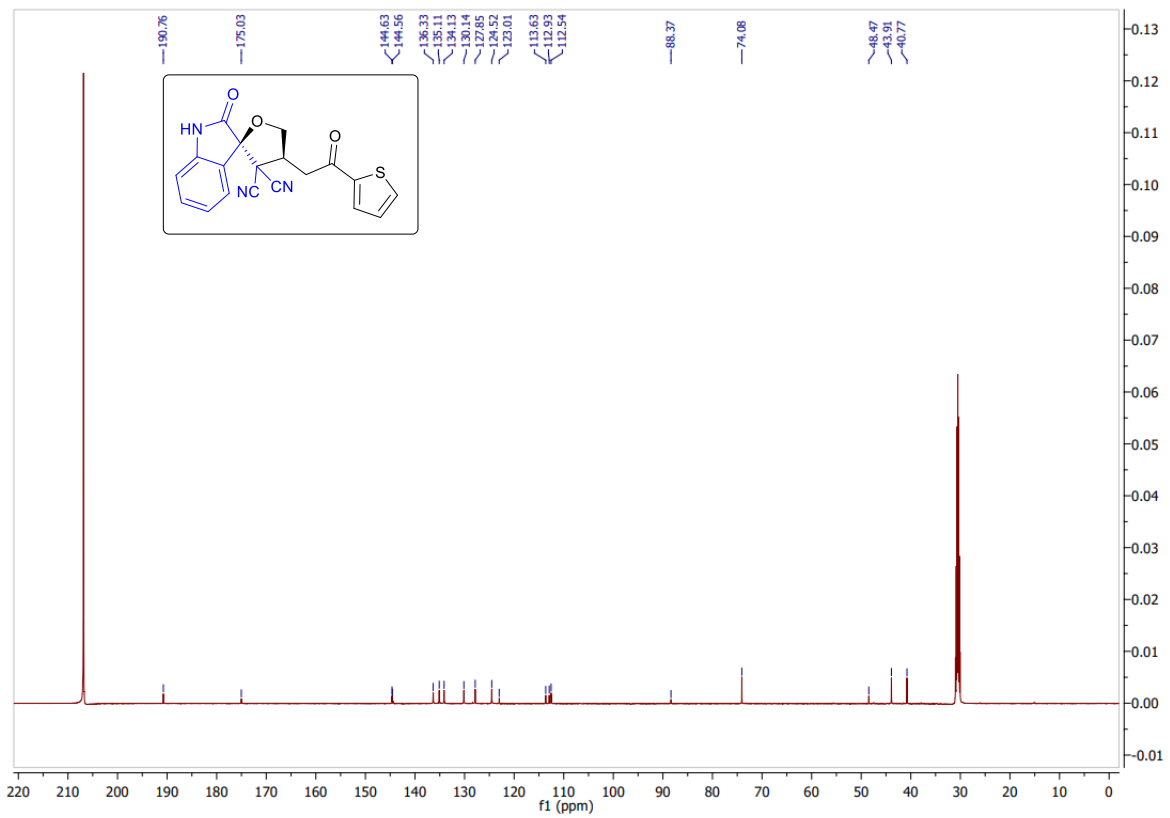

500 MHz  $^1\text{H}$  NMR and 500 MHz  $^{13}\text{C}$  NMR (Acetone- $d_6$ ) Spectra of 3ap

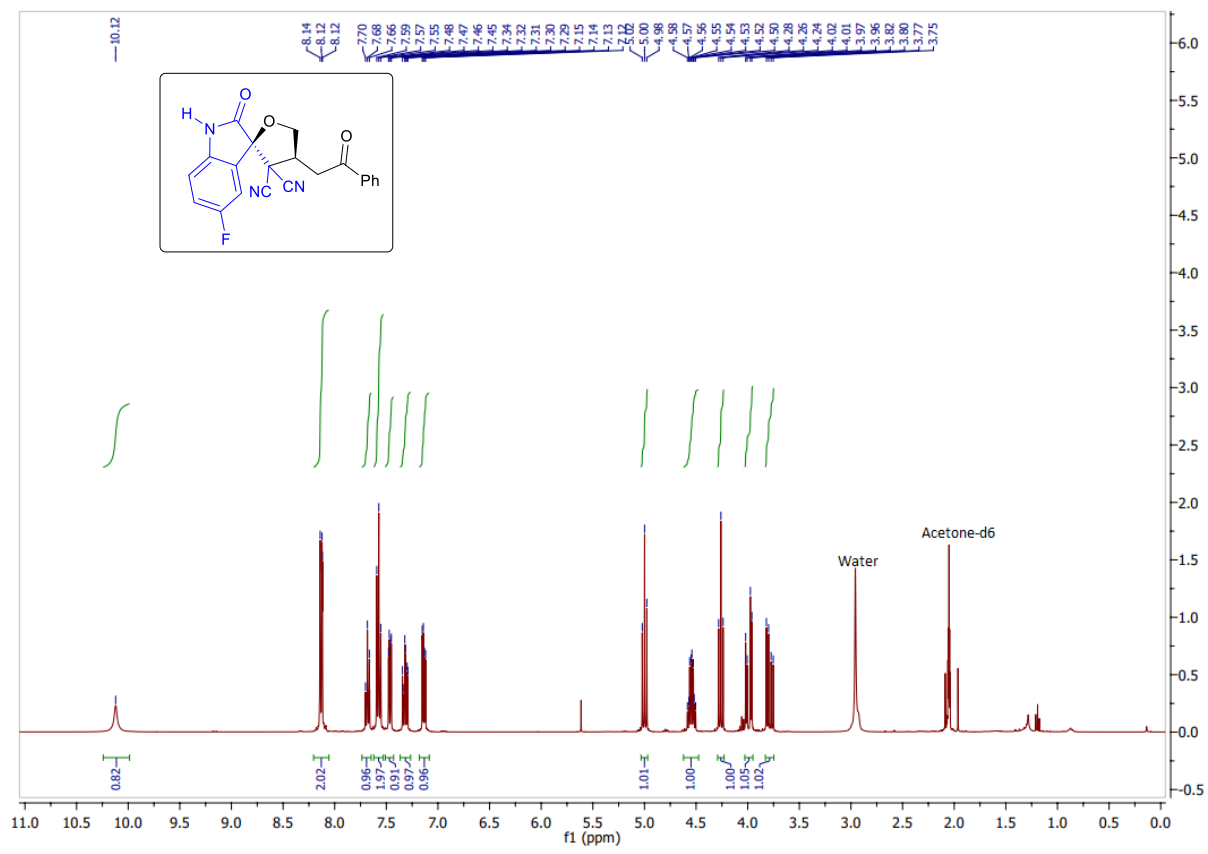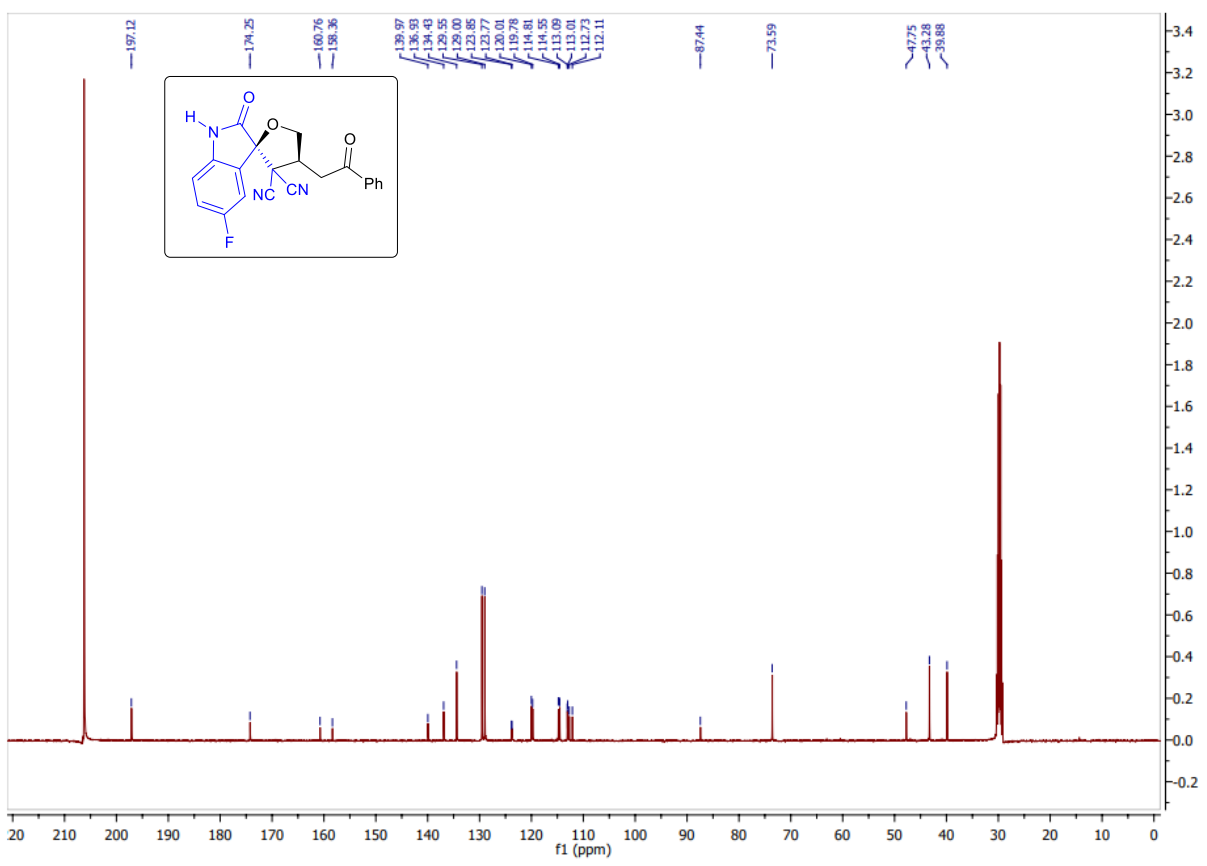

400 MHz <sup>1</sup>H NMR and 400 MHz <sup>13</sup>C NMR (Acetone-d<sub>6</sub>) Spectra of 3ba

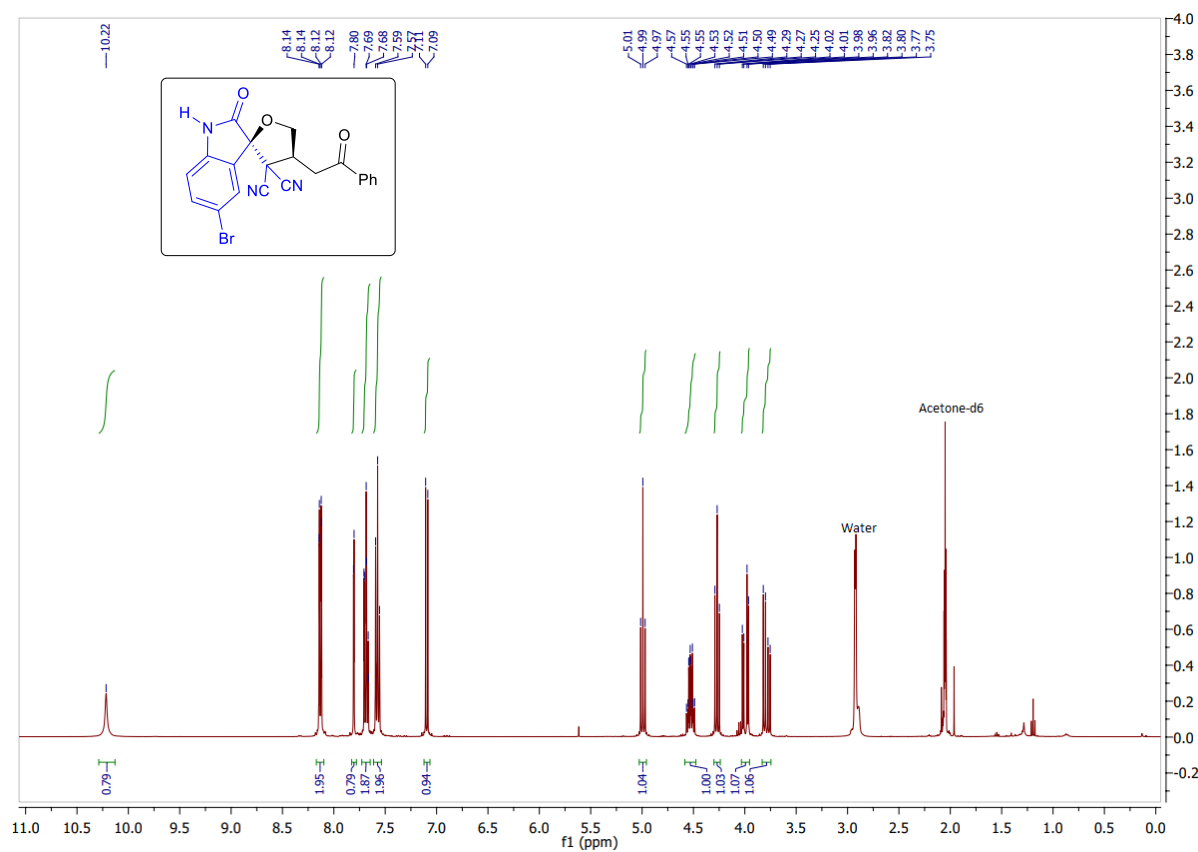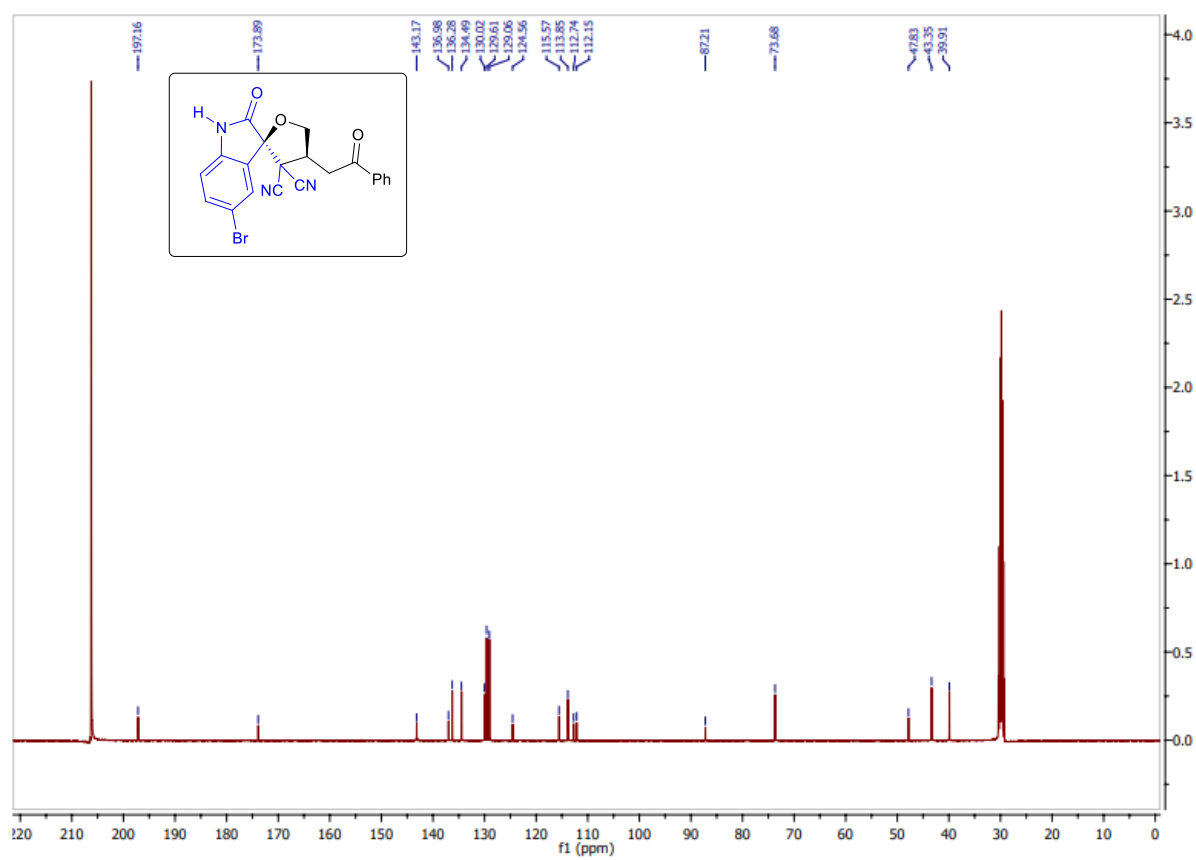

400 MHz <sup>1</sup>H NMR and 400 MHz <sup>13</sup>C NMR (Acetone-d<sub>6</sub>) Spectra of 3ca

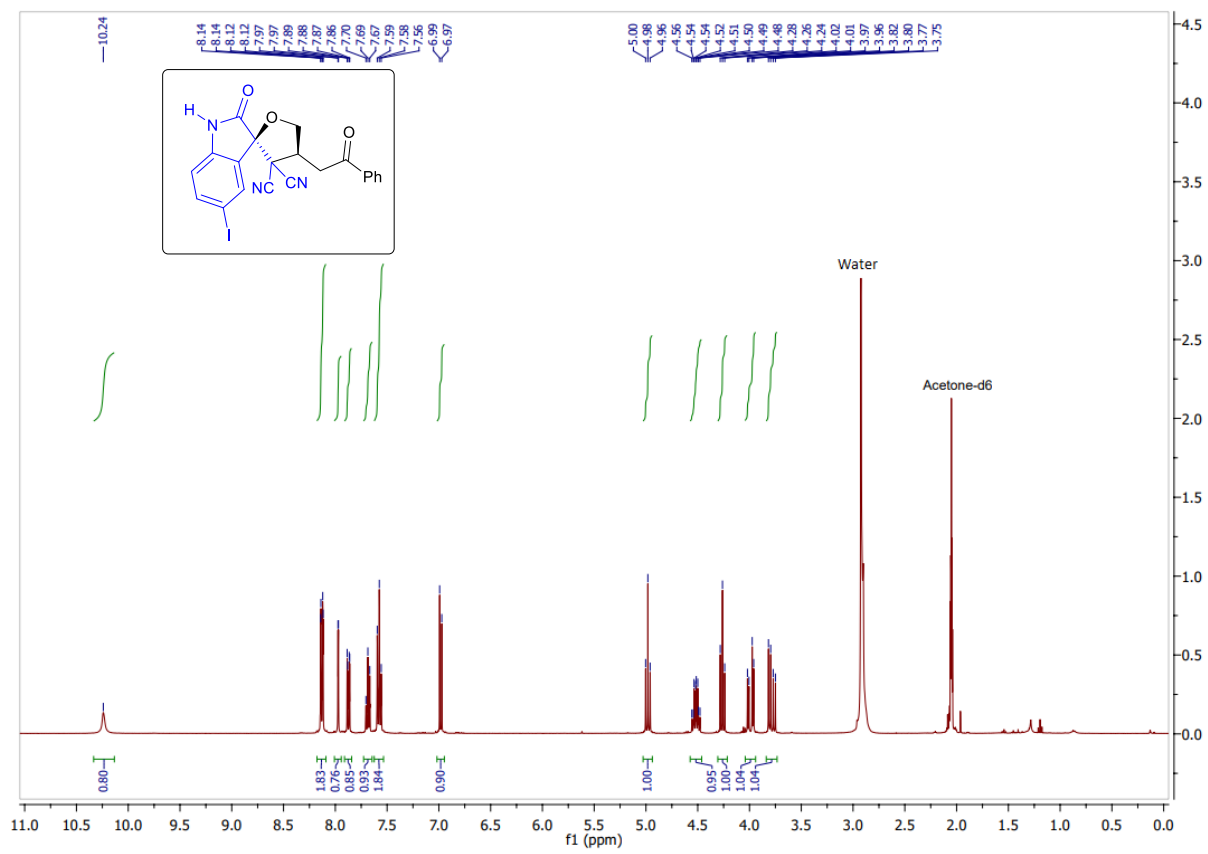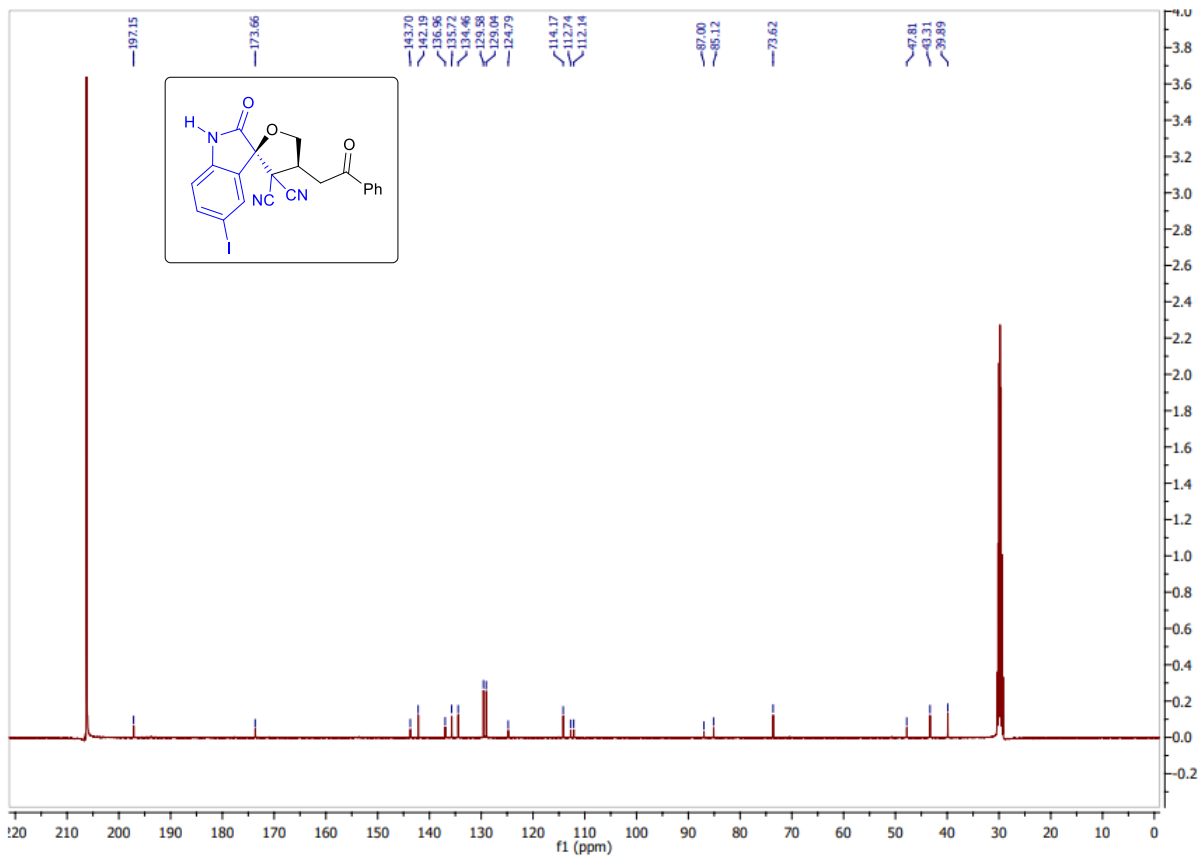

400 MHz <sup>1</sup>H NMR and 400 MHz <sup>13</sup>C NMR (Acetone-d6) Spectra of 3da

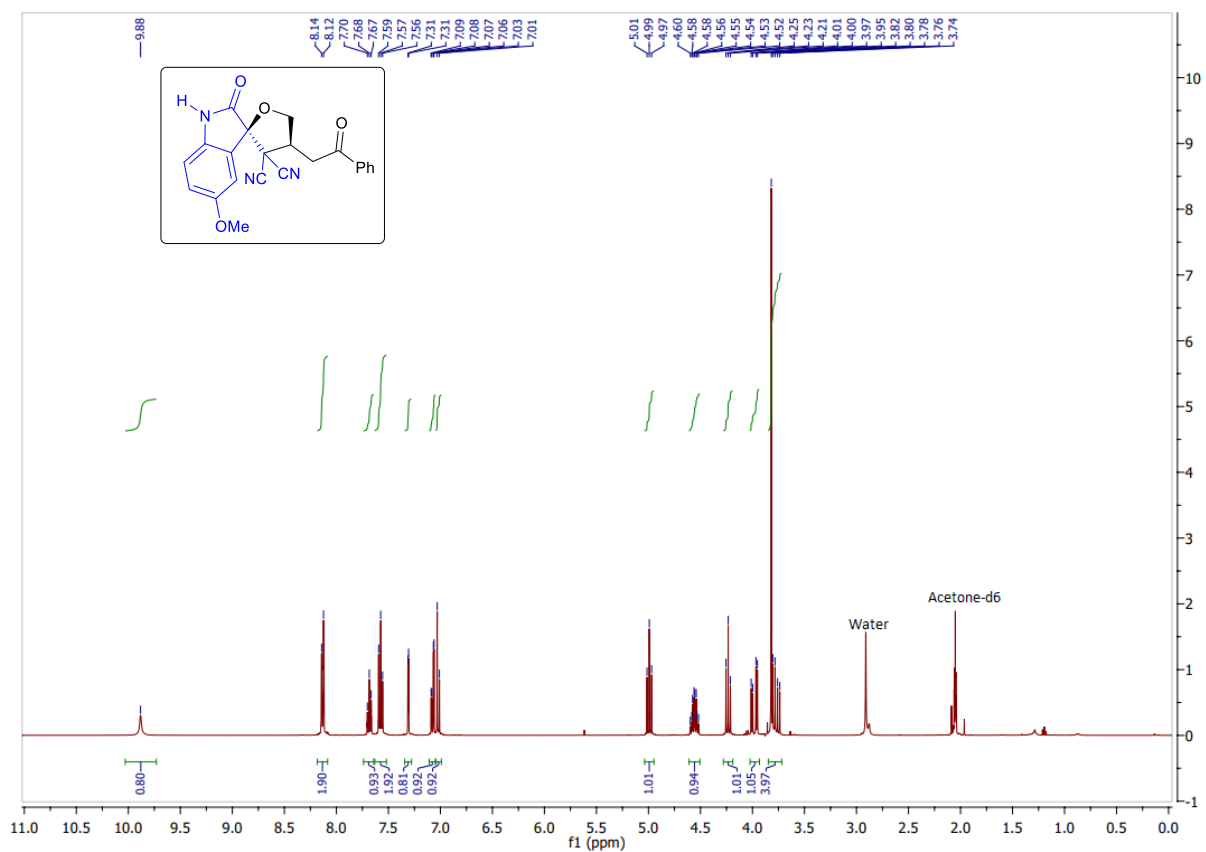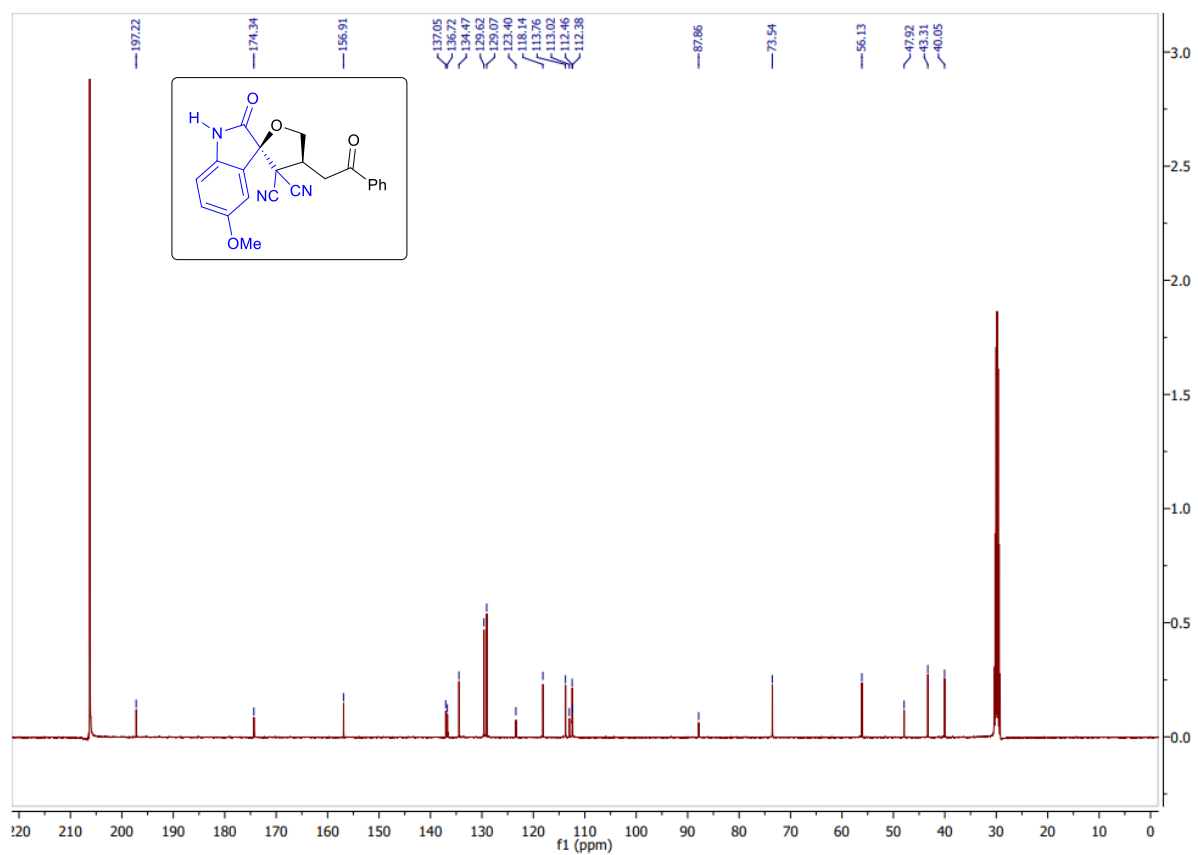

400 MHz  $^1\text{H}$  NMR and 400 MHz  $^{13}\text{C}$  NMR (Acetone- $d_6$ ) Spectra of 3ea

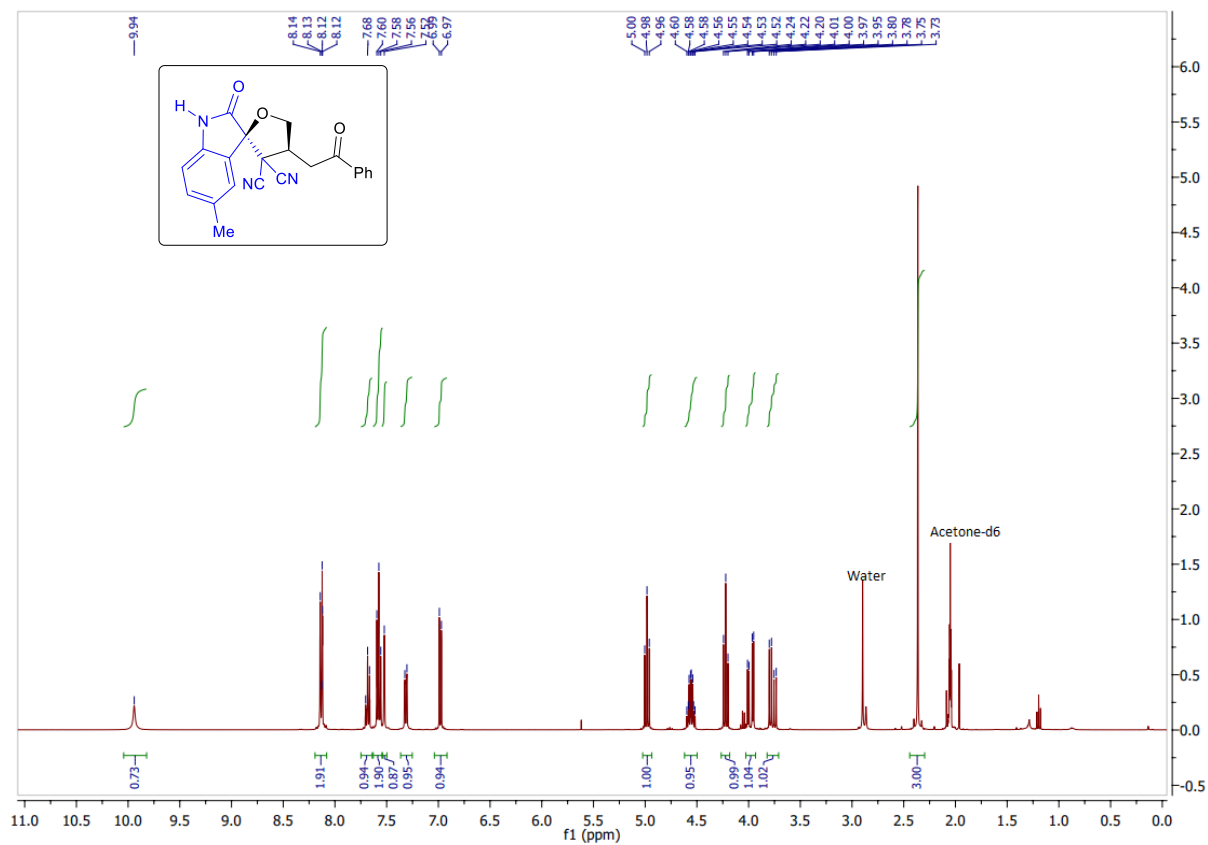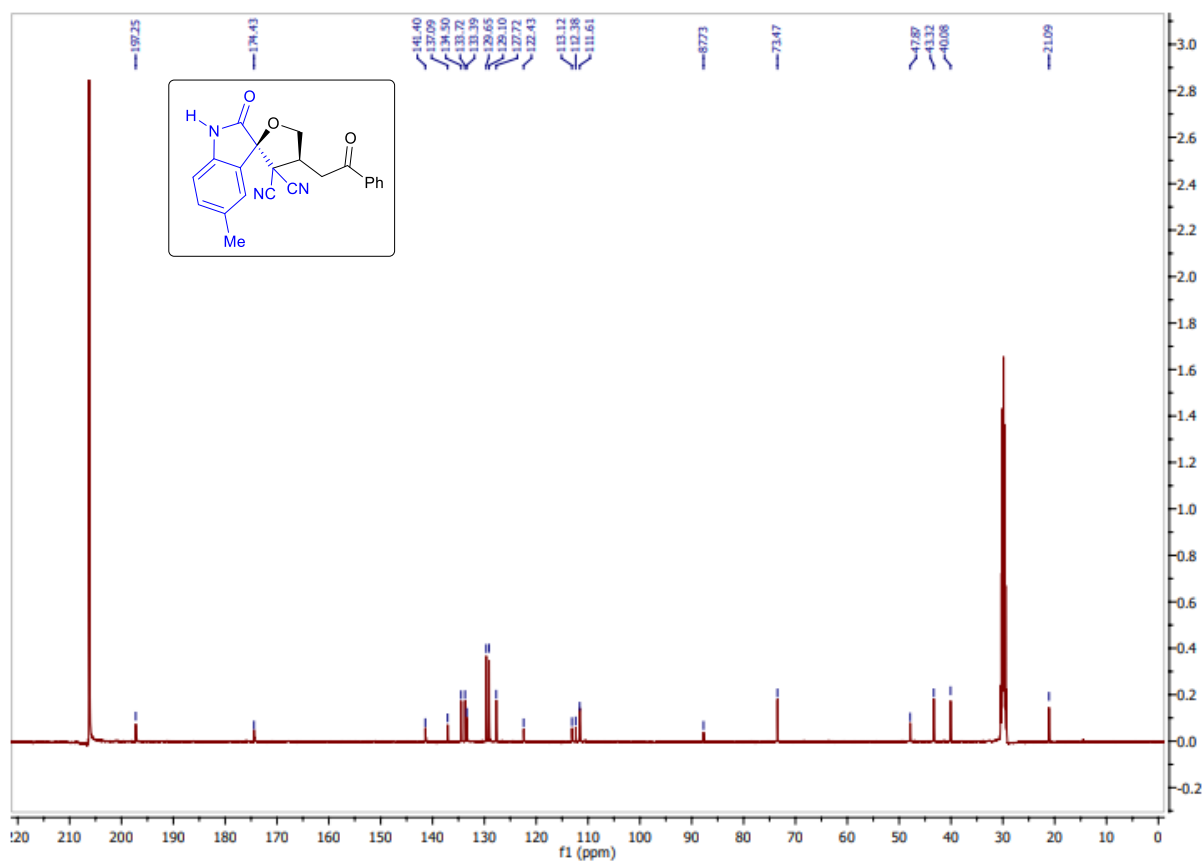

400 MHz  $^1\text{H}$  NMR and 400 MHz  $^{13}\text{C}$  NMR (Acetone- $\text{d}_6$ ) Spectra of 3fa



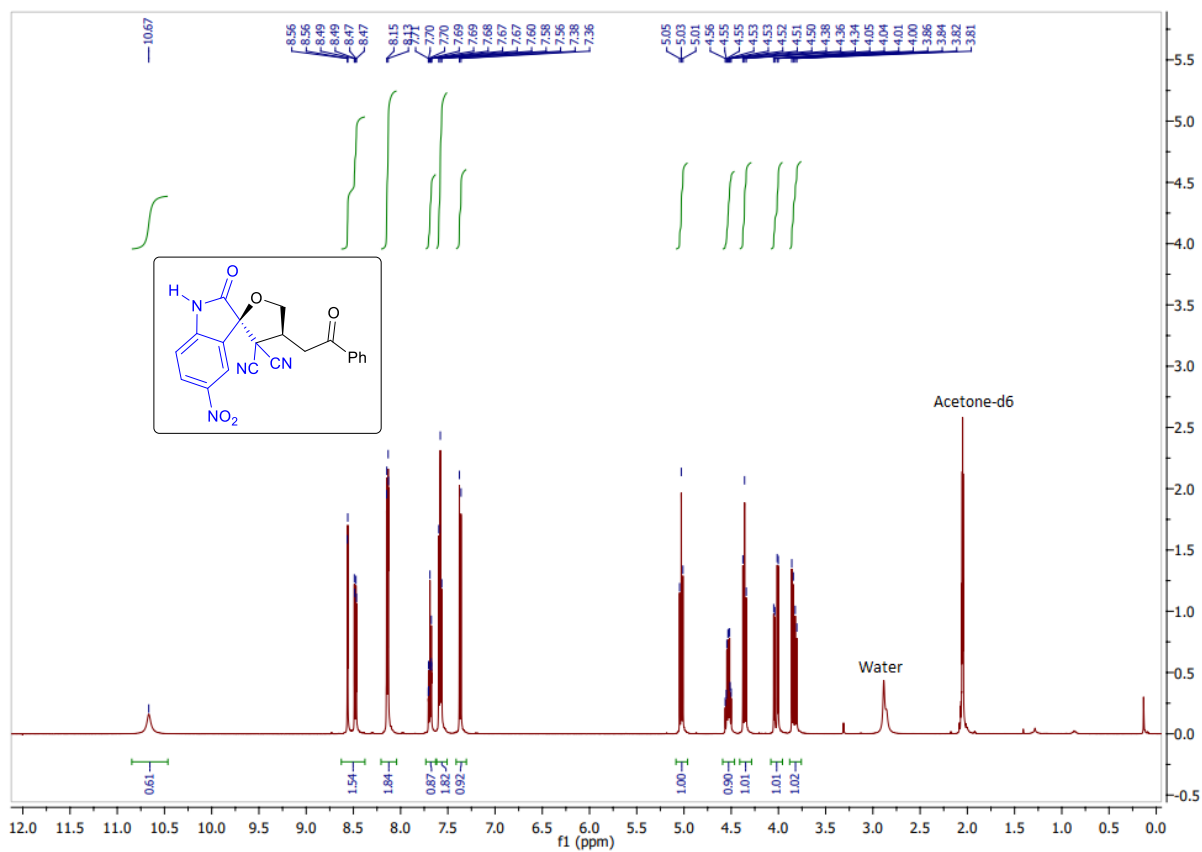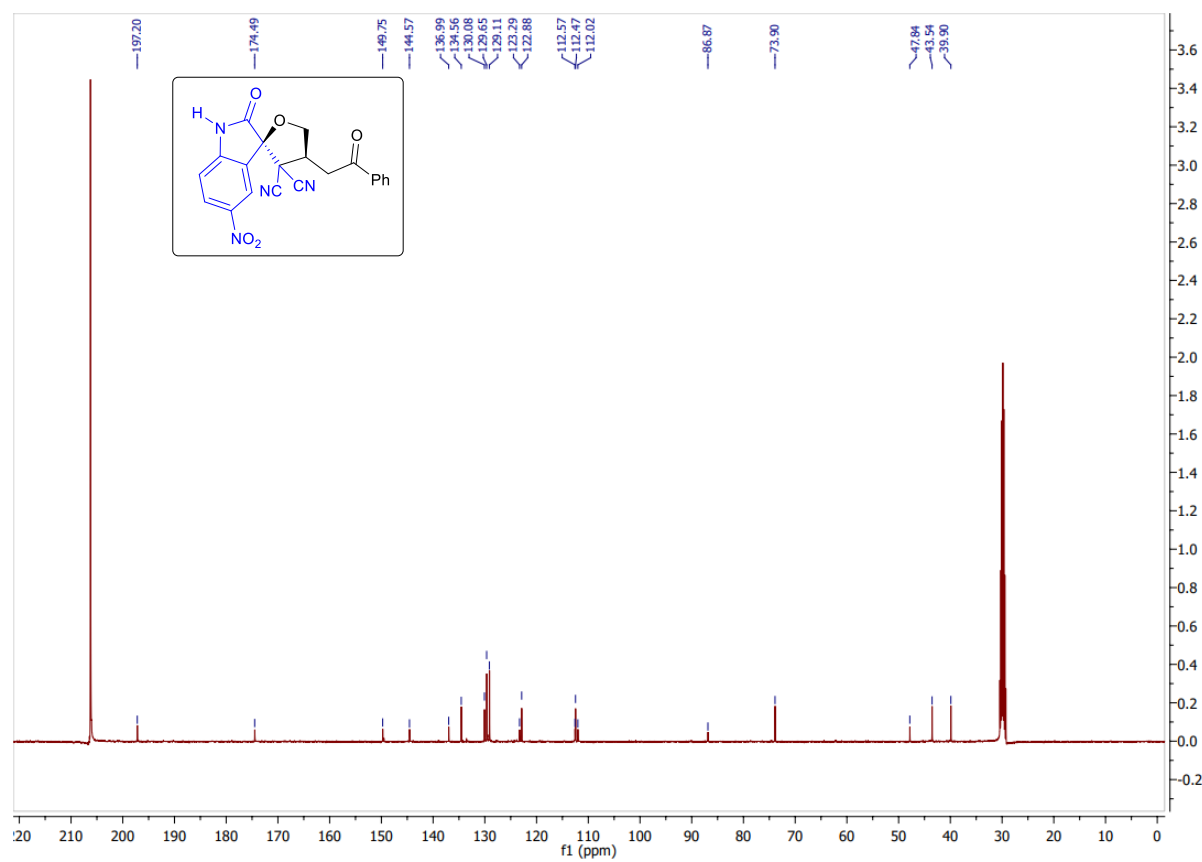

500 MHz  $^1\text{H}$  NMR and 400 MHz  $^{13}\text{C}$  NMR (Acetone- $d_6$ ) Spectra of 3ga

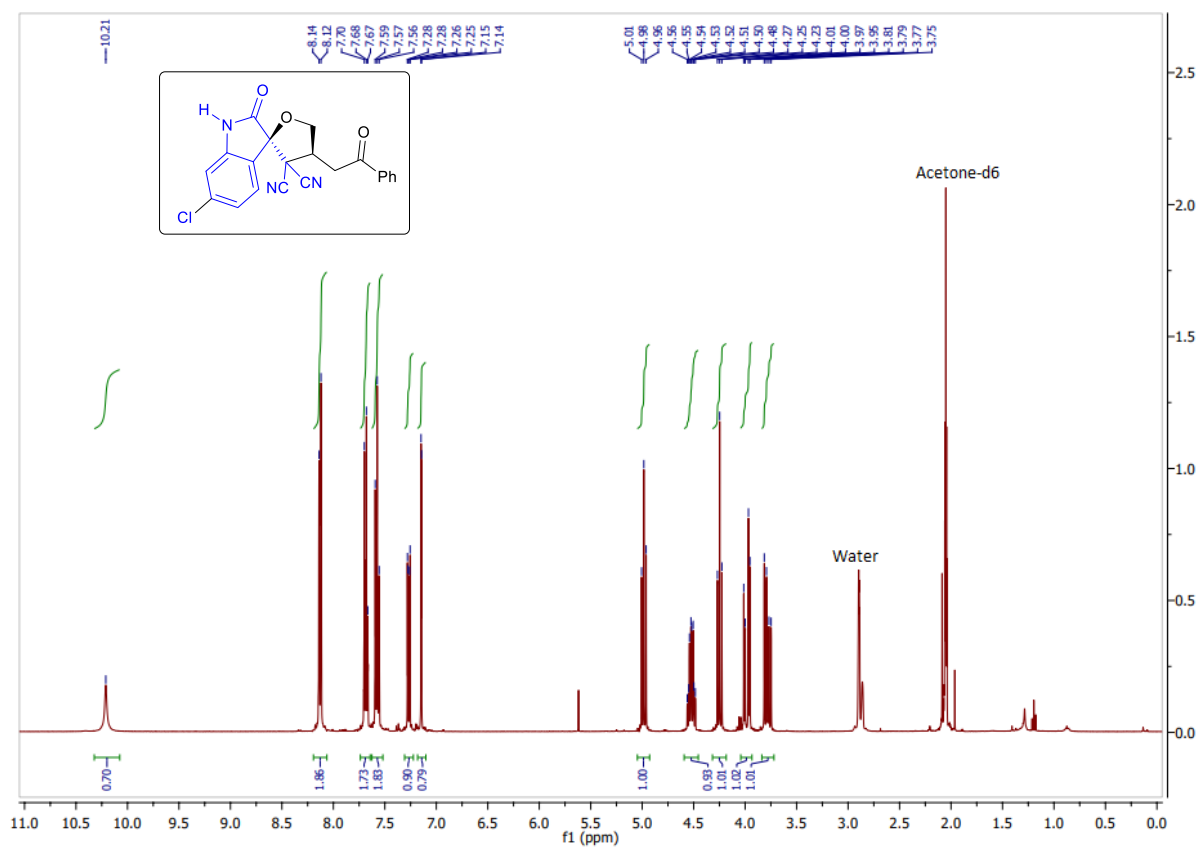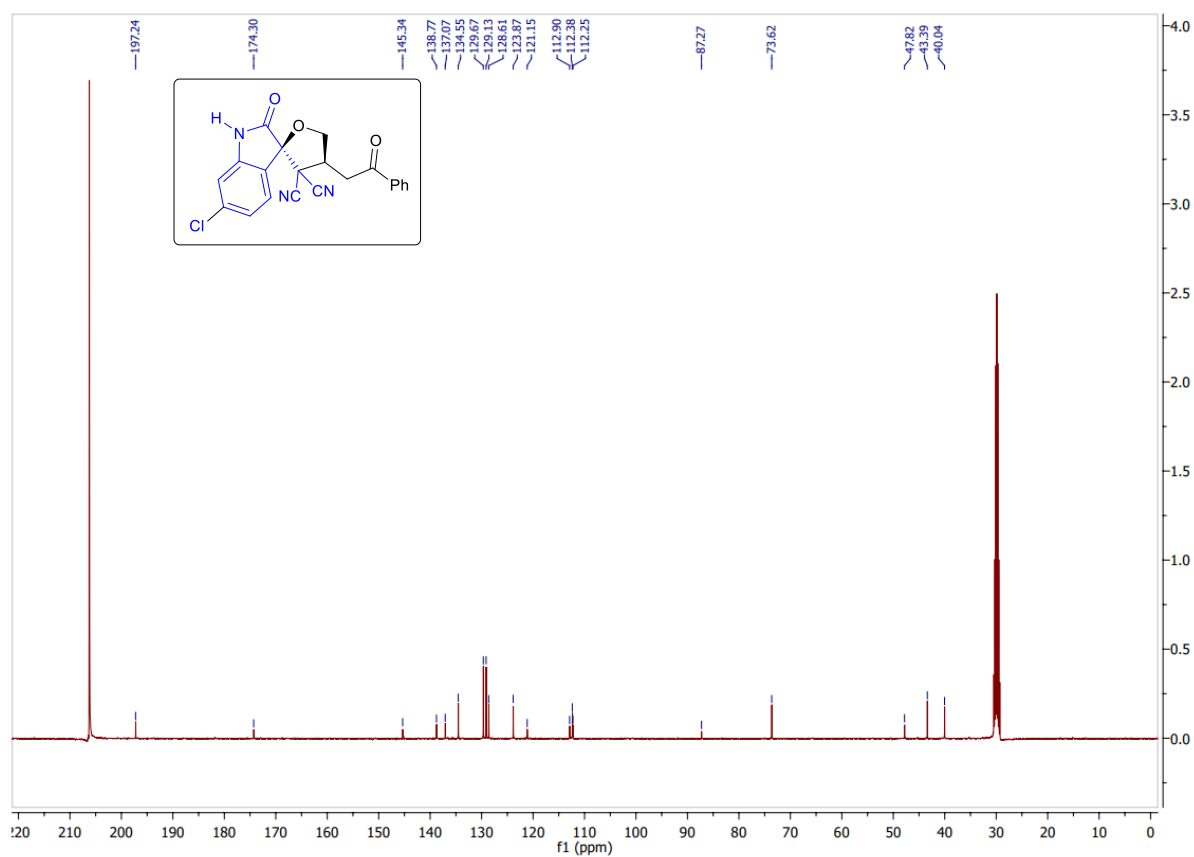

400 MHz <sup>1</sup>H NMR and 400 MHz <sup>13</sup>C NMR (Acetone-d<sub>6</sub>) Spectra of 3ha

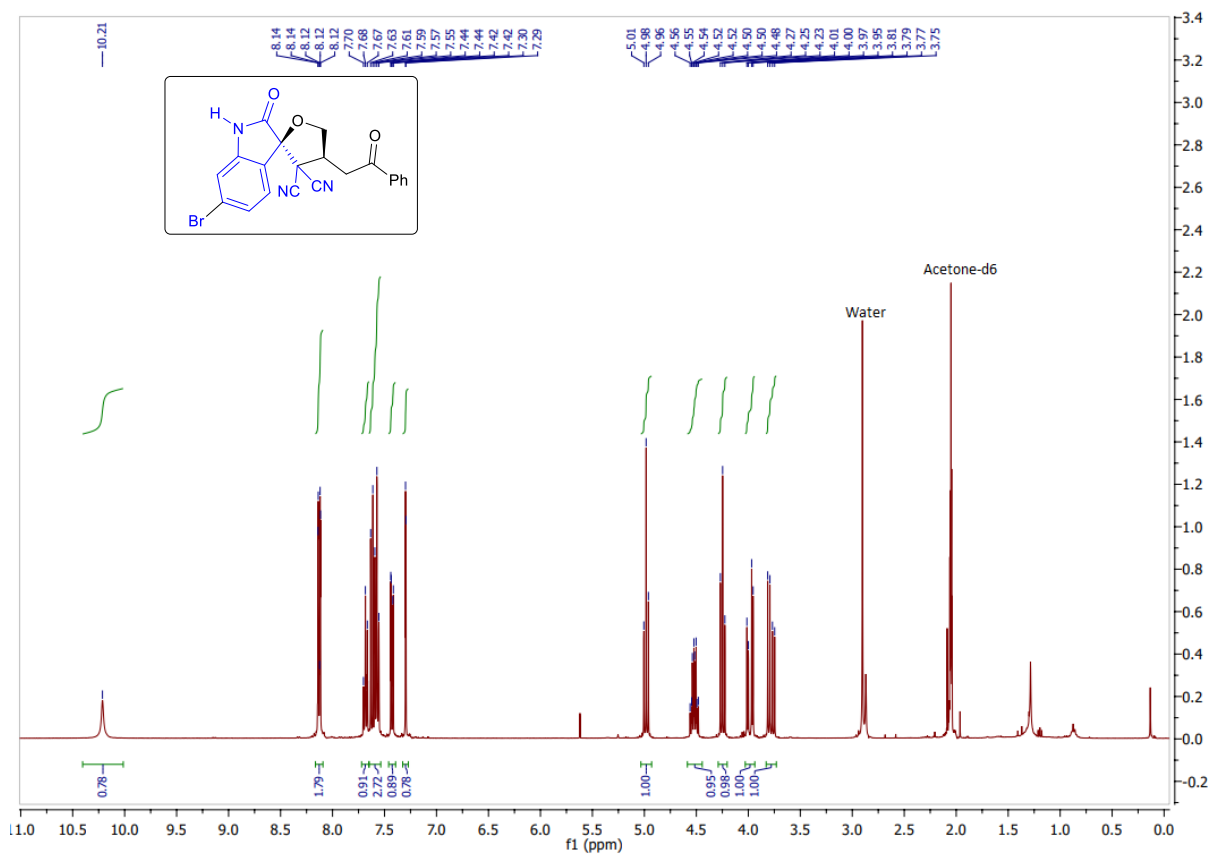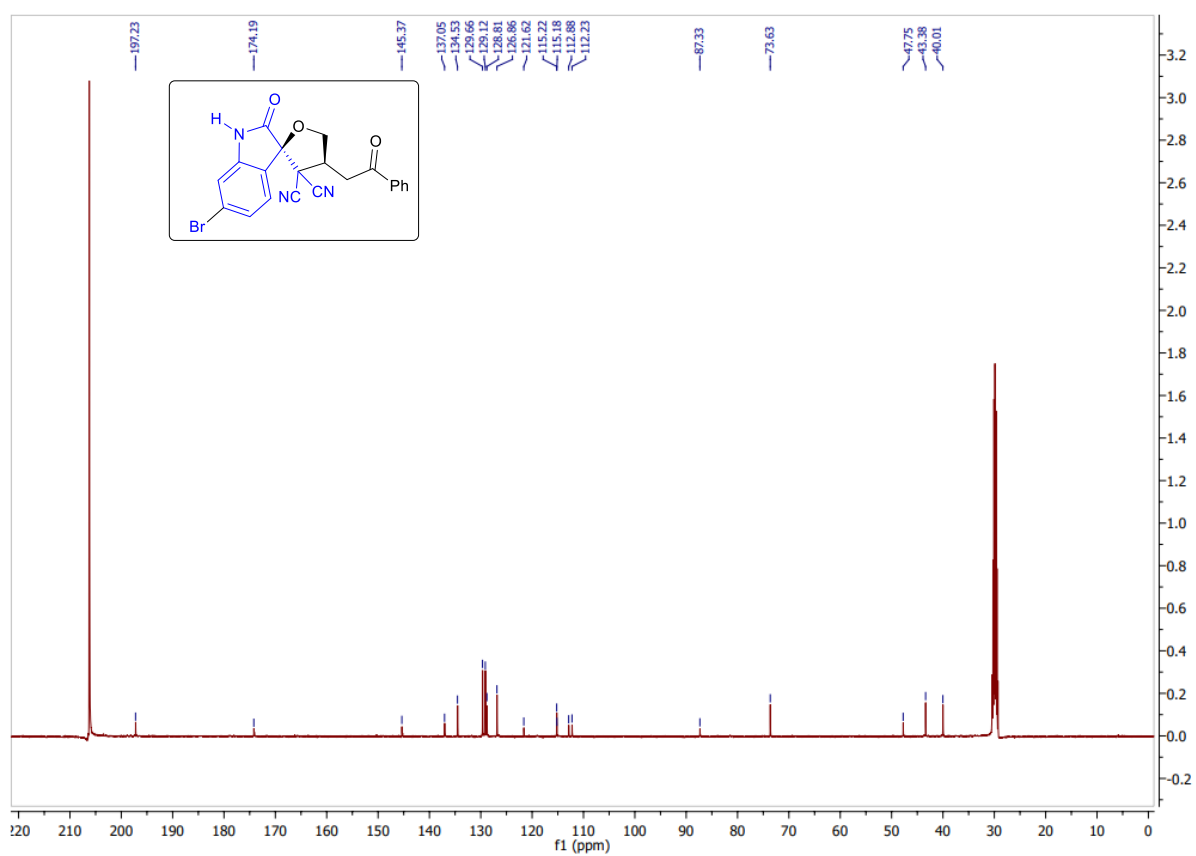

400 MHz <sup>1</sup>H NMR and 400 MHz <sup>13</sup>C NMR (Acetone-d<sub>6</sub>) Spectra of 3ia

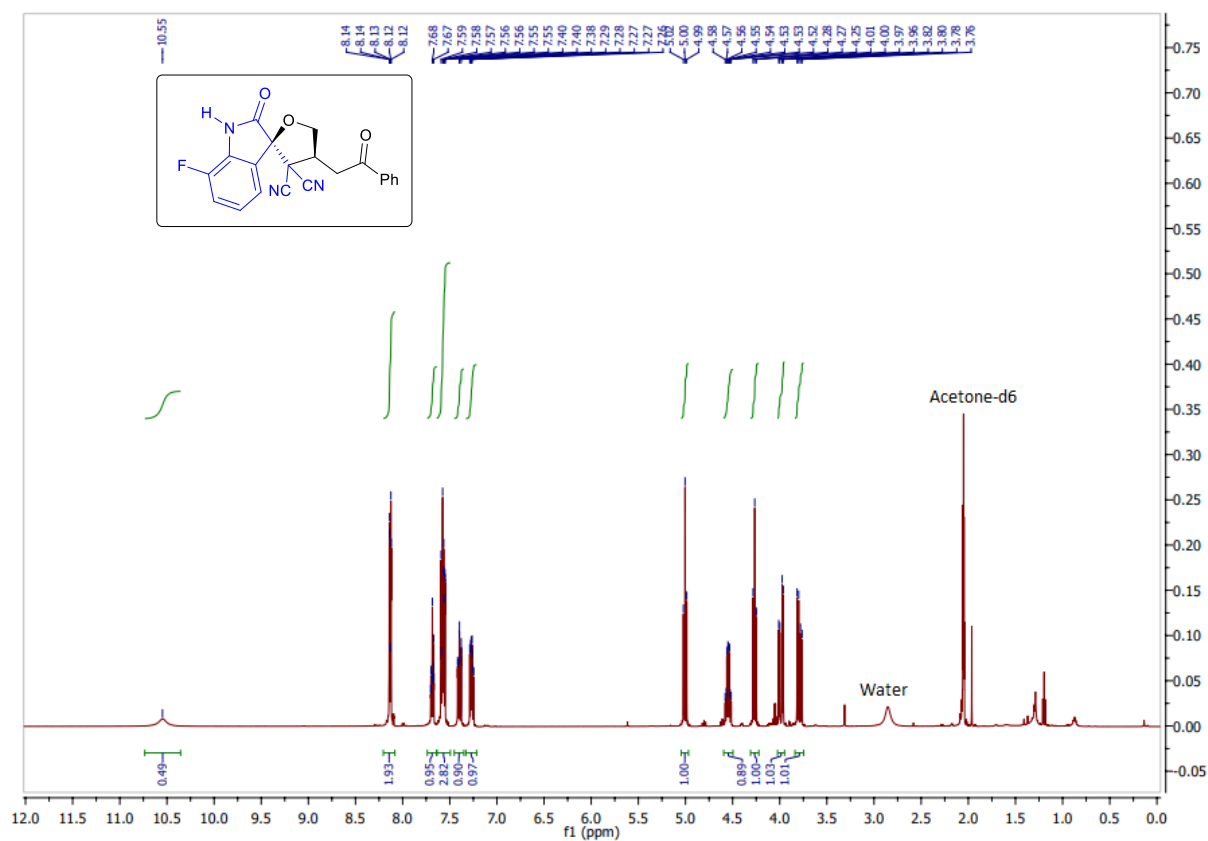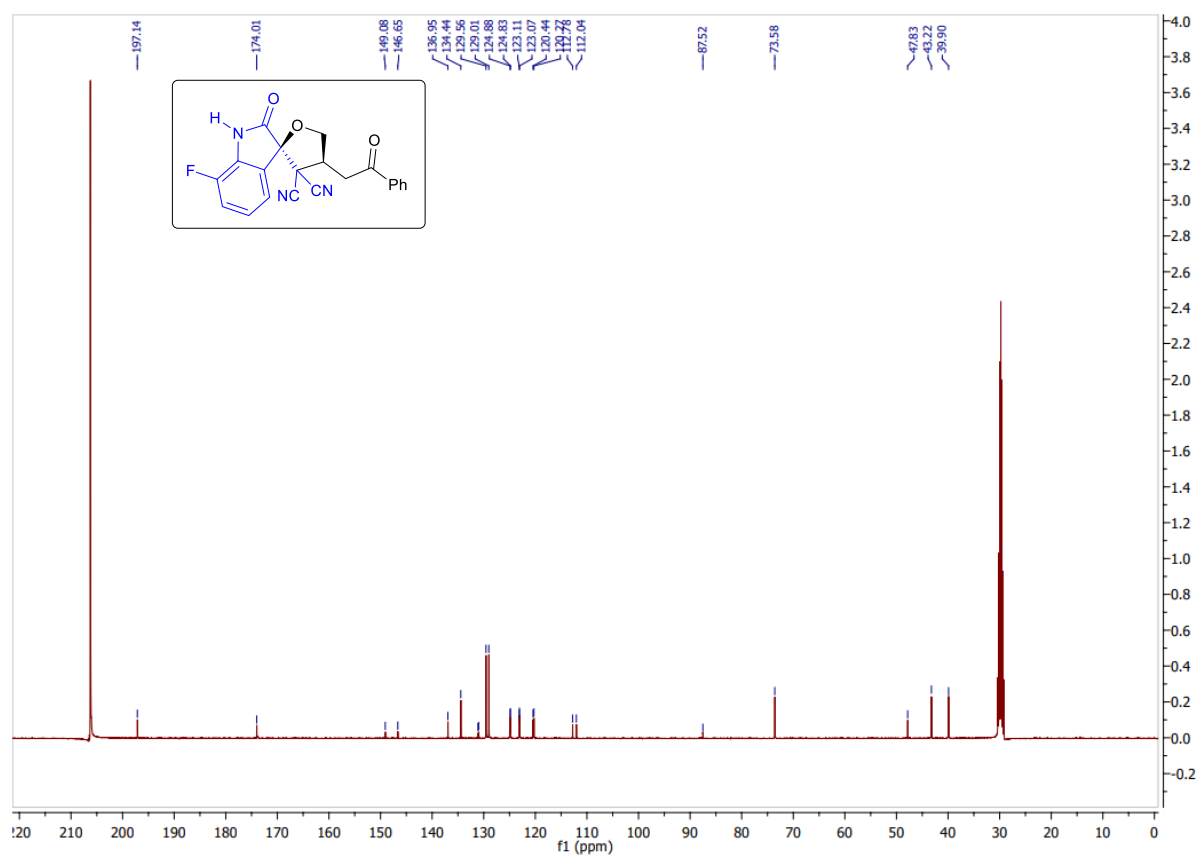

500 MHz  $^1\text{H}$  NMR and 400 MHz  $^{13}\text{C}$  NMR (Acetone- $d_6$ ) Spectra of 3ja

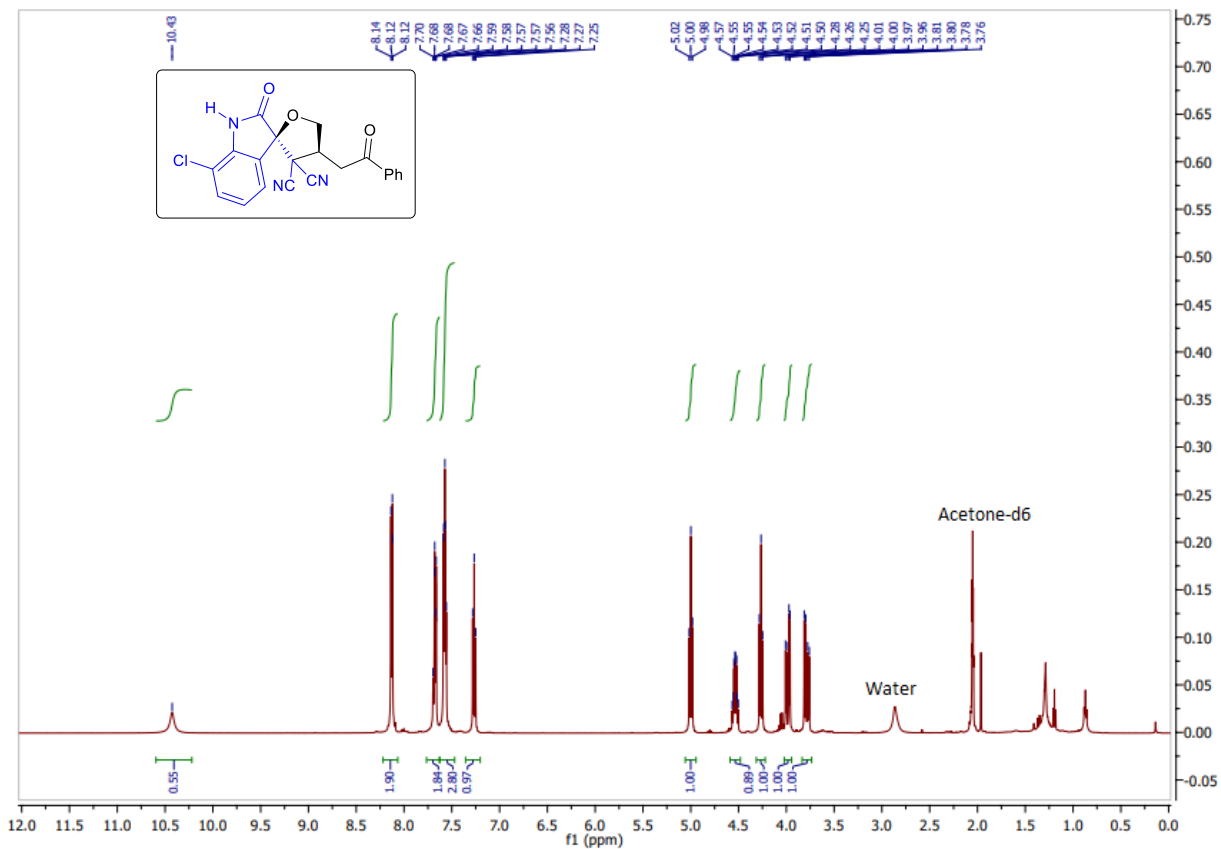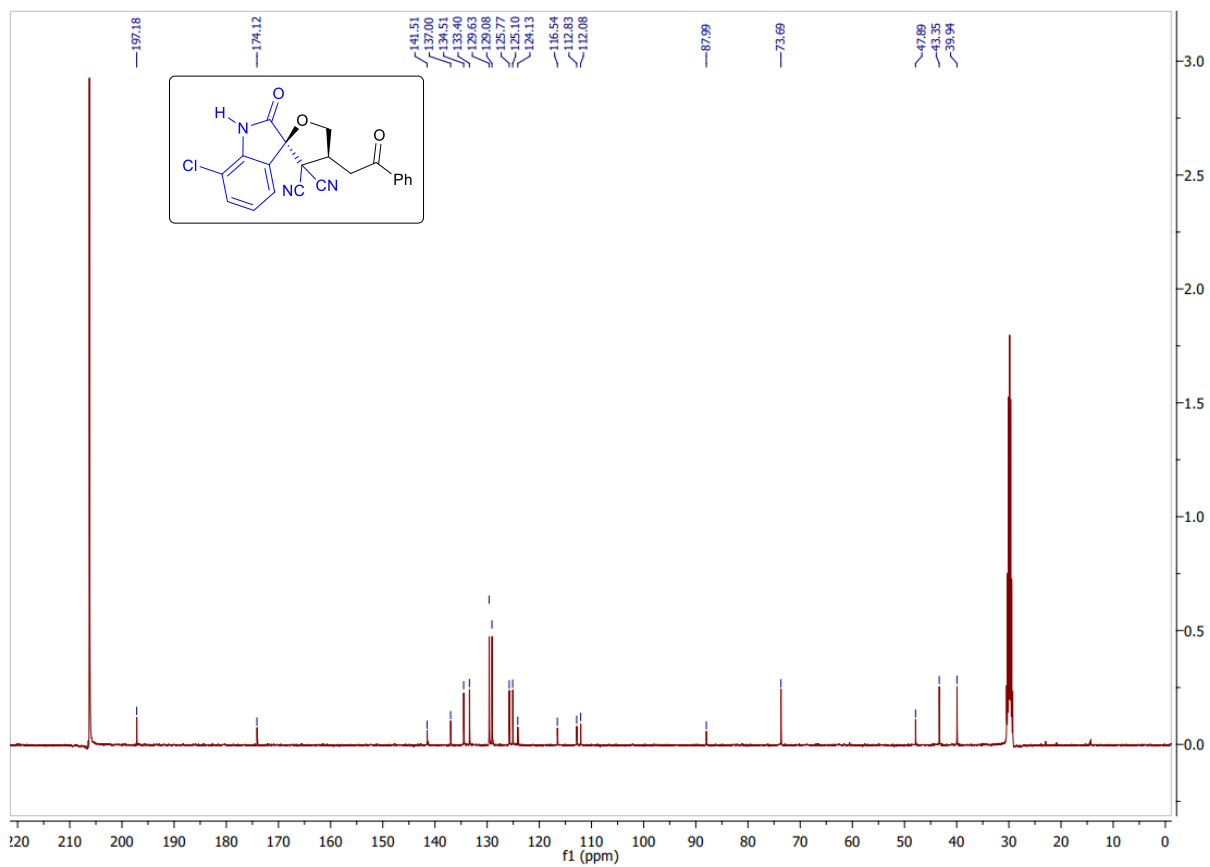

500 MHz <sup>1</sup>H NMR and 400 MHz <sup>13</sup>C NMR (Acetone-d<sub>6</sub>) Spectra of 3ka

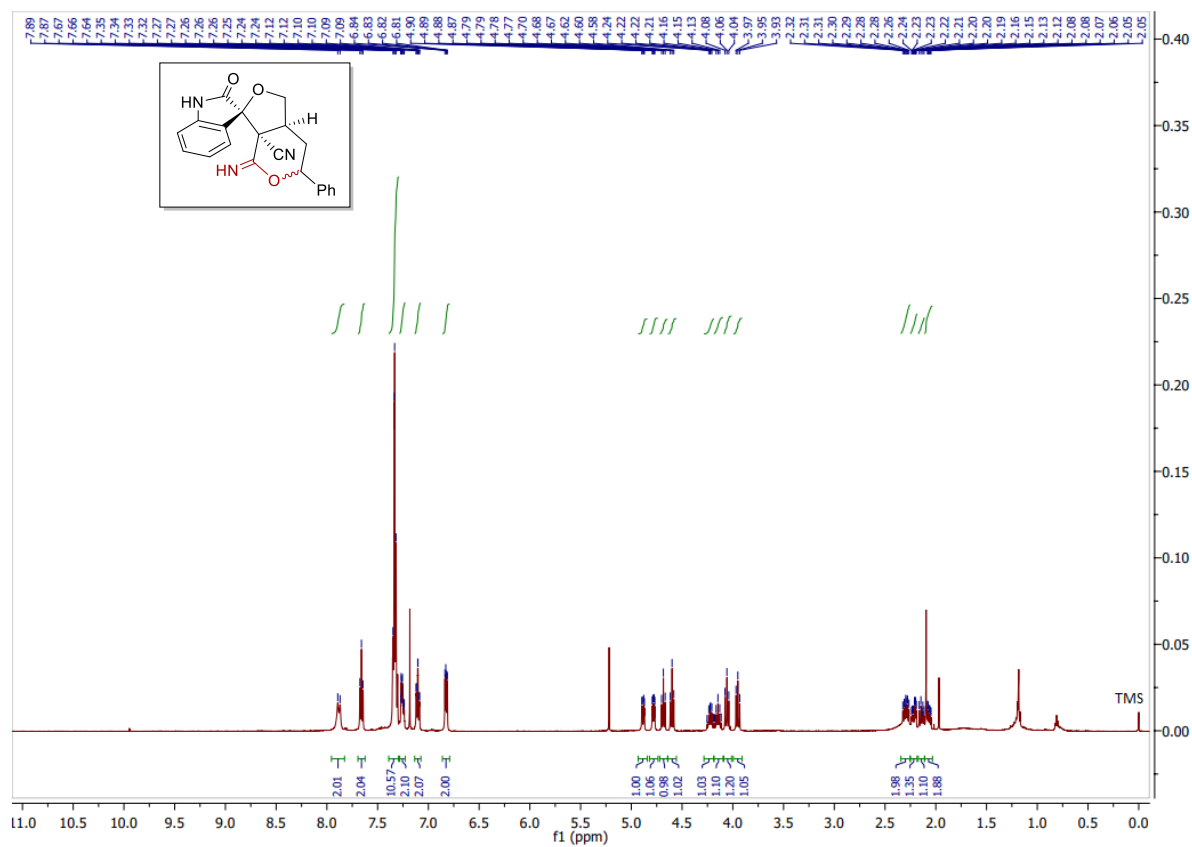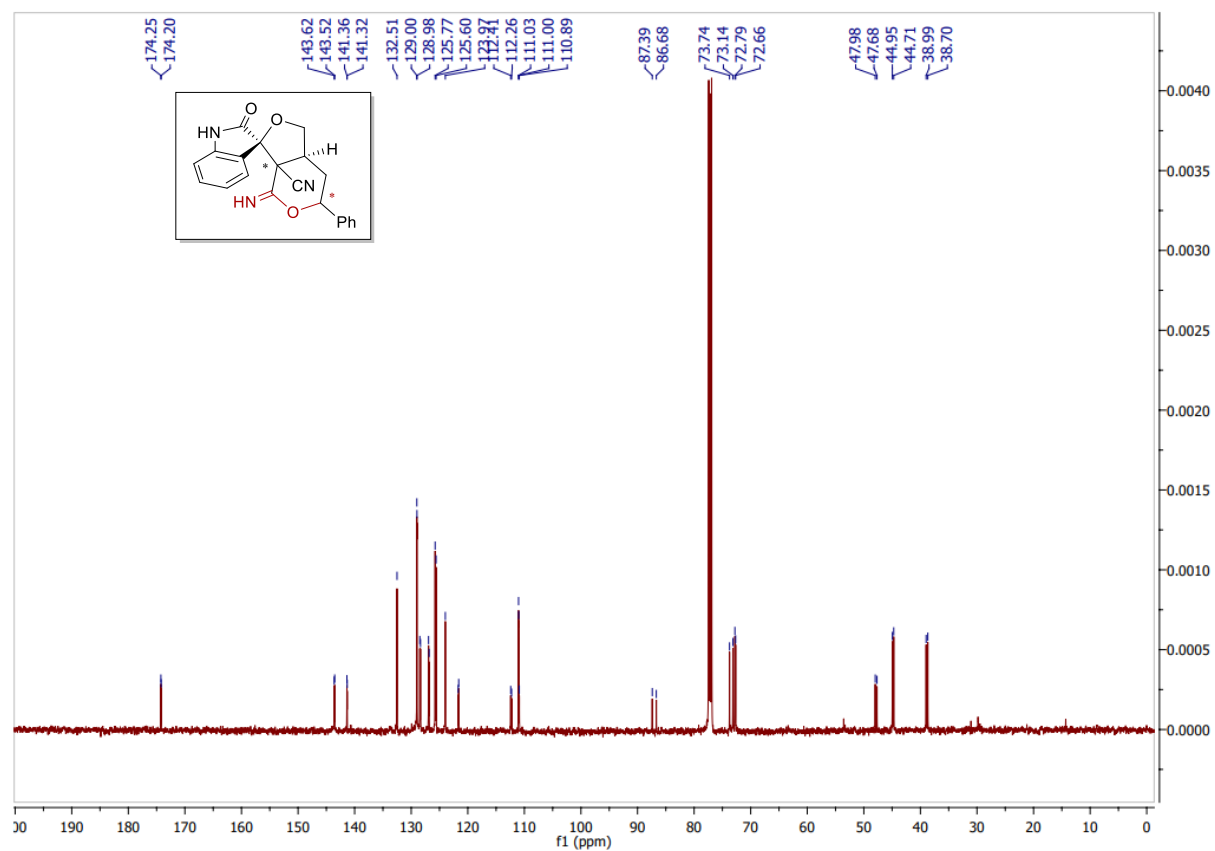

500 MHz <sup>1</sup>H NMR and 500 MHz <sup>13</sup>C NMR (CDCl<sub>3</sub>) Spectra of 4aa

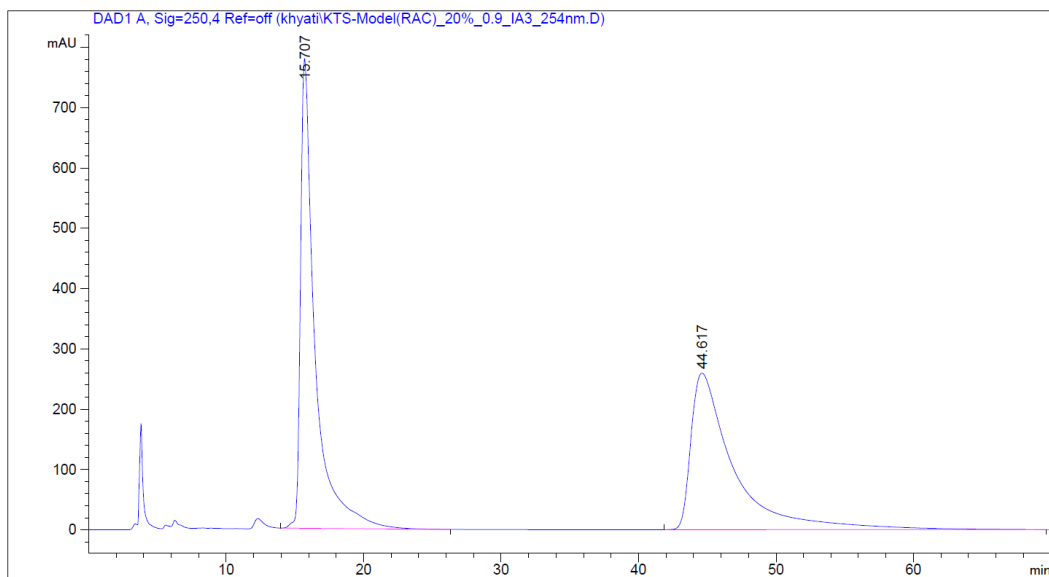

=====  
 Area Percent Report  
 =====

| Peak # | RetTime [min] | Type | Width [min] | Area [mAU*s] | Height [mAU] | Area %  |
|--------|---------------|------|-------------|--------------|--------------|---------|
| 1      | 15.707        | BB   | 1.0324      | 5.68932e4    | 778.68622    | 50.3059 |
| 2      | 44.617        | BB   | 3.0051      | 5.62014e4    | 259.45819    | 49.6941 |

=====  
 \*\*\* End of Report \*\*\*

### HPLC graph of racemic 3aa

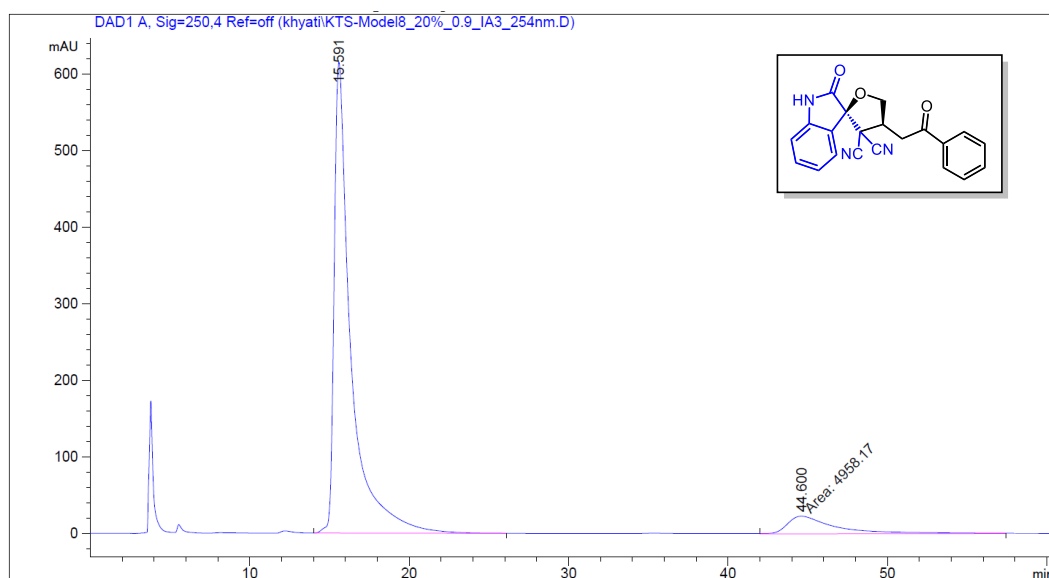

=====  
 Area Percent Report  
 =====

| Peak # | RetTime [min] | Type | Width [min] | Area [mAU*s] | Height [mAU] | Area %  |
|--------|---------------|------|-------------|--------------|--------------|---------|
| 1      | 15.591        | BB   | 1.0282      | 4.48167e4    | 614.97888    | 90.0388 |
| 2      | 44.600        | MM   | 3.5835      | 4958.16797   | 23.06004     | 9.9612  |

=====  
 \*\*\* End of Report \*\*\*

### HPLC graph of enantioenriched 3aa

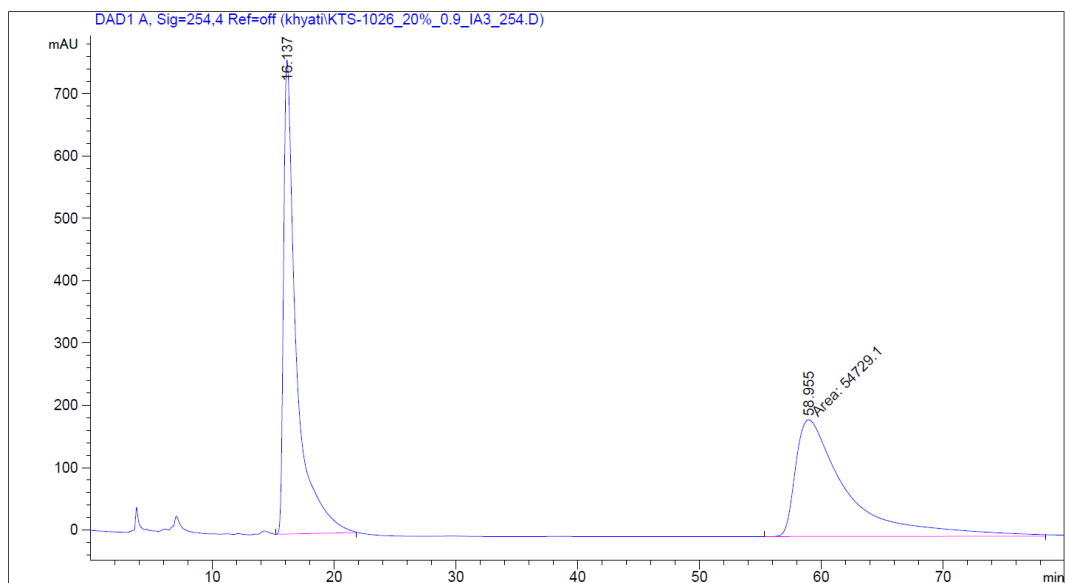

=====  
 Area Percent Report  
 =====

| Peak # | RetTime [min] | Type | Width [min] | Area [mAU*s] | Height [mAU] | Area %  |
|--------|---------------|------|-------------|--------------|--------------|---------|
| 1      | 16.137        | VB   | 1.0266      | 5.50822e4    | 760.88824    | 50.1607 |
| 2      | 58.955        | MM   | 4.8745      | 5.47291e4    | 187.12692    | 49.8393 |

=====  
 \*\*\* End of Report \*\*\*

HPLC graph of racemic **3ab**

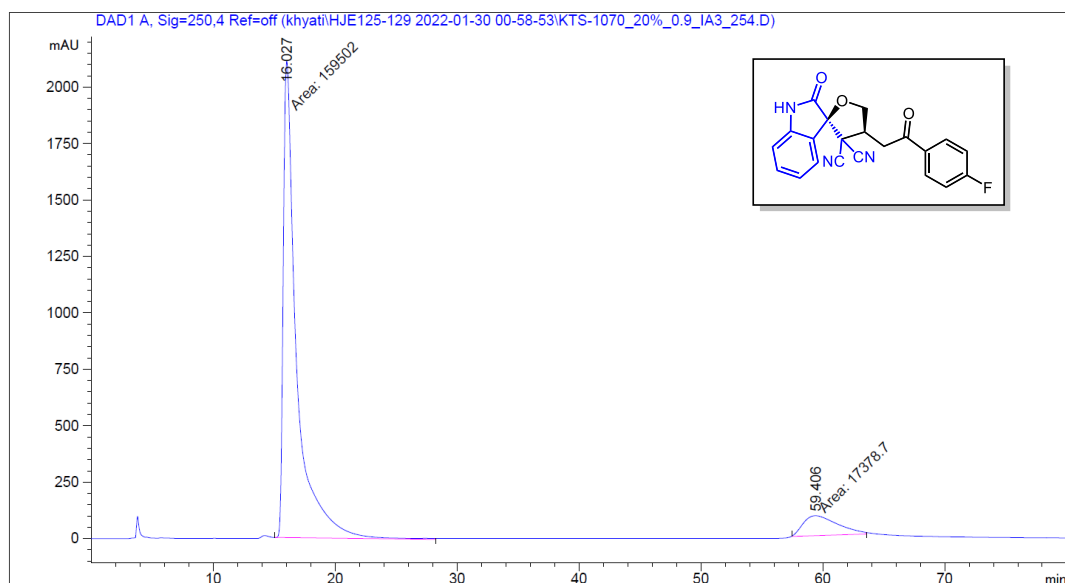

=====  
 Area Percent Report  
 =====

| Peak # | RetTime [min] | Type | Width [min] | Area [mAU*s] | Height [mAU] | Area %  |
|--------|---------------|------|-------------|--------------|--------------|---------|
| 1      | 16.027        | MM   | 1.2596      | 1.59502e5    | 2110.52344   | 90.1749 |
| 2      | 59.406        | MM   | 3.2807      | 1.73787e4    | 88.28668     | 9.8251  |

=====  
 \*\*\* End of Report \*\*\*

HPLC graph of enantioenriched **3ab**



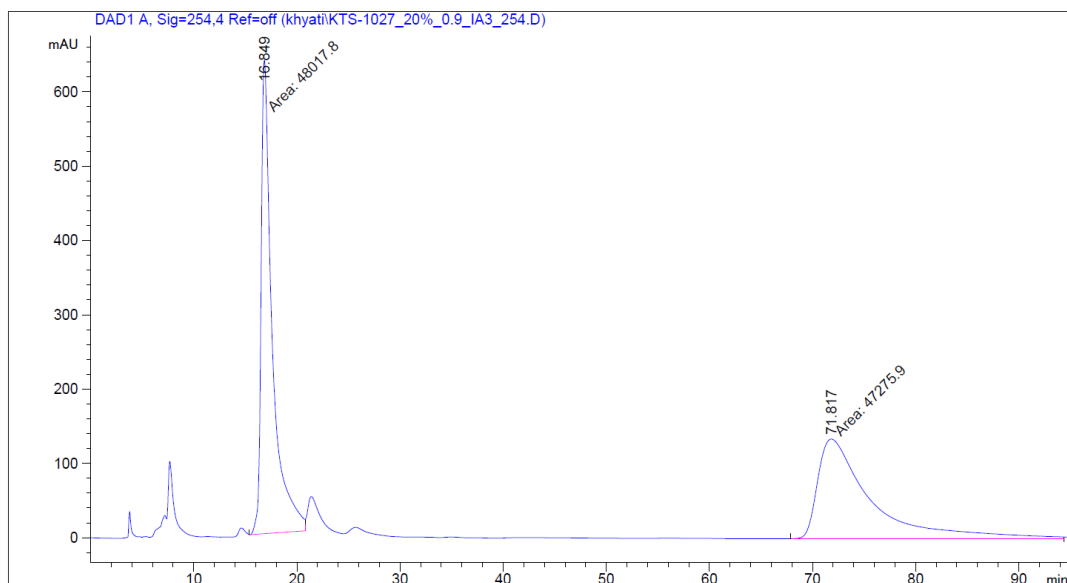

=====  
 Area Percent Report  
 =====

| Peak # | RetTime [min] | Type | Width [min] | Area [mAU*s] | Height [mAU] | Area %  |
|--------|---------------|------|-------------|--------------|--------------|---------|
| 1      | 16.849        | MM   | 1.2558      | 4.80178e4    | 637.29138    | 50.3892 |
| 2      | 71.817        | MM   | 5.8889      | 4.72759e4    | 133.79961    | 49.6108 |

=====  
 \*\*\* End of Report \*\*\*

HPLC graph of racemic **3ac**

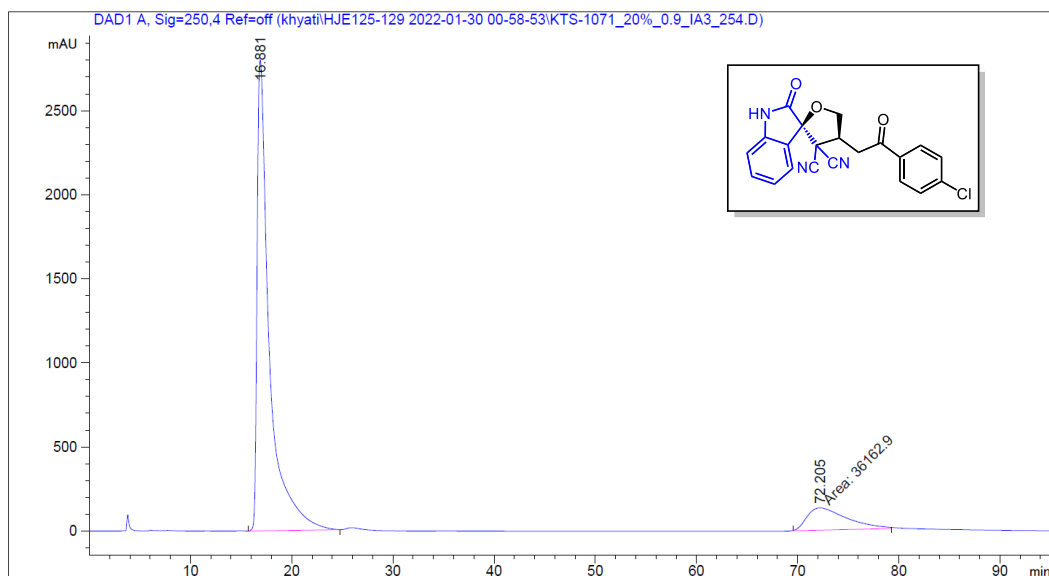

=====  
 Area Percent Report  
 =====

| Peak # | RetTime [min] | Type | Width [min] | Area [mAU*s] | Height [mAU] | Area %  |
|--------|---------------|------|-------------|--------------|--------------|---------|
| 1      | 16.881        | BB   | 1.1748      | 2.34598e5    | 2801.99390   | 86.6440 |
| 2      | 72.205        | MM   | 4.5398      | 3.61629e4    | 132.76340    | 13.3560 |

=====  
 \*\*\* End of Report \*\*\*

HPLC graph of enantioenriched **3ac**

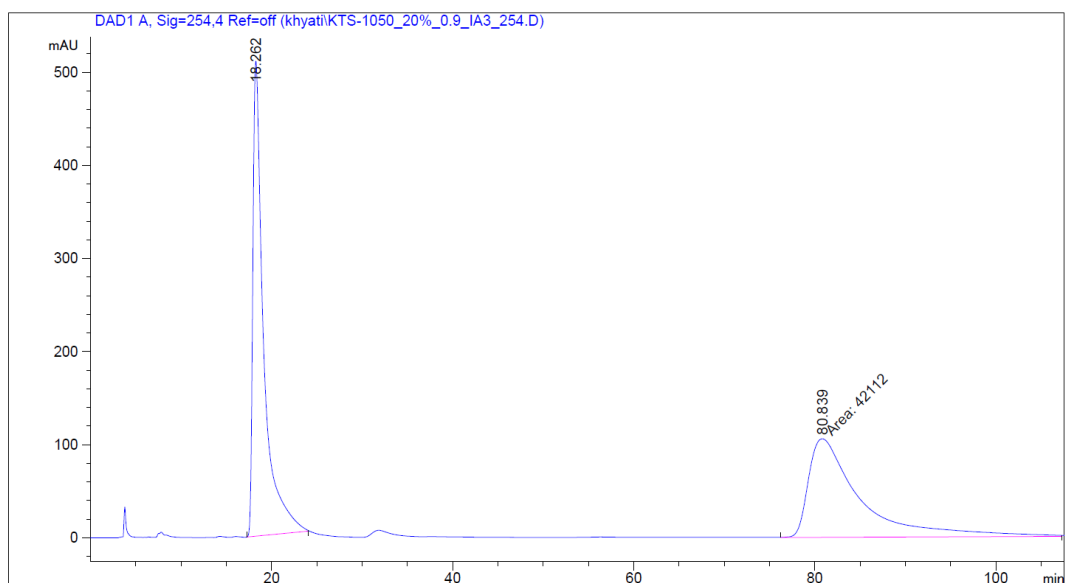

=====  
 Area Percent Report  
 =====

| Peak # | RetTime [min] | Type | Width [min] | Area [mAU*s] | Height [mAU] | Area %  |
|--------|---------------|------|-------------|--------------|--------------|---------|
| 1      | 18.262        | BB   | 1.1828      | 4.23641e4    | 510.15558    | 50.1492 |
| 2      | 80.839        | MM   | 6.6263      | 4.21120e4    | 105.92084    | 49.8508 |

=====  
 \*\*\* End of Report \*\*\*

HPLC graph of racemic **3ad**

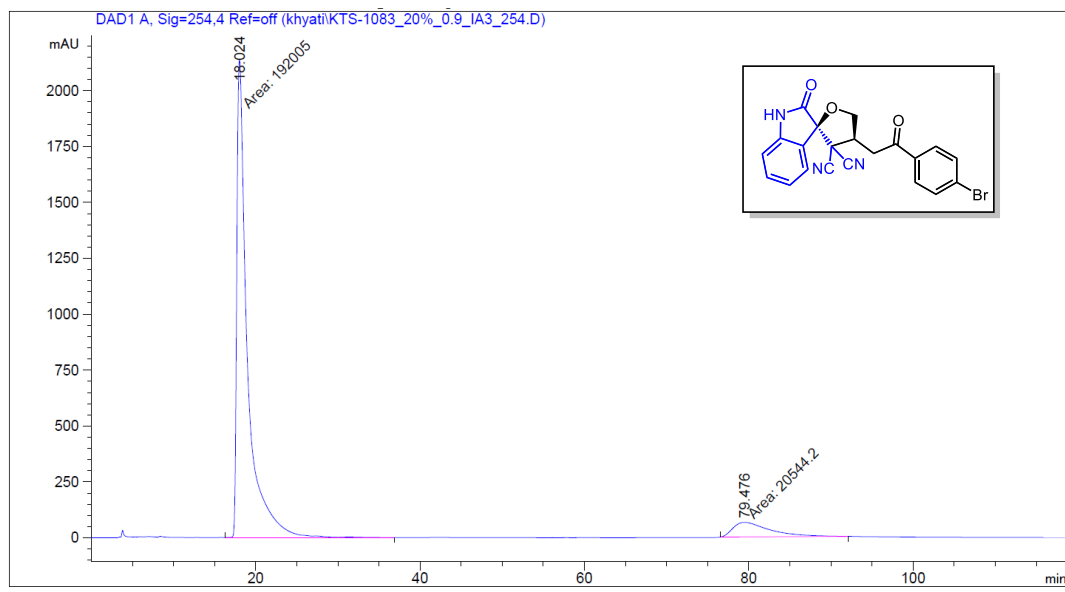

=====  
 Area Percent Report  
 =====

| Peak # | RetTime [min] | Type | Width [min] | Area [mAU*s] | Height [mAU] | Area %  |
|--------|---------------|------|-------------|--------------|--------------|---------|
| 1      | 18.024        | MM   | 1.4973      | 1.92005e5    | 2137.30103   | 90.3344 |
| 2      | 79.476        | MM   | 5.2373      | 2.05442e4    | 65.37817     | 9.6656  |

=====  
 \*\*\* End of Report \*\*\*

HPLC graph of enantioenriched **3ad**

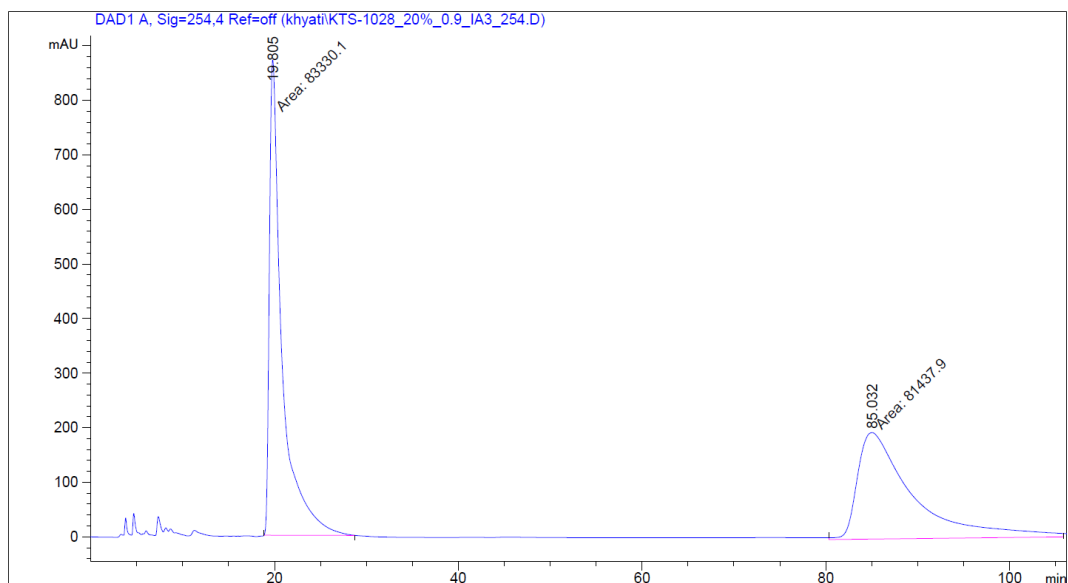

=====  
 Area Percent Report  
 =====

| Peak # | RetTime [min] | Type | Width [min] | Area [mAU*s] | Height [mAU] | Area %  |
|--------|---------------|------|-------------|--------------|--------------|---------|
| 1      | 19.805        | MM   | 1.5947      | 8.33301e4    | 870.88110    | 50.5742 |
| 2      | 85.032        | MM   | 6.9586      | 8.14379e4    | 195.05414    | 49.4258 |

=====  
 \*\*\* End of Report \*\*\*

HPLC graph of racemic **3ae**

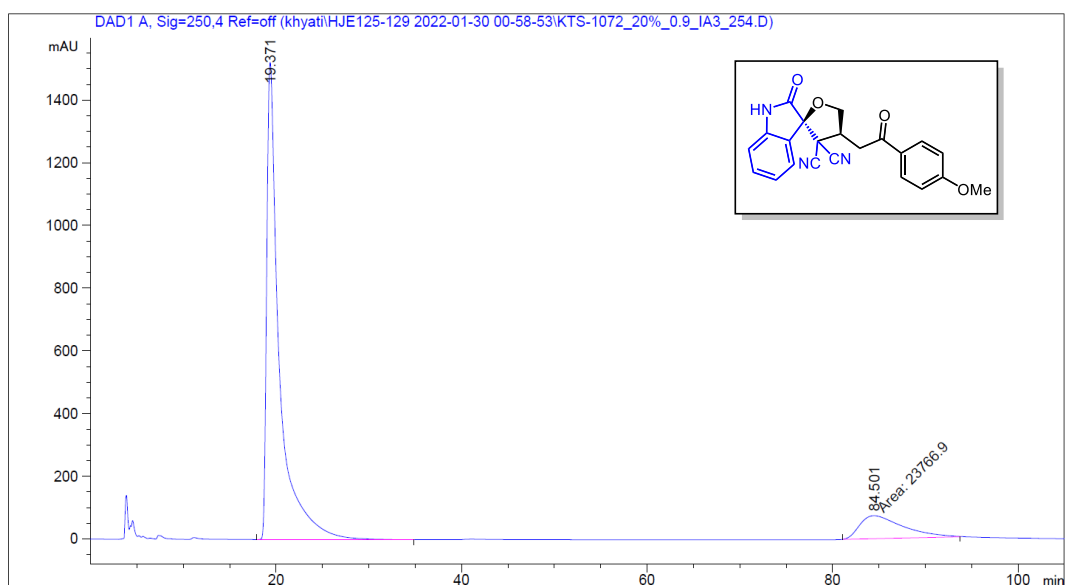

=====  
 Area Percent Report  
 =====

| Peak # | RetTime [min] | Type | Width [min] | Area [mAU*s] | Height [mAU] | Area %  |
|--------|---------------|------|-------------|--------------|--------------|---------|
| 1      | 19.371        | BB   | 1.3309      | 1.43620e5    | 1521.95081   | 85.8012 |
| 2      | 84.501        | MM   | 5.4029      | 2.37669e4    | 73.31554     | 14.1988 |

=====  
 \*\*\* End of Report \*\*\*

HPLC graph of enantioenriched **3ae**

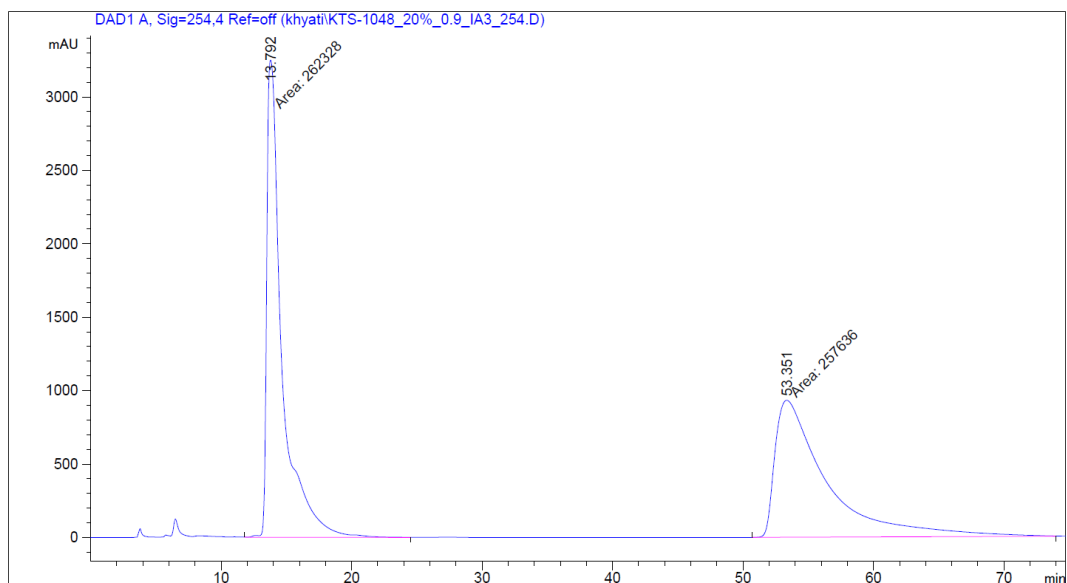

=====  
 Area Percent Report  
 =====

| Peak # | RetTime [min] | Type | Width [min] | Area [mAU*s] | Height [mAU] | Area %  |
|--------|---------------|------|-------------|--------------|--------------|---------|
| 1      | 13.792        | MM   | 1.3450      | 2.62328e5    | 3250.70288   | 50.4512 |
| 2      | 53.351        | MM   | 4.6015      | 2.57636e5    | 933.15717    | 49.5488 |

=====  
 \*\*\* End of Report \*\*\*

### HPLC graph of racemic **3af**

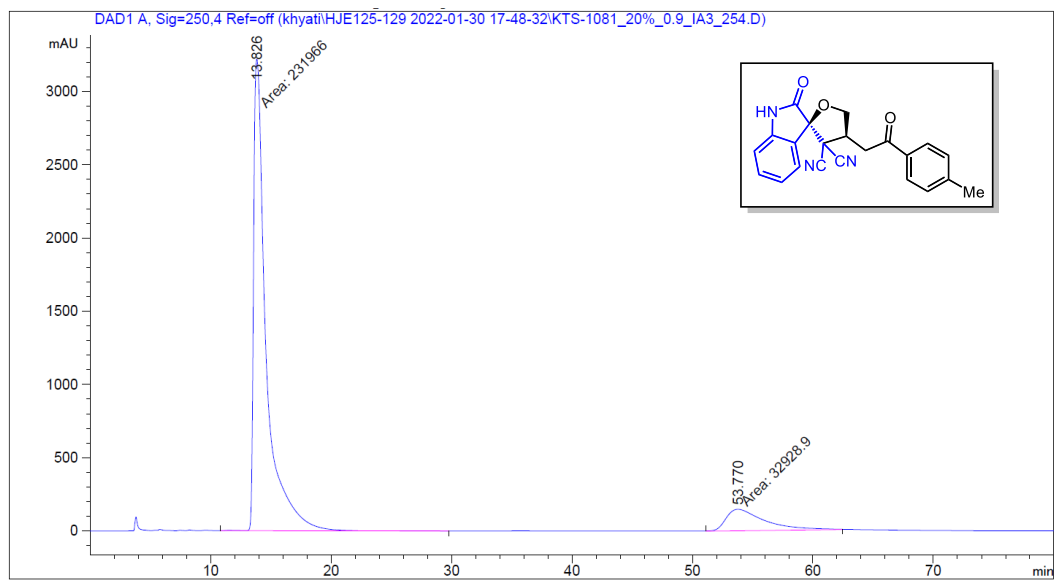

=====  
 Area Percent Report  
 =====

| Peak # | RetTime [min] | Type | Width [min] | Area [mAU*s] | Height [mAU] | Area %  |
|--------|---------------|------|-------------|--------------|--------------|---------|
| 1      | 13.826        | MM   | 1.2013      | 2.31966e5    | 3218.25610   | 87.5691 |
| 2      | 53.770        | MM   | 3.7337      | 3.29239e4    | 146.98755    | 12.4309 |

=====  
 \*\*\* End of Report \*\*\*

### HPLC graph of enantioenriched **3af**

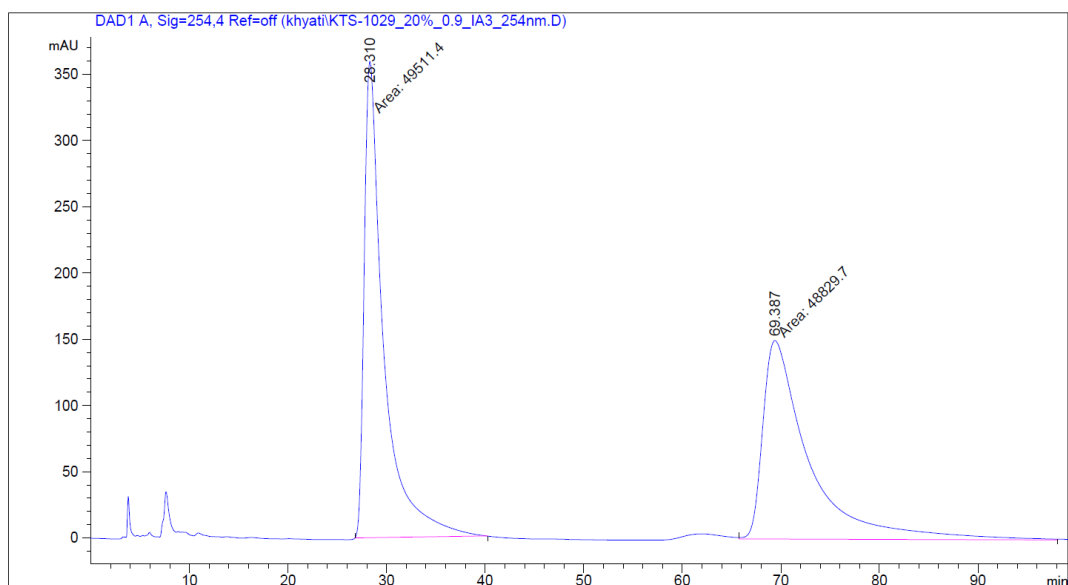

=====  
 Area Percent Report  
 =====

| Peak # | RetTime [min] | Type | Width [min] | Area [mAU*s] | Height [mAU] | Area %  |
|--------|---------------|------|-------------|--------------|--------------|---------|
| 1      | 28.310        | MM   | 2.2951      | 4.95114e4    | 359.54770    | 50.3466 |
| 2      | 69.387        | MM   | 5.4306      | 4.88297e4    | 149.85948    | 49.6534 |

=====  
 \*\*\* End of Report \*\*\*

HPLC graph of racemic **3ag**

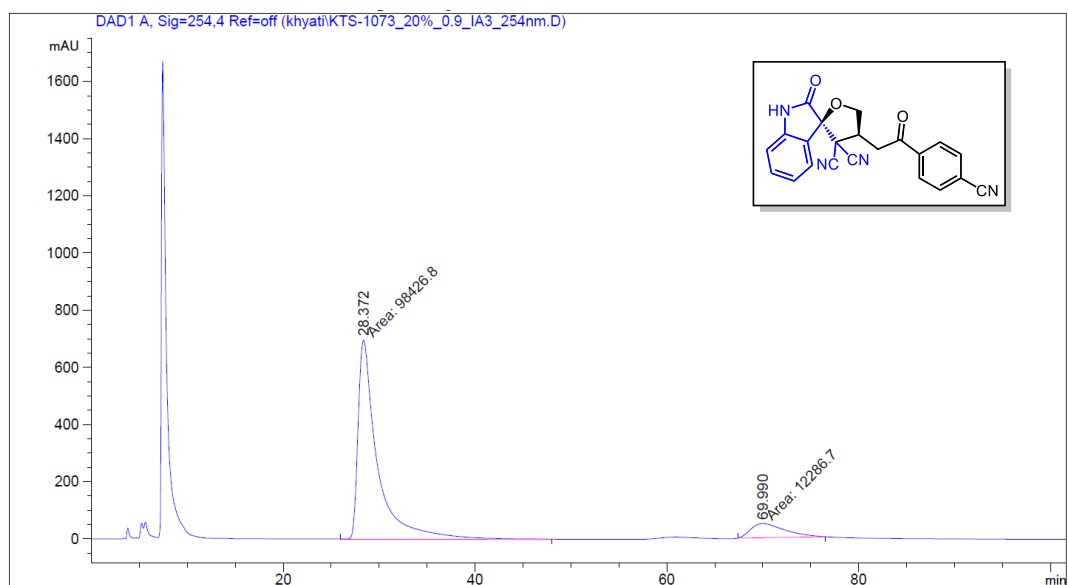

=====  
 Area Percent Report  
 =====

| Peak # | RetTime [min] | Type | Width [min] | Area [mAU*s] | Height [mAU] | Area %  |
|--------|---------------|------|-------------|--------------|--------------|---------|
| 1      | 28.372        | MM   | 2.3559      | 9.84267e4    | 696.30963    | 88.9023 |
| 2      | 69.990        | MM   | 4.1167      | 1.22867e4    | 49.74283     | 11.0977 |

=====  
 \*\*\* End of Report \*\*\*

HPLC graph of enantioenriched **3ag**

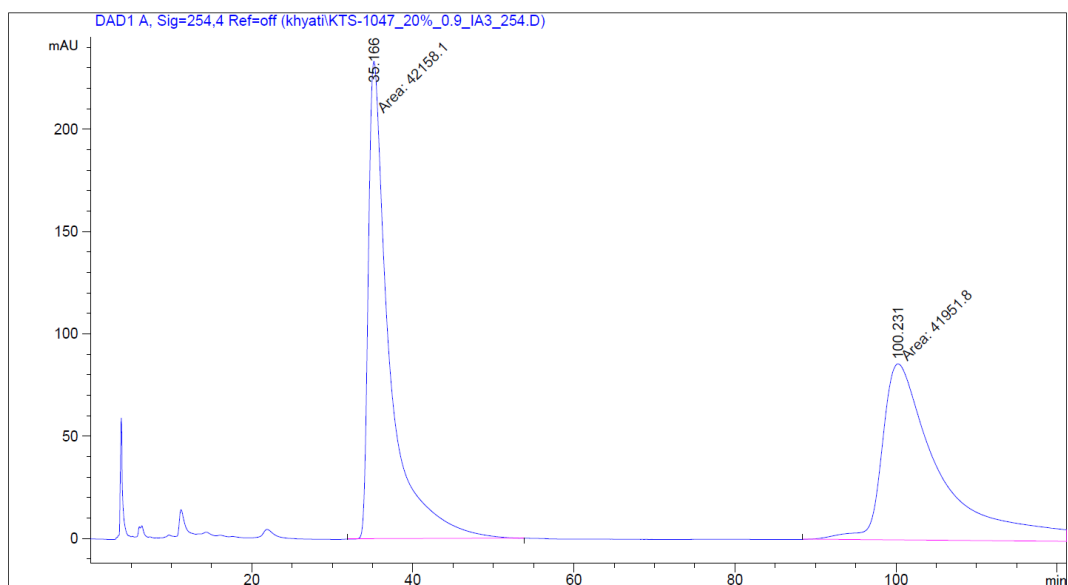

=====  
 Area Percent Report  
 =====

| Peak # | RetTime [min] | Type | Width [min] | Area [mAU*s] | Height [mAU] | Area %  |
|--------|---------------|------|-------------|--------------|--------------|---------|
| 1      | 35.166        | MM   | 3.0129      | 4.21581e4    | 233.20970    | 50.1226 |
| 2      | 100.231       | MM   | 8.1280      | 4.19518e4    | 86.02268     | 49.8774 |

=====  
 \*\*\* End of Report \*\*\*

### HPLC graph of racemic 3ah

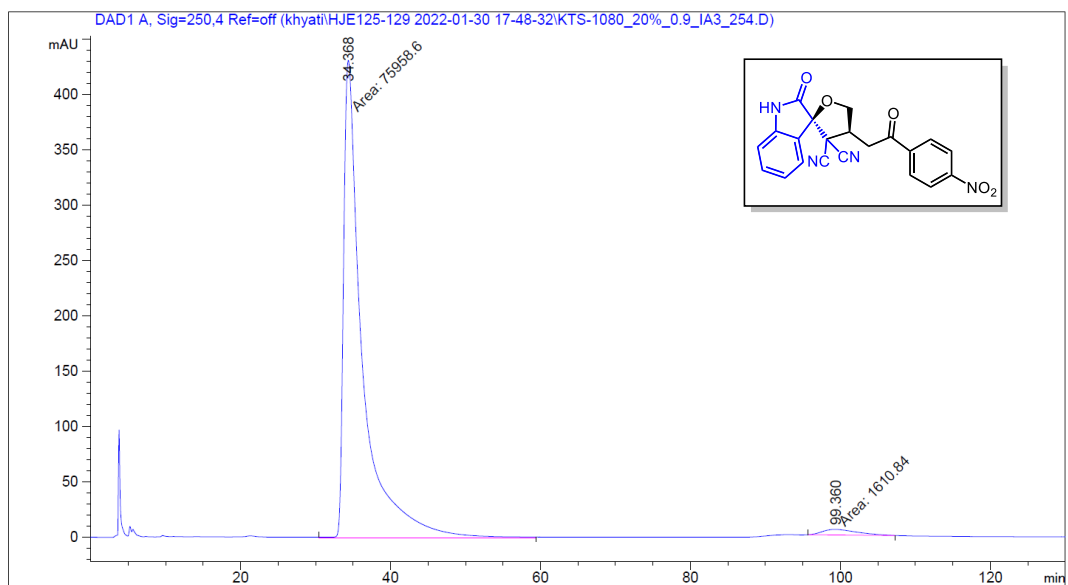

=====  
 Area Percent Report  
 =====

| Peak # | RetTime [min] | Type | Width [min] | Area [mAU*s] | Height [mAU] | Area %  |
|--------|---------------|------|-------------|--------------|--------------|---------|
| 1      | 34.368        | MM   | 2.9338      | 7.59586e4    | 431.51273    | 97.9234 |
| 2      | 99.360        | MM   | 5.3447      | 1610.84436   | 5.02320      | 2.0766  |

=====  
 \*\*\* End of Report \*\*\*

### HPLC graph of enantioenriched 3ah

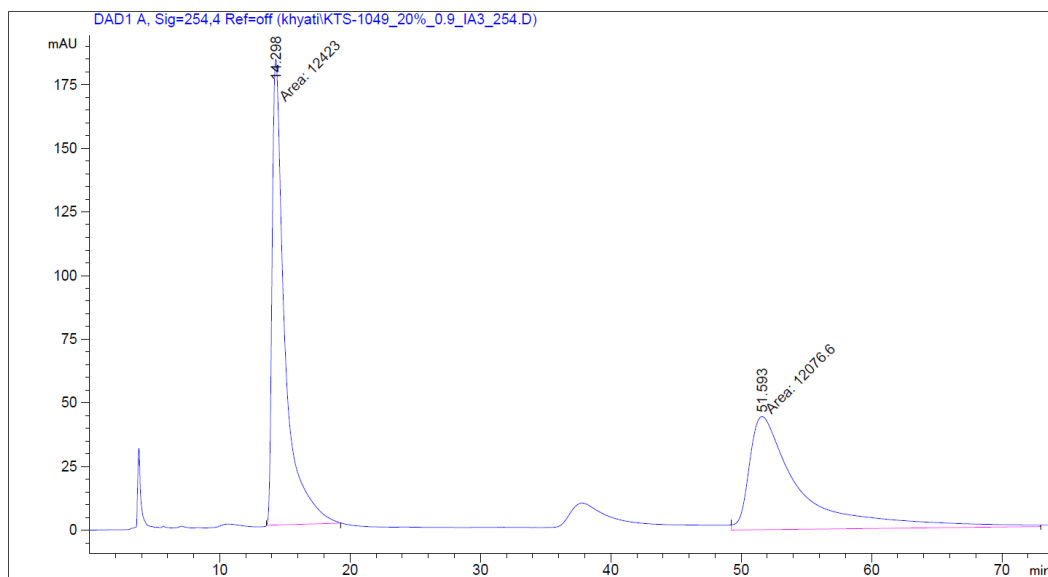

=====  
 Area Percent Report  
 =====

| Peak # | RetTime [min] | Type | Width [min] | Area [mAU*s] | Height [mAU] | Area %  |
|--------|---------------|------|-------------|--------------|--------------|---------|
| 1      | 14.298        | MM   | 1.1319      | 1.24230e4    | 182.91446    | 50.7070 |
| 2      | 51.593        | MM   | 4.5276      | 1.20766e4    | 44.45565     | 49.2930 |

=====  
 \*\*\* End of Report \*\*\*

### HPLC graph of racemic 3ai

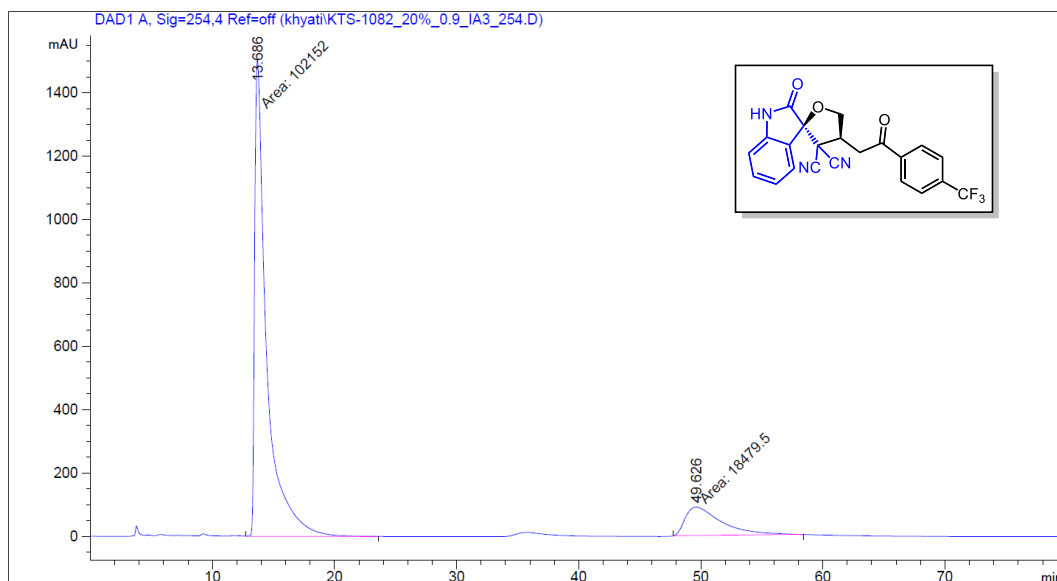

=====  
 Area Percent Report  
 =====

| Peak # | RetTime [min] | Type | Width [min] | Area [mAU*s] | Height [mAU] | Area %  |
|--------|---------------|------|-------------|--------------|--------------|---------|
| 1      | 13.686        | MM   | 1.1319      | 1.02152e5    | 1504.17163   | 84.6811 |
| 2      | 49.626        | MM   | 3.4317      | 1.84795e4    | 89.74892     | 15.3189 |

=====  
 \*\*\* End of Report \*\*\*

### HPLC graph of enantioenriched 3ai

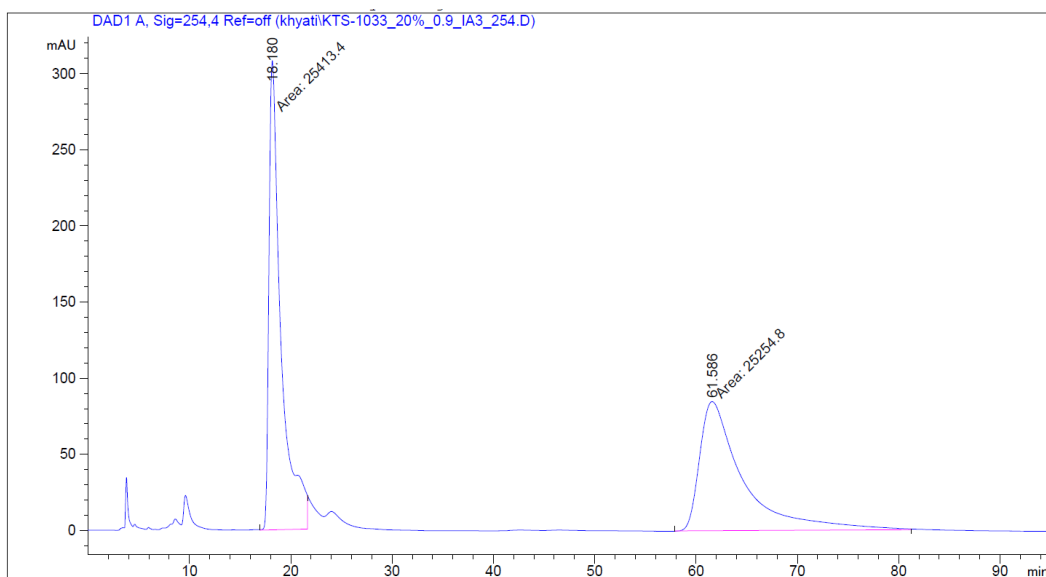

=====  
 Area Percent Report  
 =====

| Peak # | RetTime [min] | Type | Width [min] | Area [mAU*s] | Height [mAU] | Area %  |
|--------|---------------|------|-------------|--------------|--------------|---------|
| 1      | 18.180        | MM   | 1.3746      | 2.54134e4    | 308.12198    | 50.1564 |
| 2      | 61.586        | MM   | 4.9633      | 2.52548e4    | 84.80476     | 49.8436 |

=====  
 \*\*\* End of Report \*\*\*

### HPLC graph of racemic 3aj

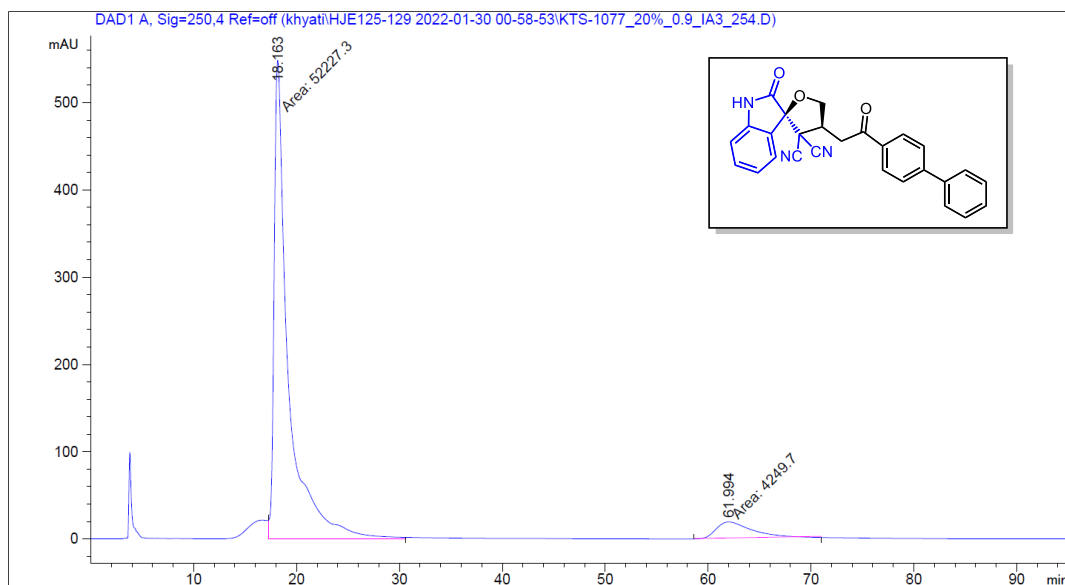

=====  
 Area Percent Report  
 =====

| Peak # | RetTime [min] | Type | Width [min] | Area [mAU*s] | Height [mAU] | Area %  |
|--------|---------------|------|-------------|--------------|--------------|---------|
| 1      | 18.163        | MM   | 1.5874      | 5.22273e4    | 548.33545    | 92.4754 |
| 2      | 61.994        | MM   | 3.8472      | 4249.69629   | 18.41032     | 7.5246  |

=====  
 \*\*\* End of Report \*\*\*

### HPLC graph of enantioenriched 3aj



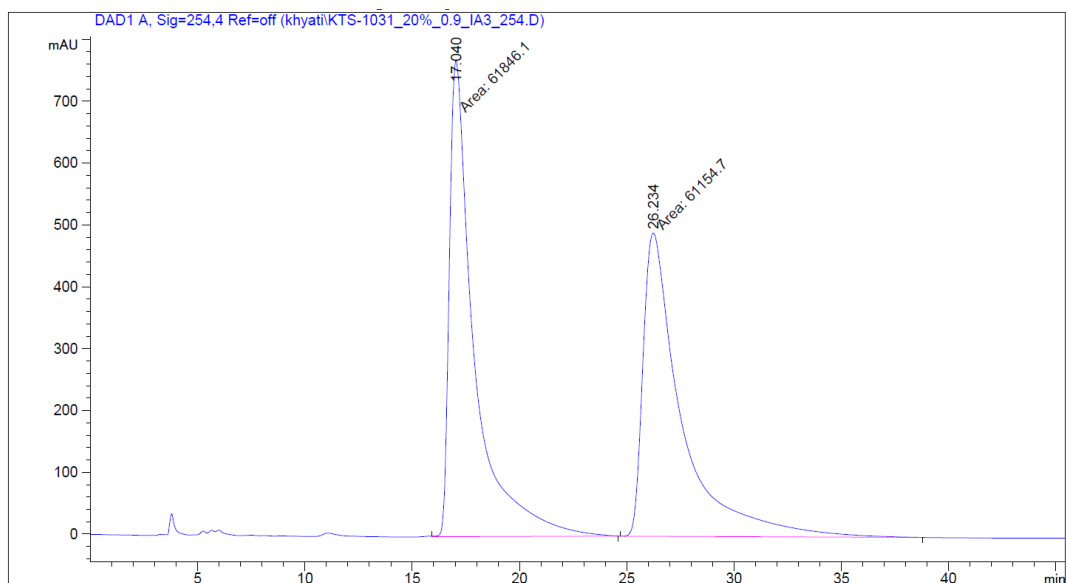

=====  
 Area Percent Report  
 =====

| Peak # | RetTime [min] | Type | Width [min] | Area [mAU*s] | Height [mAU] | Area %  |
|--------|---------------|------|-------------|--------------|--------------|---------|
| 1      | 17.040        | MM   | 1.3392      | 6.18461e4    | 769.68719    | 50.2810 |
| 2      | 26.234        | MM   | 2.0775      | 6.11547e4    | 490.60025    | 49.7190 |

=====  
 \*\*\* End of Report \*\*\*

### HPLC graph of racemic **3ak**

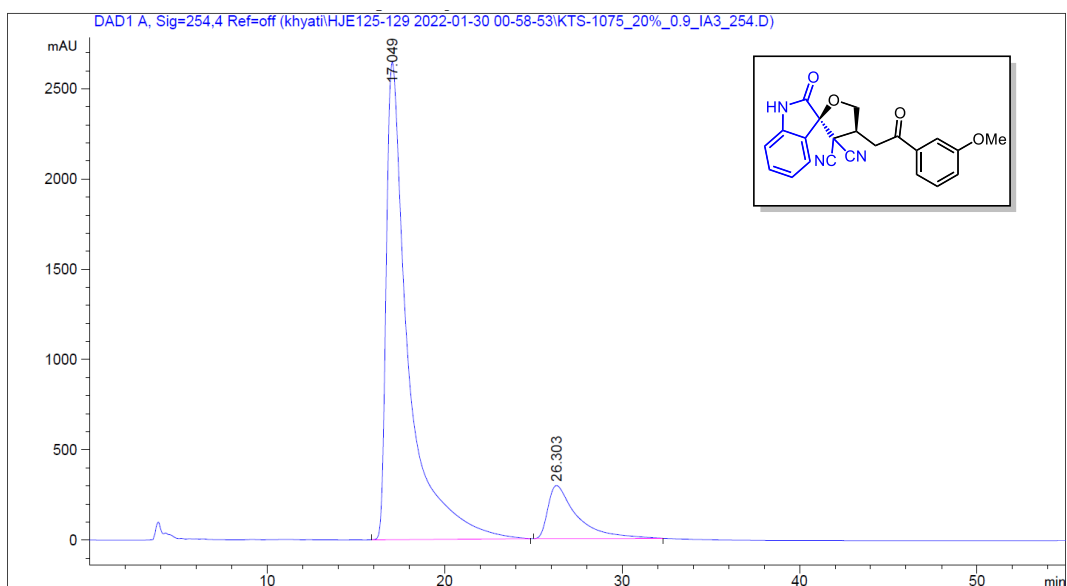

=====  
 Area Percent Report  
 =====

| Peak # | RetTime [min] | Type | Width [min] | Area [mAU*s] | Height [mAU] | Area %  |
|--------|---------------|------|-------------|--------------|--------------|---------|
| 1      | 17.049        | BB   | 1.1971      | 2.26657e5    | 2646.68945   | 87.1375 |
| 2      | 26.303        | BB   | 1.6284      | 3.34572e4    | 293.84677    | 12.8625 |

=====  
 \*\*\* End of Report \*\*\*

### HPLC graph of enantioenriched **3ak**

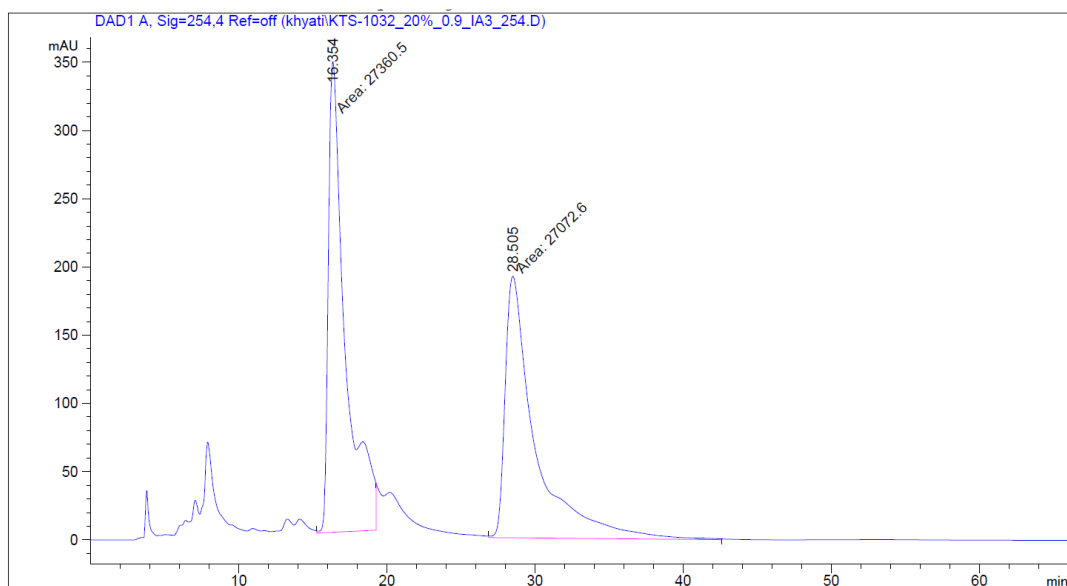

=====  
 Area Percent Report  
 =====

| Peak # | RetTime [min] | Type | Width [min] | Area [mAU*s] | Height [mAU] | Area %  |
|--------|---------------|------|-------------|--------------|--------------|---------|
| 1      | 16.354        | MM   | 1.3222      | 2.73605e4    | 344.89081    | 50.2645 |
| 2      | 28.505        | MM   | 2.3541      | 2.70726e4    | 191.67010    | 49.7355 |

=====  
 \*\*\* End of Report \*\*\*

### HPLC graph of racemic **3a**

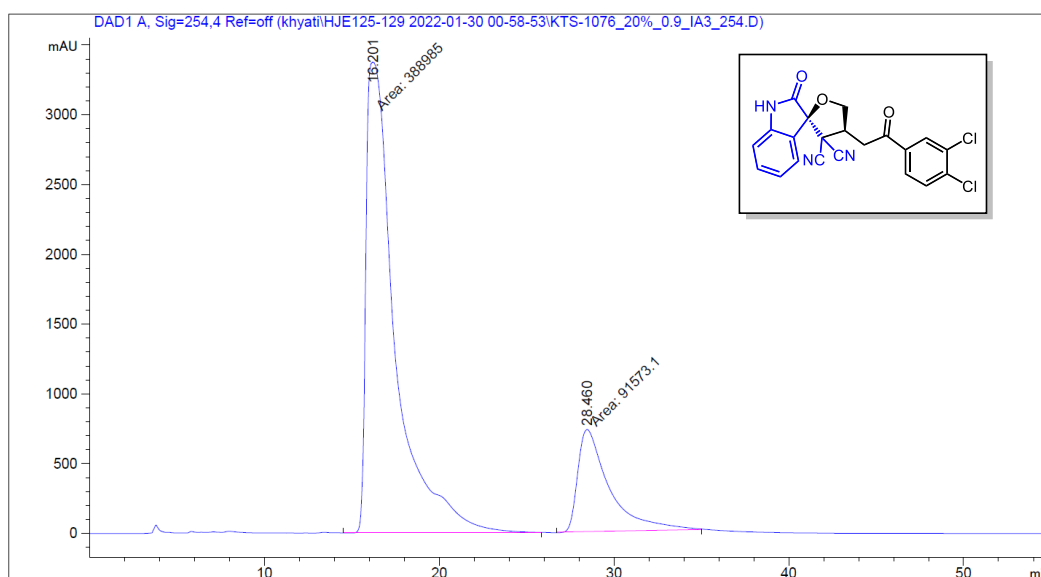

=====  
 Area Percent Report  
 =====

| Peak # | RetTime [min] | Type | Width [min] | Area [mAU*s] | Height [mAU] | Area %  |
|--------|---------------|------|-------------|--------------|--------------|---------|
| 1      | 16.201        | MM   | 1.9217      | 3.88985e5    | 3373.69116   | 80.9444 |
| 2      | 28.460        | MM   | 2.0878      | 9.15731e4    | 731.00385    | 19.0556 |

=====  
 \*\*\* End of Report \*\*\*

### HPLC graph of enantioenriched **3a**

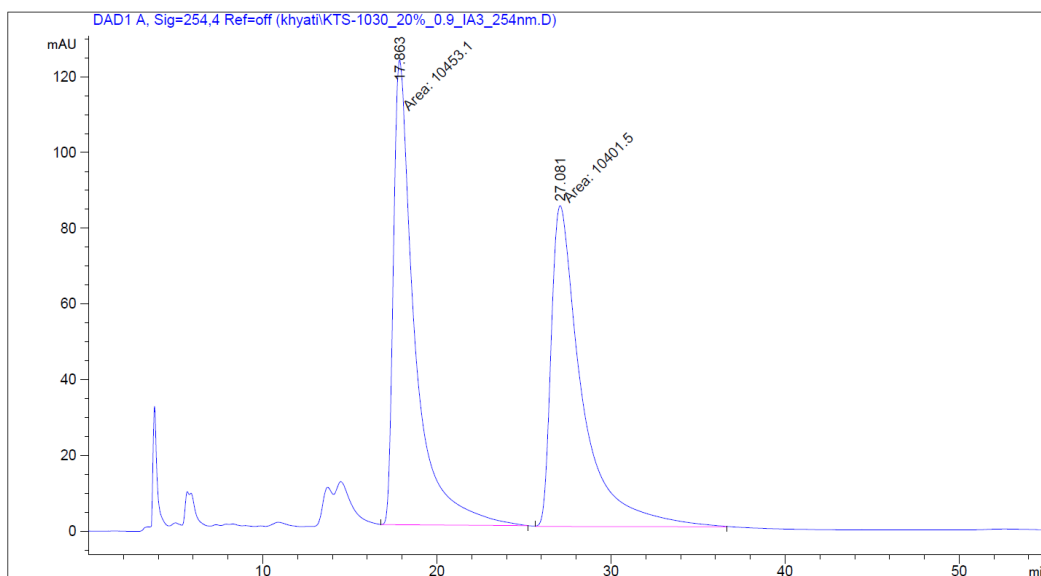

=====  
 Area Percent Report  
 =====

| Peak # | RetTime [min] | Type | Width [min] | Area [mAU*s] | Height [mAU] | Area %  |
|--------|---------------|------|-------------|--------------|--------------|---------|
| 1      | 17.863        | MM   | 1.4193      | 1.04531e4    | 122.75302    | 50.1237 |
| 2      | 27.081        | MM   | 2.0461      | 1.04015e4    | 84.72681     | 49.8763 |

=====  
 \*\*\* End of Report \*\*\*

### HPLC graph of racemic **3am**

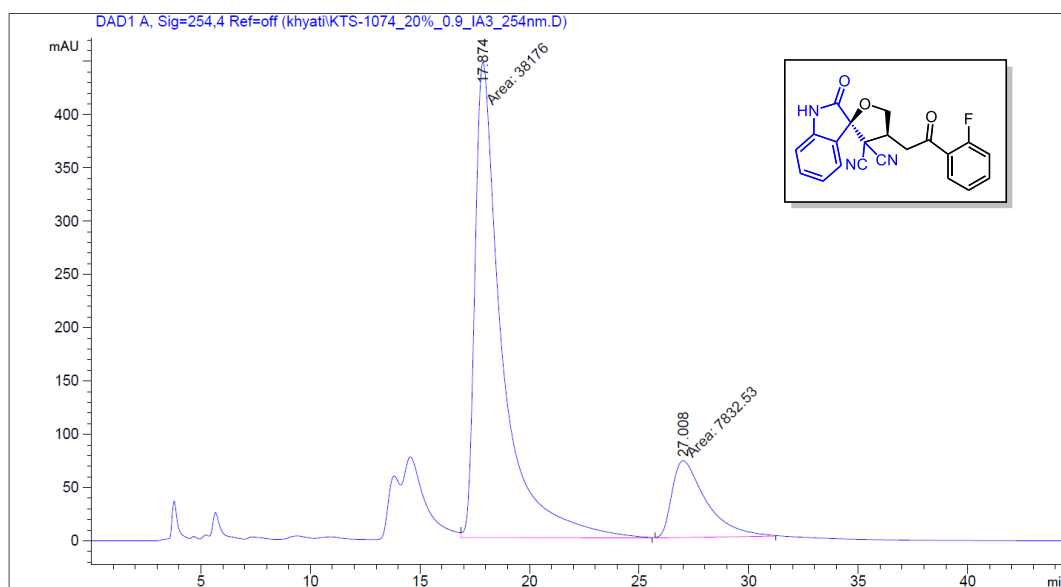

=====  
 Area Percent Report  
 =====

| Peak # | RetTime [min] | Type | Width [min] | Area [mAU*s] | Height [mAU] | Area %  |
|--------|---------------|------|-------------|--------------|--------------|---------|
| 1      | 17.874        | MM   | 1.4267      | 3.81760e4    | 445.98090    | 82.9759 |
| 2      | 27.008        | MM   | 1.8121      | 7832.52881   | 72.03979     | 17.0241 |

=====  
 \*\*\* End of Report \*\*\*

### HPLC graph of enantioenriched **3am**

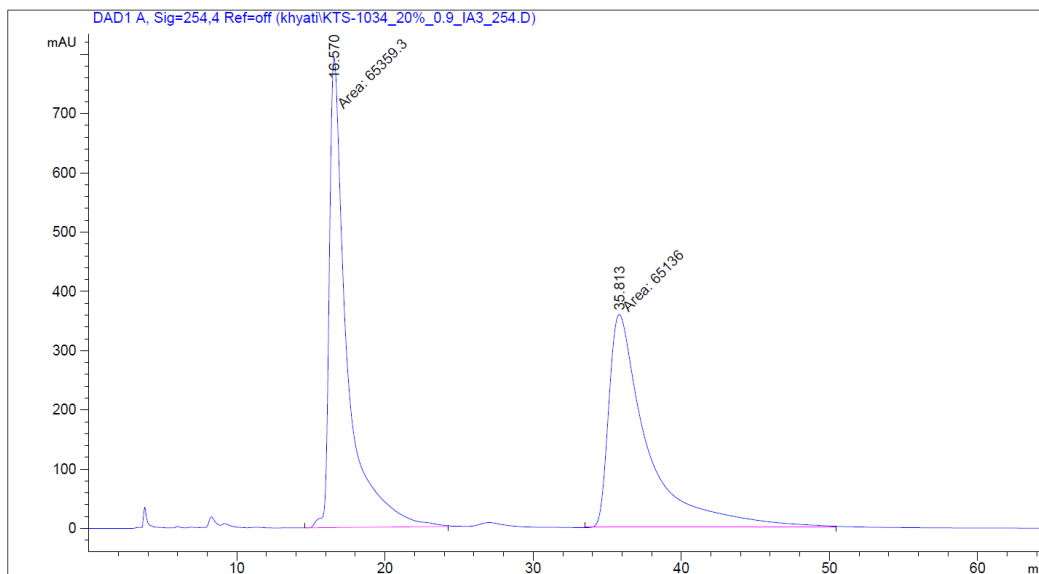

=====  
 Area Percent Report  
 =====

| Peak # | RetTime [min] | Type | Width [min] | Area [mAU*s] | Height [mAU] | Area %  |
|--------|---------------|------|-------------|--------------|--------------|---------|
| 1      | 16.570        | MM   | 1.3741      | 6.53593e4    | 792.77563    | 50.0856 |
| 2      | 35.813        | MM   | 3.0242      | 6.51360e4    | 358.96573    | 49.9144 |

=====  
 \*\*\* End of Report \*\*\*

### HPLC graph of racemic **3an**

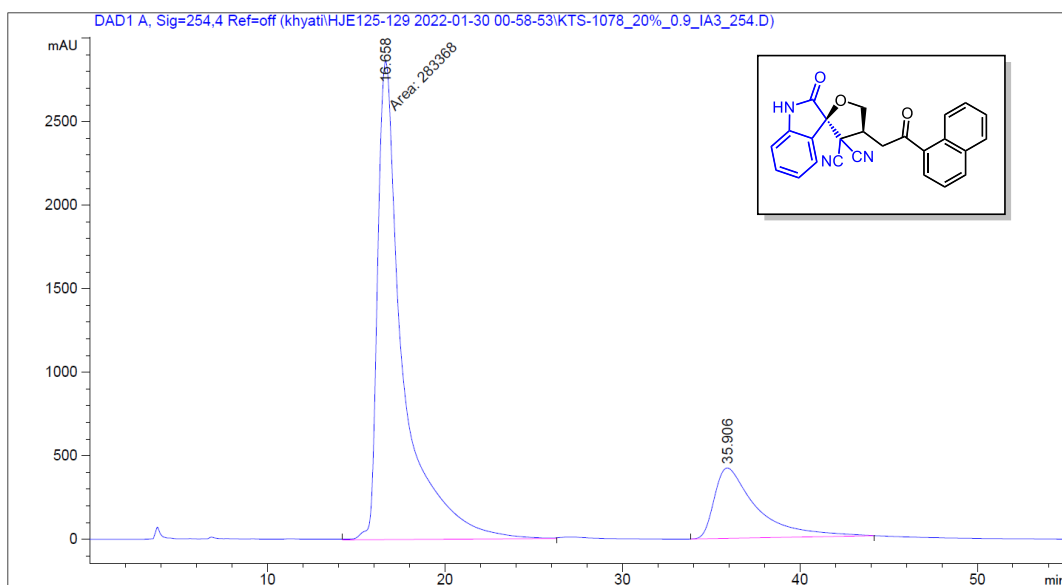

=====  
 Area Percent Report  
 =====

| Peak # | RetTime [min] | Type | Width [min] | Area [mAU*s] | Height [mAU] | Area %  |
|--------|---------------|------|-------------|--------------|--------------|---------|
| 1      | 16.658        | MM   | 1.6499      | 2.83368e5    | 2862.55249   | 80.1865 |
| 2      | 35.906        | BB   | 2.3699      | 7.00180e4    | 421.09830    | 19.8135 |

=====  
 \*\*\* End of Report \*\*\*

### HPLC graph of enantioenriched **3an**

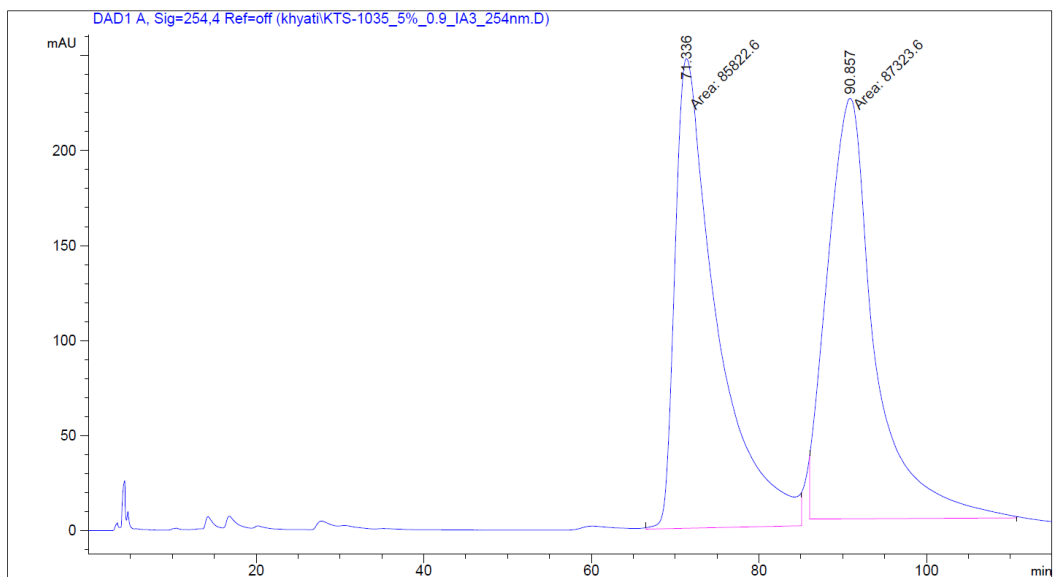

=====  
 Area Percent Report  
 =====

| Peak # | RetTime [min] | Type | Width [min] | Area [mAU*s] | Height [mAU] | Area %  |
|--------|---------------|------|-------------|--------------|--------------|---------|
| 1      | 71.336        | MM   | 5.7904      | 8.58226e4    | 247.02734    | 49.5666 |
| 2      | 90.857        | MM   | 6.5822      | 8.73236e4    | 221.10945    | 50.4334 |

=====  
 \*\*\* End of Report \*\*\*

HPLC graph of racemic **3ao**

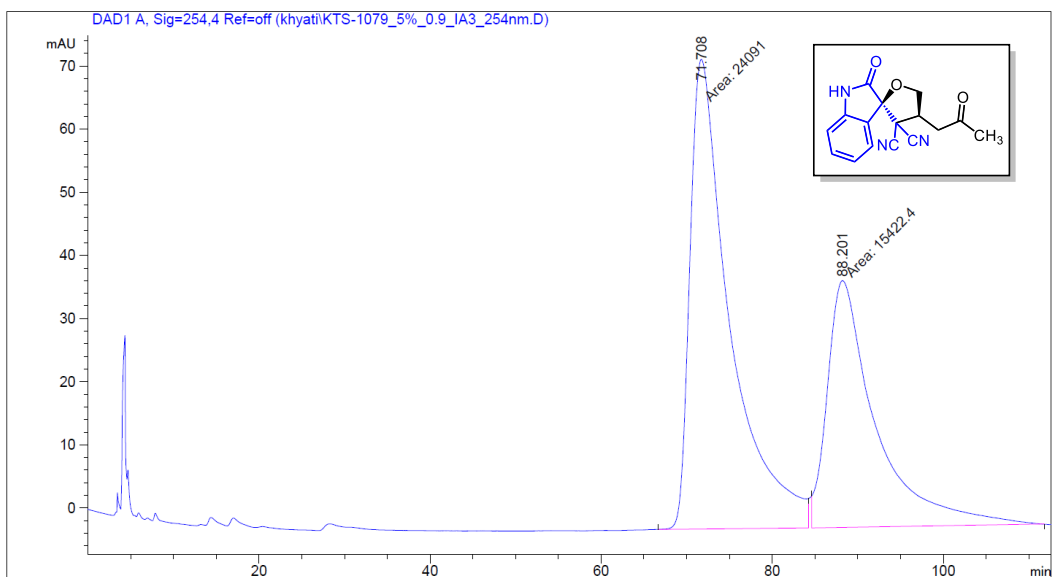

=====  
 Area Percent Report  
 =====

| Peak # | RetTime [min] | Type | Width [min] | Area [mAU*s] | Height [mAU] | Area %  |
|--------|---------------|------|-------------|--------------|--------------|---------|
| 1      | 71.708        | MM   | 5.3967      | 2.40910e4    | 74.40009     | 60.9692 |
| 2      | 88.201        | MM   | 6.5781      | 1.54224e4    | 39.07525     | 39.0308 |

=====  
 \*\*\* End of Report \*\*\*

HPLC graph of enantioenriched **3ao**

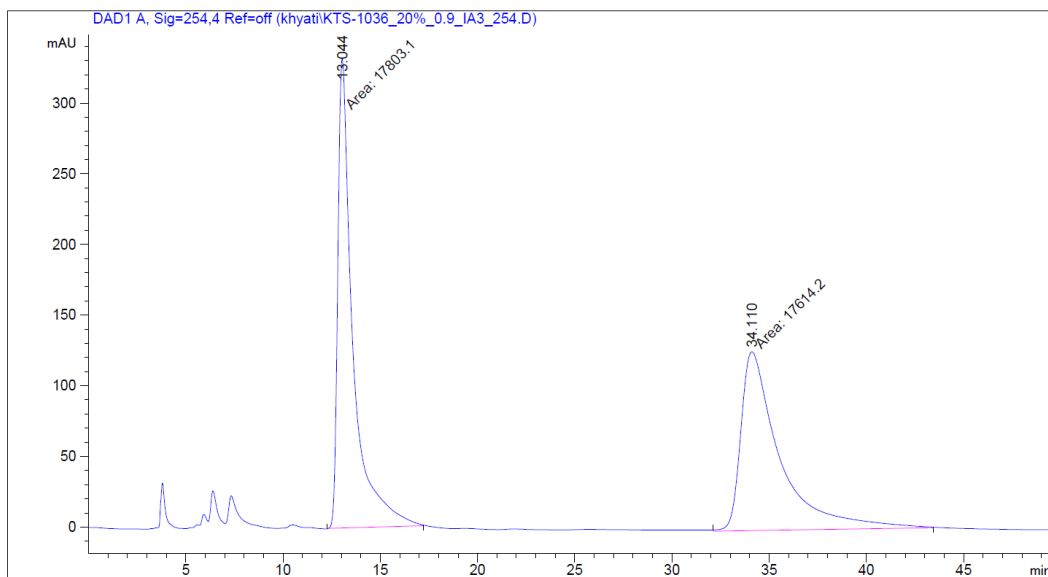

=====  
Area Percent Report  
=====

| Peak # | RetTime [min] | Type | Width [min] | Area [mAU*s] | Height [mAU] | Area %  |
|--------|---------------|------|-------------|--------------|--------------|---------|
| 1      | 13.044        | MM   | 0.8936      | 1.78031e4    | 332.06311    | 50.2667 |
| 2      | 34.110        | MM   | 2.3203      | 1.76142e4    | 126.52483    | 49.7333 |

=====  
\*\*\* End of Report \*\*\*

### HPLC graph of racemic **3ba**

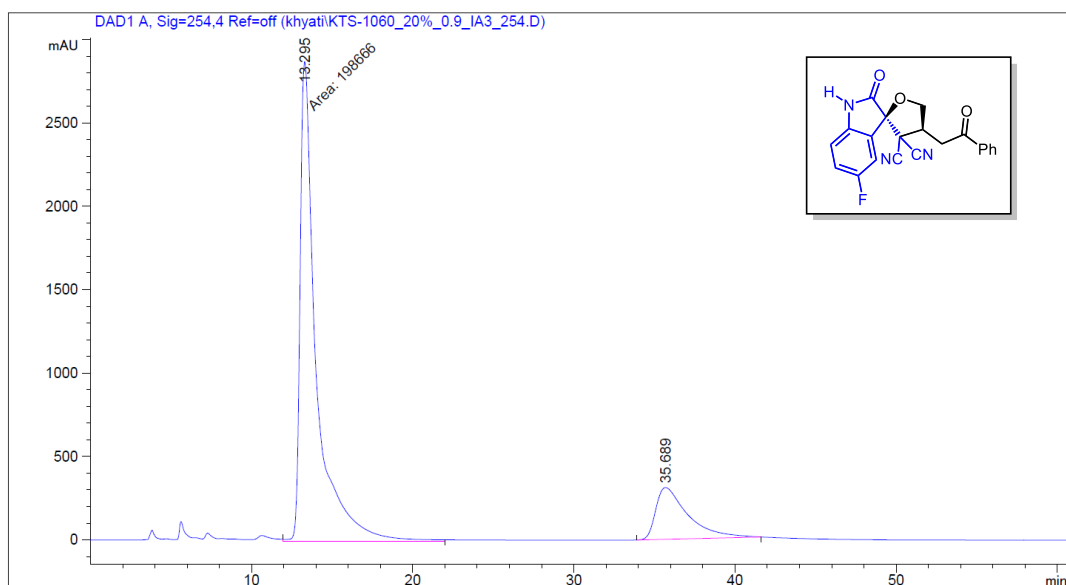

=====  
Area Percent Report  
=====

| Peak # | RetTime [min] | Type | Width [min] | Area [mAU*s] | Height [mAU] | Area %  |
|--------|---------------|------|-------------|--------------|--------------|---------|
| 1      | 13.295        | MM   | 1.1520      | 1.98666e5    | 2874.13843   | 82.1714 |
| 2      | 35.689        | BB   | 1.9994      | 4.31042e4    | 310.54001    | 17.8286 |

=====  
\*\*\* End of Report \*\*\*

### HPLC graph of enantioenriched **3ba**

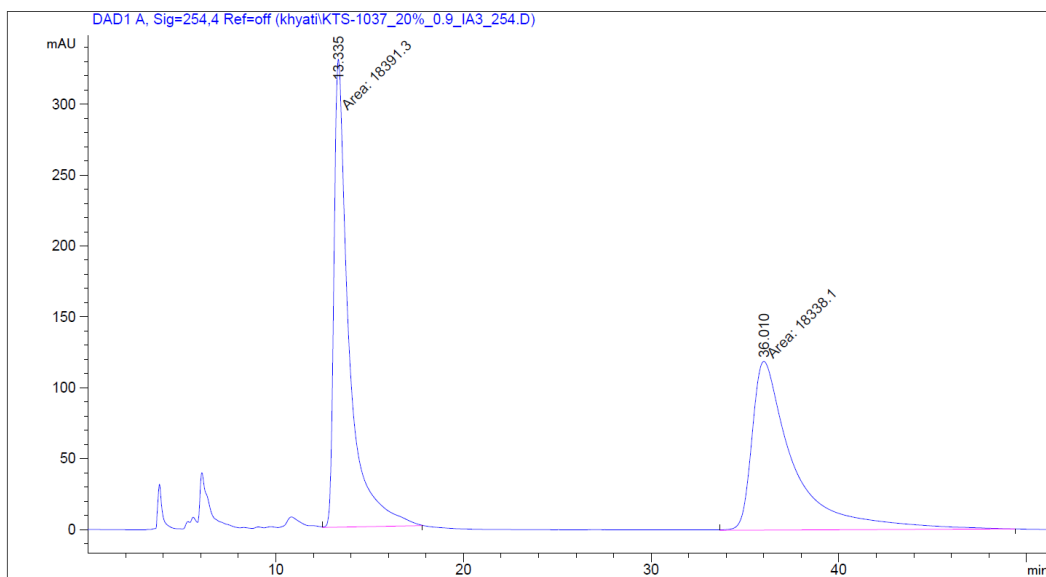

=====  
 Area Percent Report  
 =====

| Peak # | RetTime [min] | Type | Width [min] | Area [mAU*s] | Height [mAU] | Area %  |
|--------|---------------|------|-------------|--------------|--------------|---------|
| 1      | 13.335        | MM   | 0.9287      | 1.83913e4    | 330.06714    | 50.0724 |
| 2      | 36.010        | MM   | 2.5687      | 1.83381e4    | 118.98417    | 49.9276 |

=====  
 \*\*\* End of Report \*\*\*

### HPLC graph of racemic **3ca**

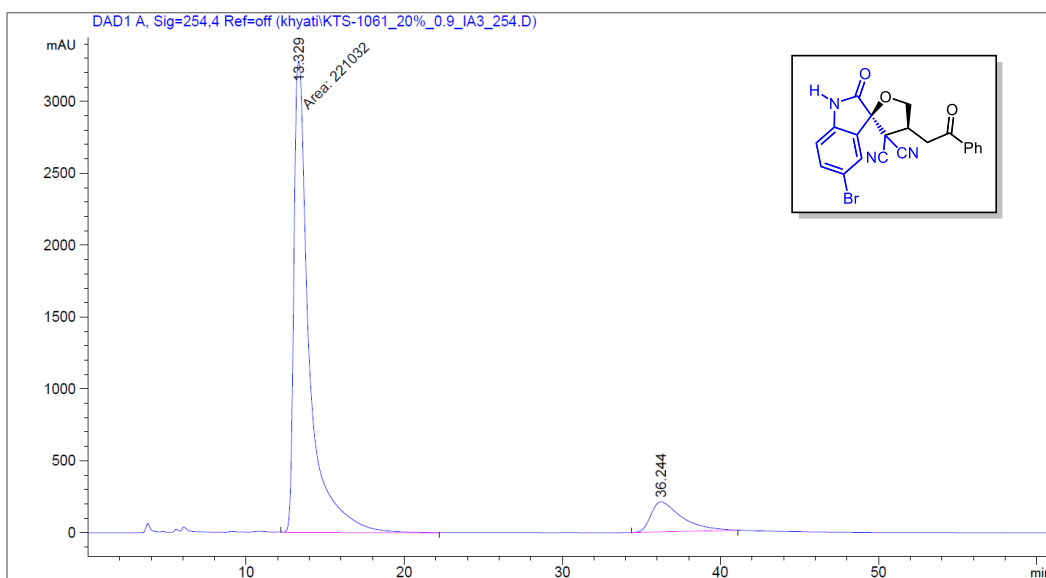

=====  
 Area Percent Report  
 =====

| Peak # | RetTime [min] | Type | Width [min] | Area [mAU*s] | Height [mAU] | Area %  |
|--------|---------------|------|-------------|--------------|--------------|---------|
| 1      | 13.329        | MM   | 1.1234      | 2.21032e5    | 3279.14307   | 88.6286 |
| 2      | 36.244        | BB   | 1.9702      | 2.83592e4    | 209.11510    | 11.3714 |

=====  
 \*\*\* End of Report \*\*\*

### HPLC graph of enantioenriched **3ca**

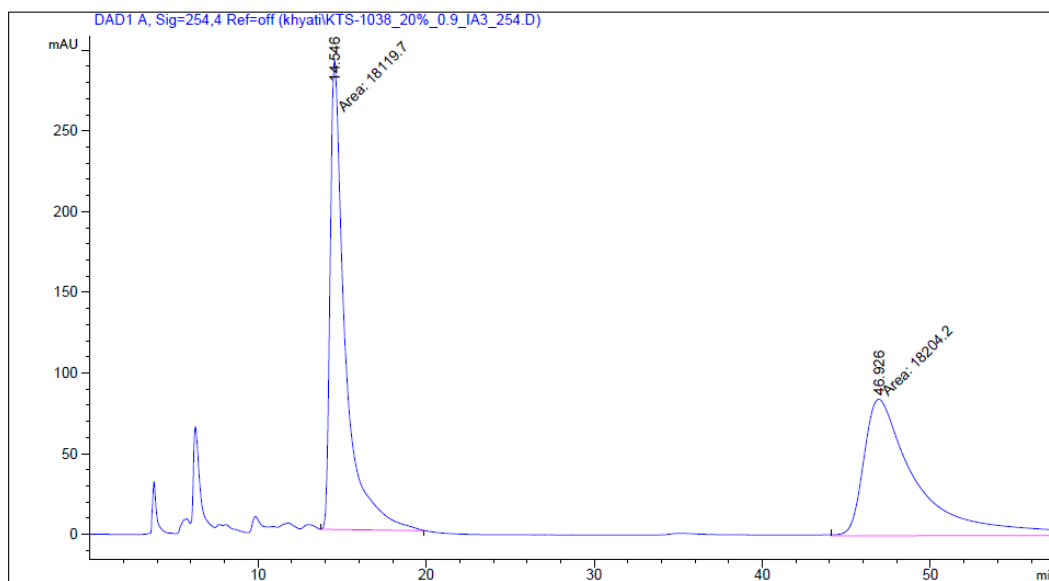

=====  
 Area Percent Report  
 =====

| Peak # | RetTime [min] | Type | Width [min] | Area [mAU*s] | Height [mAU] | Area %  |
|--------|---------------|------|-------------|--------------|--------------|---------|
| 1      | 14.546        | MM   | 1.0383      | 1.81197e4    | 290.84421    | 49.8836 |
| 2      | 46.926        | MM   | 3.5849      | 1.82042e4    | 84.63439     | 50.1164 |

=====  
 \*\*\* End of Report \*\*\*

HPLC graph of racemic **3da**

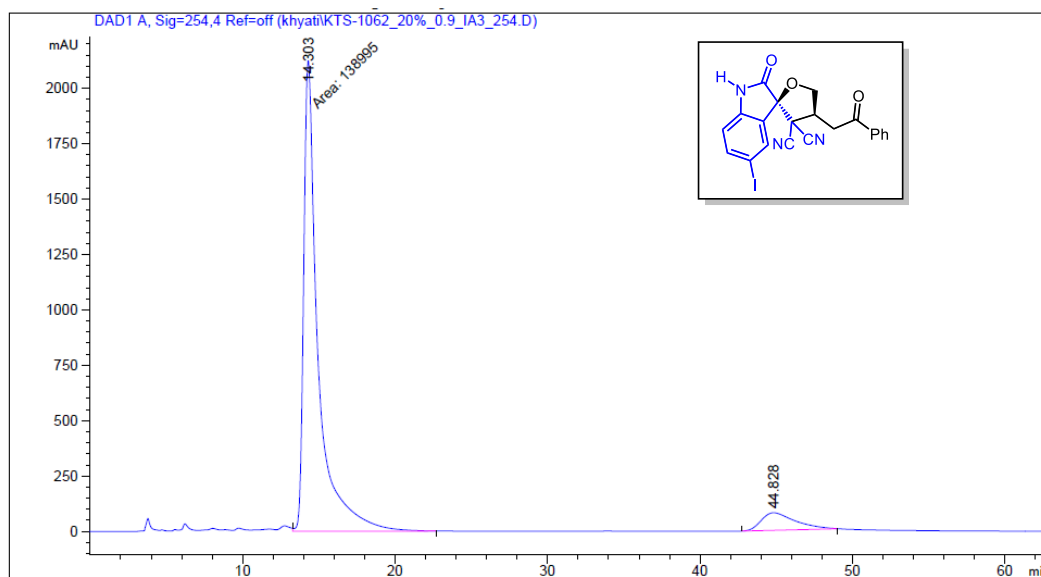

=====  
 Area Percent Report  
 =====

| Peak # | RetTime [min] | Type | Width [min] | Area [mAU*s] | Height [mAU] | Area %  |
|--------|---------------|------|-------------|--------------|--------------|---------|
| 1      | 14.303        | MM   | 1.0906      | 1.38995e5    | 2124.12036   | 91.8873 |
| 2      | 44.828        | BB   | 2.1579      | 1.22719e4    | 79.19316     | 8.1127  |

=====  
 \*\*\* End of Report \*\*\*

HPLC graph of enantioenriched **3da**



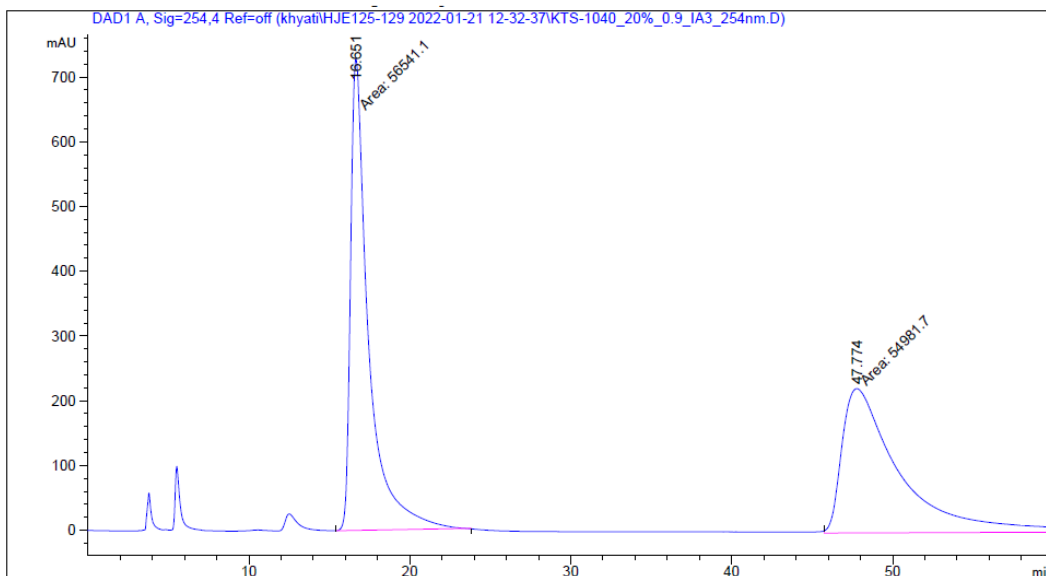

=====  
 Area Percent Report  
 =====

| Peak # | RetTime [min] | Type | Width [min] | Area [mAU*s] | Height [mAU] | Area %  |
|--------|---------------|------|-------------|--------------|--------------|---------|
| 1      | 16.651        | MM   | 1.2936      | 5.65411e4    | 728.49792    | 50.6992 |
| 2      | 47.774        | MM   | 4.1130      | 5.49817e4    | 222.79768    | 49.3008 |

=====  
 \*\*\* End of Report \*\*\*

HPLC graph of racemic **3ea**

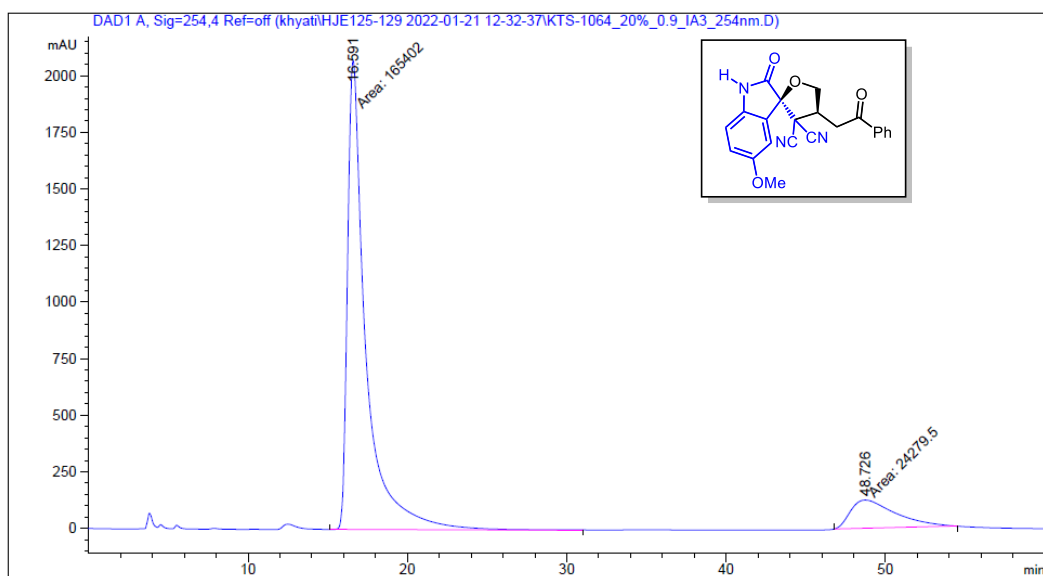

=====  
 Area Percent Report  
 =====

| Peak # | RetTime [min] | Type | Width [min] | Area [mAU*s] | Height [mAU] | Area %  |
|--------|---------------|------|-------------|--------------|--------------|---------|
| 1      | 16.591        | MM   | 1.3309      | 1.65402e5    | 2071.26880   | 87.1999 |
| 2      | 48.726        | MM   | 3.2515      | 2.42795e4    | 124.45325    | 12.8001 |

=====  
 \*\*\* End of Report \*\*\*

HPLC graph of enantioenriched **3ea**

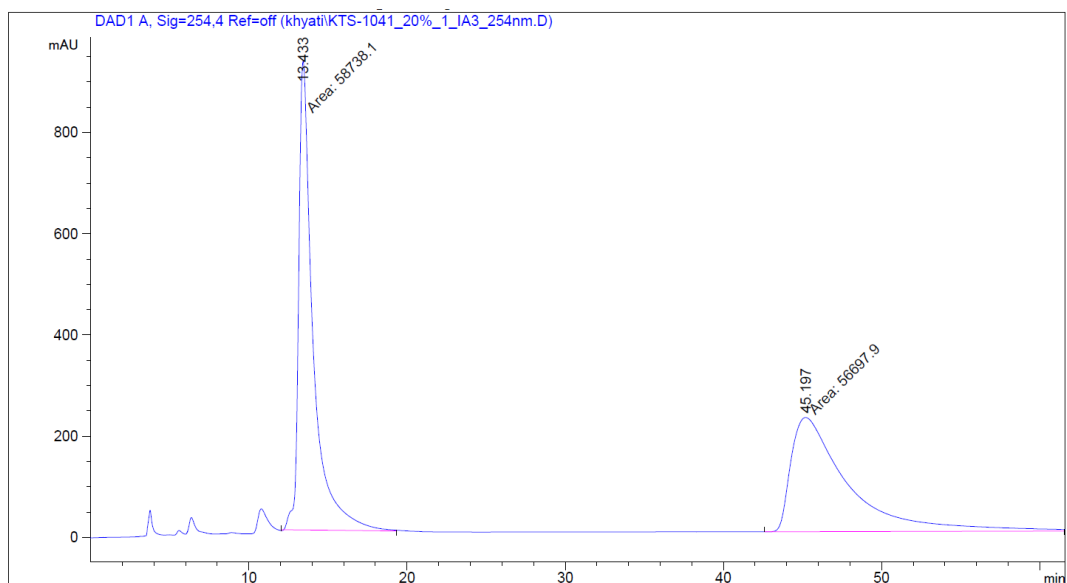

=====  
 Area Percent Report  
 =====

| Peak # | RetTime [min] | Type | Width [min] | Area [mAU*s] | Height [mAU] | Area %  |
|--------|---------------|------|-------------|--------------|--------------|---------|
| 1      | 13.433        | MM   | 1.0562      | 5.87381e4    | 926.86224    | 50.8837 |
| 2      | 45.197        | MM   | 4.1859      | 5.66979e4    | 225.75166    | 49.1163 |

=====  
 \*\*\* End of Report \*\*\*

### HPLC graph of racemic **3fa**

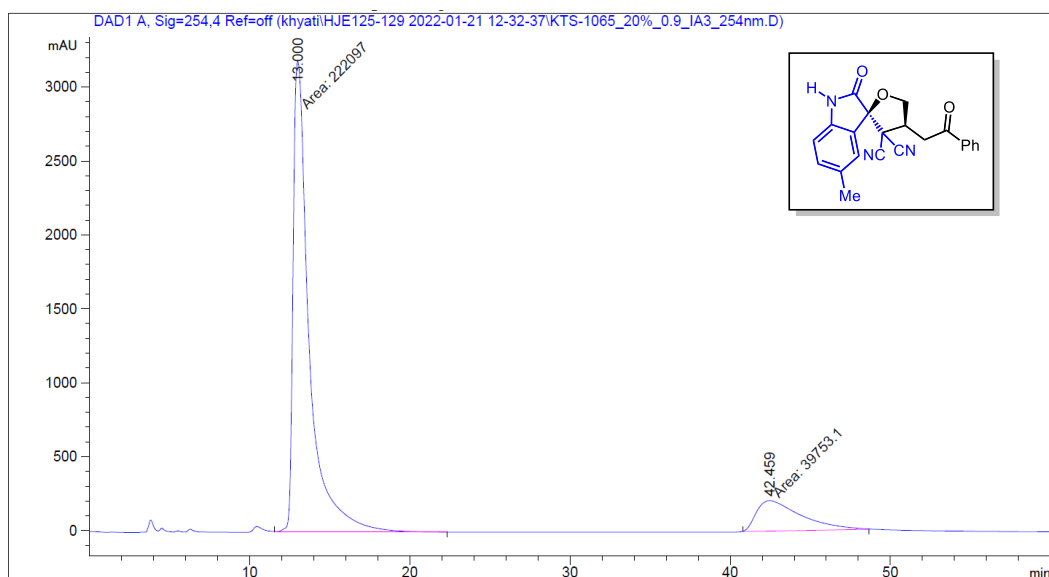

=====  
 Area Percent Report  
 =====

| Peak # | RetTime [min] | Type | Width [min] | Area [mAU*s] | Height [mAU] | Area %  |
|--------|---------------|------|-------------|--------------|--------------|---------|
| 1      | 13.000        | MM   | 1.1620      | 2.22097e5    | 3185.56787   | 84.8184 |
| 2      | 42.459        | MM   | 3.2154      | 3.97531e4    | 206.05502    | 15.1816 |

=====  
 \*\*\* End of Report \*\*\*

### HPLC graph of enantioenriched **3fa**

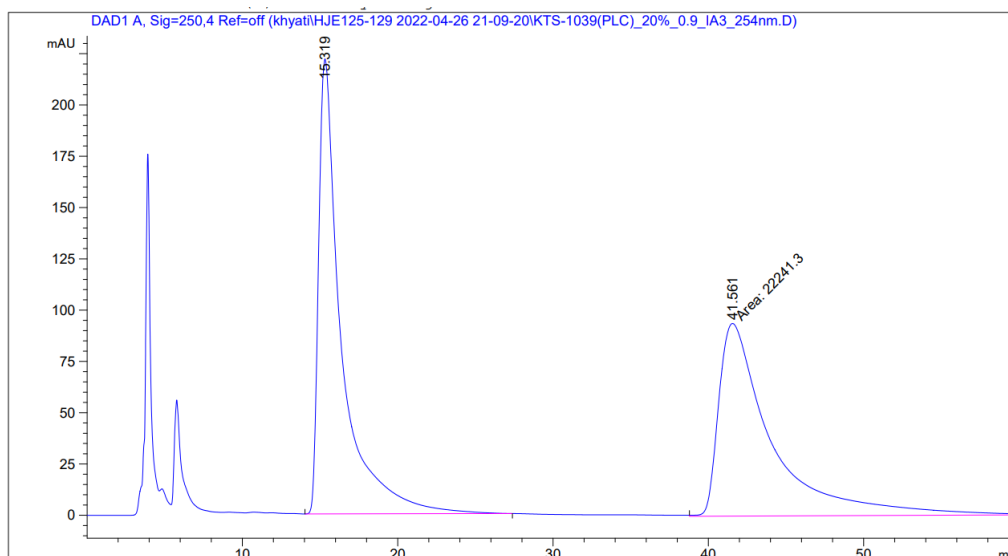

=====  
Area Percent Report  
=====

| Peak # | RetTime [min] | Type | Width [min] | Area [mAU*s] | Height [mAU] | Area %  |
|--------|---------------|------|-------------|--------------|--------------|---------|
| 1      | 15.319        | BB   | 1.4384      | 2.26683e4    | 221.78676    | 50.4754 |
| 2      | 41.561        | MM   | 3.9491      | 2.22413e4    | 93.86544     | 49.5246 |

=====  
\*\*\* End of Report \*\*\*

**HPLC graph of racemic 3ga**

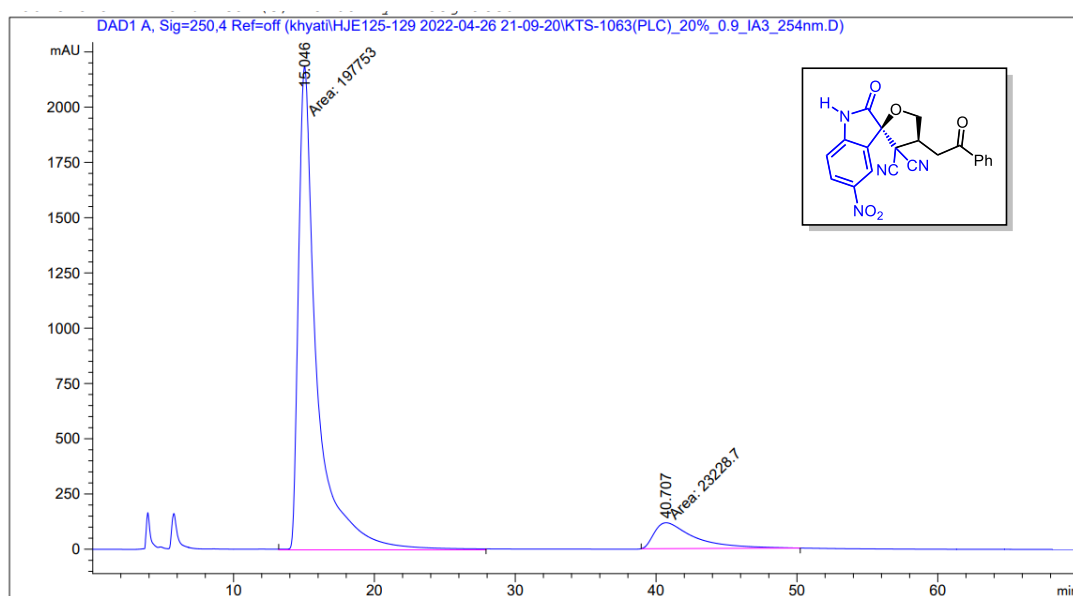

=====  
Area Percent Report  
=====

| Peak # | RetTime [min] | Type | Width [min] | Area [mAU*s] | Height [mAU] | Area %  |
|--------|---------------|------|-------------|--------------|--------------|---------|
| 1      | 15.046        | MM   | 1.5075      | 1.97753e5    | 2186.27441   | 89.4884 |
| 2      | 40.707        | MM   | 3.3052      | 2.32287e4    | 117.13207    | 10.5116 |

=====  
\*\*\* End of Report \*\*\*

**HPLC graph of enantioenriched 3ga**

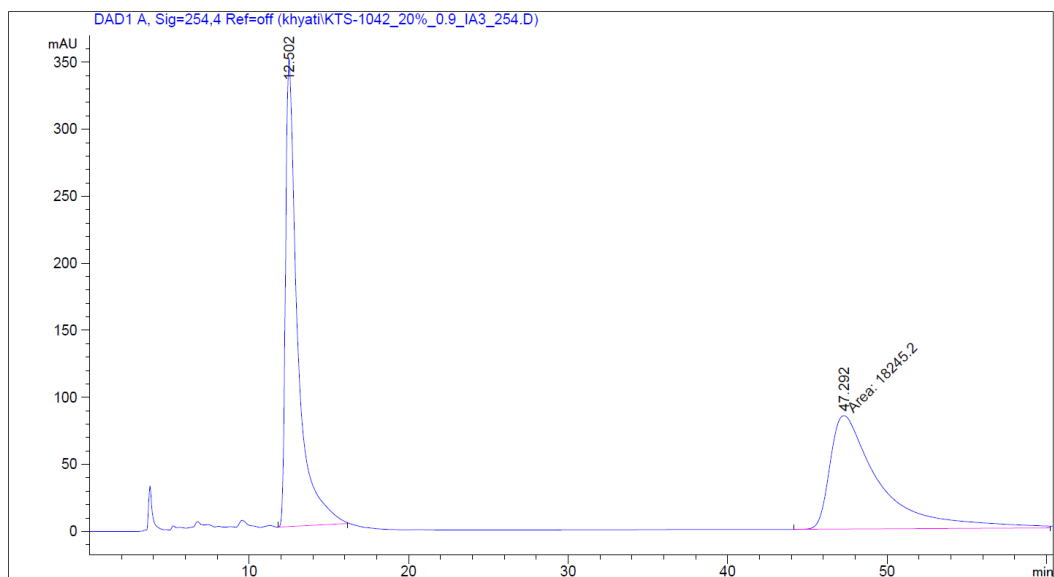

=====  
 Area Percent Report  
 =====

| Peak # | RetTime [min] | Type | Width [min] | Area [mAU*s] | Height [mAU] | Area %  |
|--------|---------------|------|-------------|--------------|--------------|---------|
| 1      | 12.502        | BB   | 0.7527      | 1.83626e4    | 348.50198    | 50.1604 |
| 2      | 47.292        | MM   | 3.5960      | 1.82452e4    | 84.56358     | 49.8396 |

=====  
 \*\*\* End of Report \*\*\*

### HPLC graph of racemic **3ha**

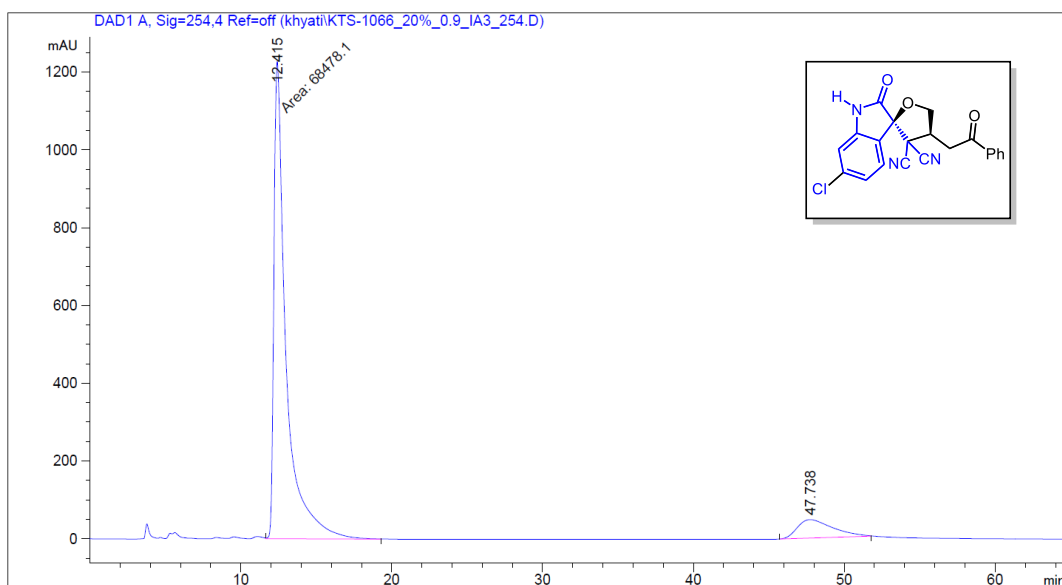

=====  
 Area Percent Report  
 =====

| Peak # | RetTime [min] | Type | Width [min] | Area [mAU*s] | Height [mAU] | Area %  |
|--------|---------------|------|-------------|--------------|--------------|---------|
| 1      | 12.415        | MM   | 0.9298      | 6.84781e4    | 1227.52515   | 89.9264 |
| 2      | 47.738        | BB   | 2.1778      | 7670.96094   | 47.35542     | 10.0736 |

=====  
 \*\*\* End of Report \*\*\*

### HPLC graph of enantioenriched **3ha**

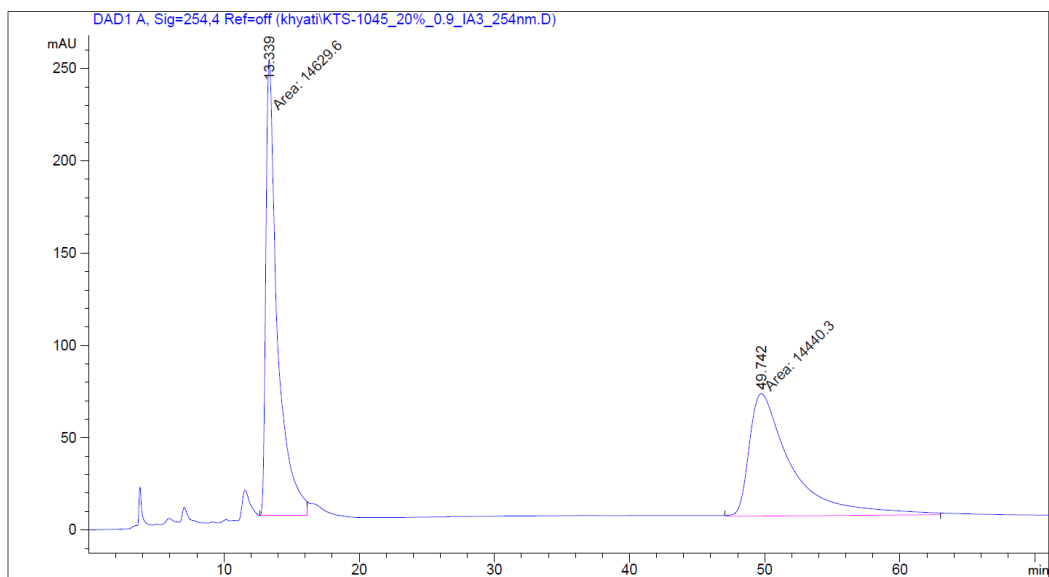

=====  
 Area Percent Report  
 =====

| Peak # | RetTime [min] | Type | Width [min] | Area [mAU*s] | Height [mAU] | Area %  |
|--------|---------------|------|-------------|--------------|--------------|---------|
| 1      | 13.339        | MM   | 0.9864      | 1.46296e4    | 247.19460    | 50.3256 |
| 2      | 49.742        | MM   | 3.6296      | 1.44403e4    | 66.30856     | 49.6744 |

=====  
 \*\*\* End of Report \*\*\*

### HPLC graph of racemic **3ia**

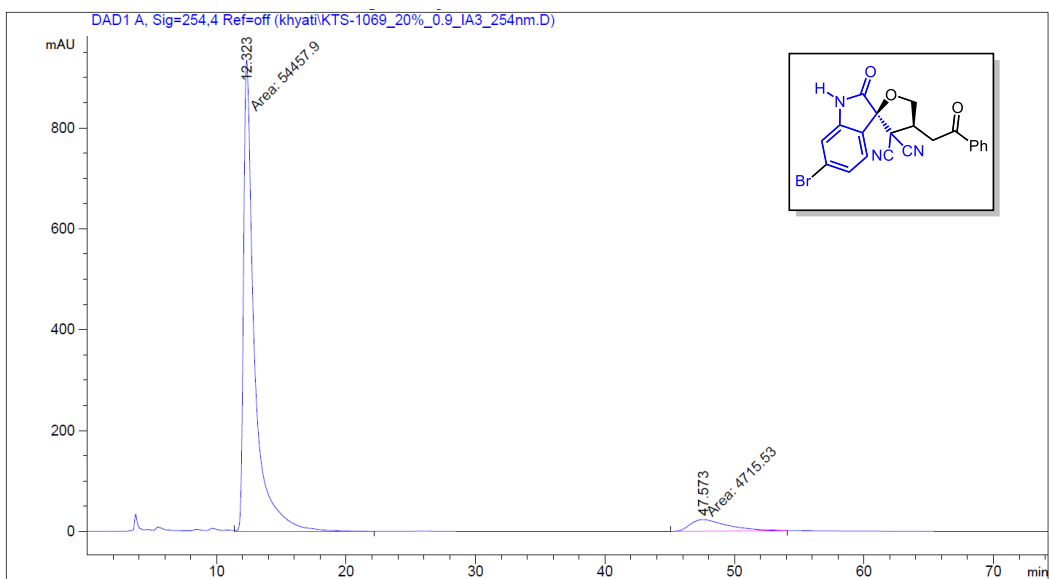

=====  
 Area Percent Report  
 =====

| Peak # | RetTime [min] | Type | Width [min] | Area [mAU*s] | Height [mAU] | Area %  |
|--------|---------------|------|-------------|--------------|--------------|---------|
| 1      | 12.323        | MM   | 0.9708      | 5.44579e4    | 934.94073    | 92.0310 |
| 2      | 47.573        | MM   | 3.3986      | 4715.52734   | 23.12482     | 7.9690  |

=====  
 \*\*\* End of Report \*\*\*

### HPLC graph of enantioenriched **3ia**

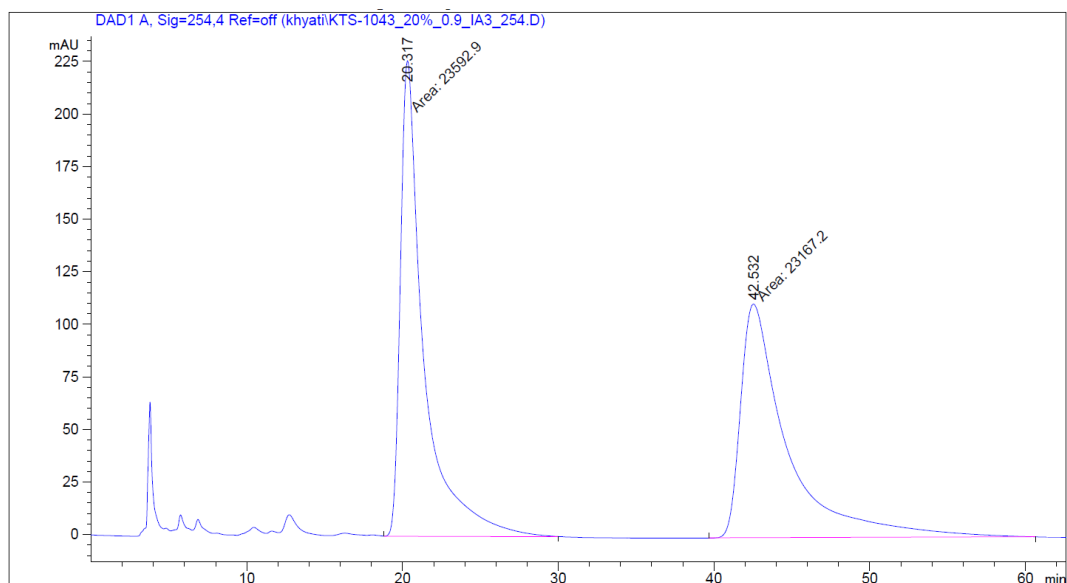

=====  
 Area Percent Report  
 =====

| Peak # | RetTime [min] | Type | Width [min] | Area [mAU*s] | Height [mAU] | Area %  |
|--------|---------------|------|-------------|--------------|--------------|---------|
| 1      | 20.317        | MM   | 1.7386      | 2.35929e4    | 226.17363    | 50.4552 |
| 2      | 42.532        | MM   | 3.4763      | 2.31672e4    | 111.07204    | 49.5448 |

=====  
 \*\*\* End of Report \*\*\*

### HPLC graph of racemic **3ja**

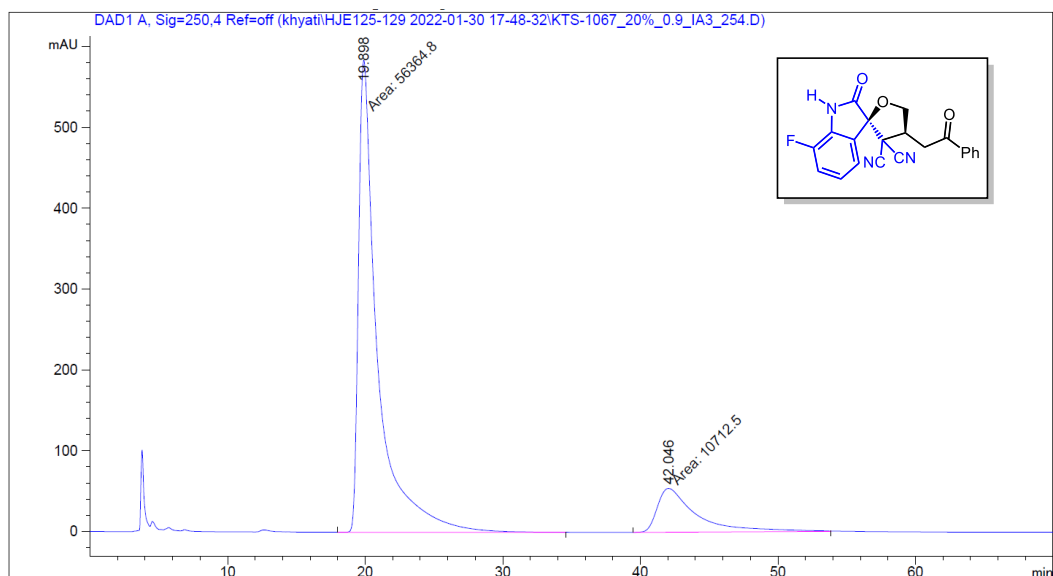

=====  
 Area Percent Report  
 =====

| Peak # | RetTime [min] | Type | Width [min] | Area [mAU*s] | Height [mAU] | Area %  |
|--------|---------------|------|-------------|--------------|--------------|---------|
| 1      | 19.898        | MM   | 1.6084      | 5.63648e4    | 584.05432    | 84.0296 |
| 2      | 42.046        | MM   | 3.2883      | 1.07125e4    | 54.29554     | 15.9704 |

=====  
 \*\*\* End of Report \*\*\*

### HPLC graph of enantioenriched **3ja**

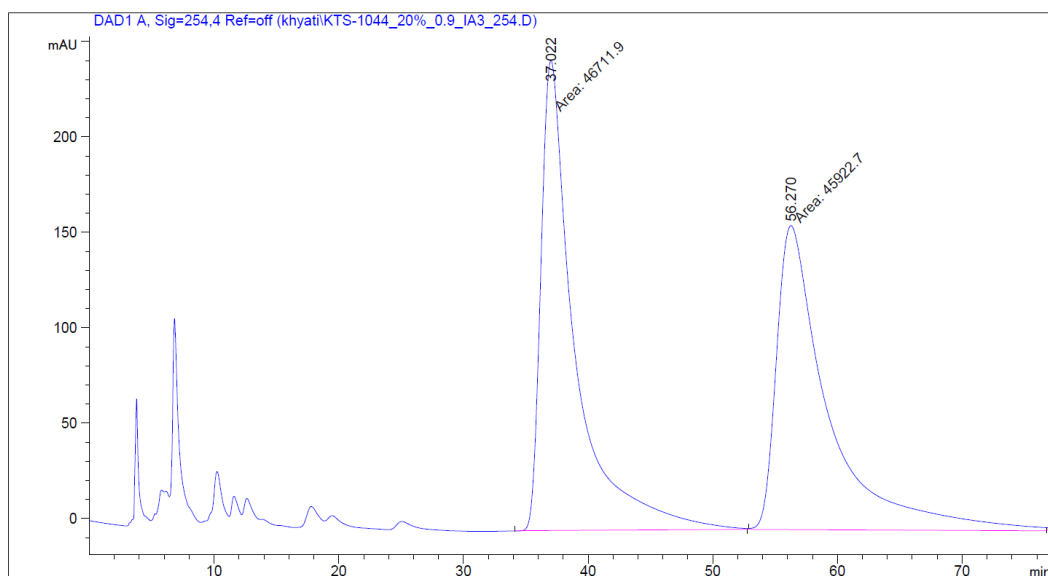

=====  
 Area Percent Report  
 =====

| Peak # | RetTime [min] | Type | Width [min] | Area [mAU*s] | Height [mAU] | Area %  |
|--------|---------------|------|-------------|--------------|--------------|---------|
| 1      | 37.022        | MM   | 3.1619      | 4.67119e4    | 246.22227    | 50.4260 |
| 2      | 56.270        | MM   | 4.8062      | 4.59227e4    | 159.24709    | 49.5740 |

=====  
 \*\*\* End of Report \*\*\*

### HPLC graph of racemic 3ka

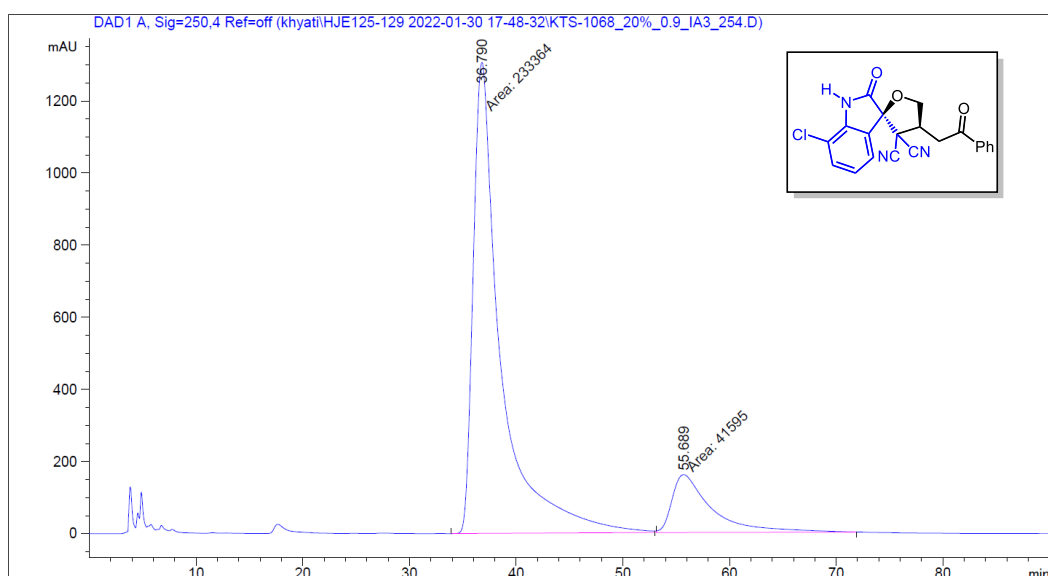

=====  
 Area Percent Report  
 =====

| Peak # | RetTime [min] | Type | Width [min] | Area [mAU*s] | Height [mAU] | Area %  |
|--------|---------------|------|-------------|--------------|--------------|---------|
| 1      | 36.790        | MM   | 2.9778      | 2.33364e5    | 1306.13989   | 84.8723 |
| 2      | 55.689        | MM   | 4.3195      | 4.15950e4    | 160.49490    | 15.1277 |

=====  
 \*\*\* End of Report \*\*\*

### HPLC graph of enantioenriched 3ka

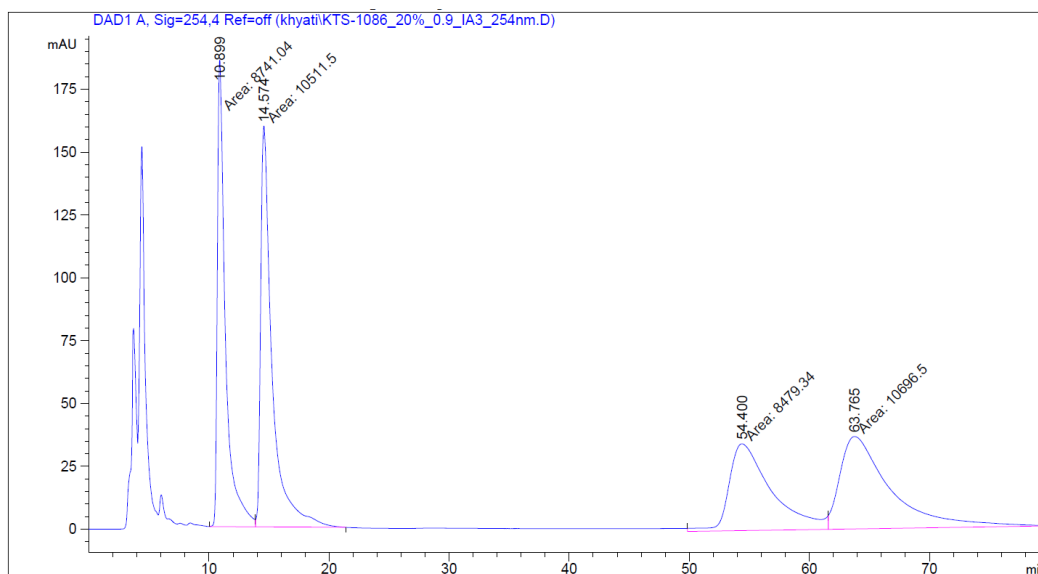

=====  
 Area Percent Report  
 =====

| Peak # | RetTime [min] | Type | Width [min] | Area [mAU*s] | Height [mAU] | Area %  |
|--------|---------------|------|-------------|--------------|--------------|---------|
| 1      | 10.899        | MF   | 0.7845      | 8741.03613   | 185.70013    | 22.7463 |
| 2      | 14.574        | FM   | 1.0988      | 1.05115e4    | 159.44200    | 27.3536 |
| 3      | 54.400        | MF   | 4.0926      | 8479.33594   | 34.53119     | 22.0653 |
| 4      | 63.765        | FM   | 4.8533      | 1.06965e4    | 36.73270     | 27.8348 |

=====  
 \*\*\* End of Report \*\*\*

HPLC graph of racemic **4aa**

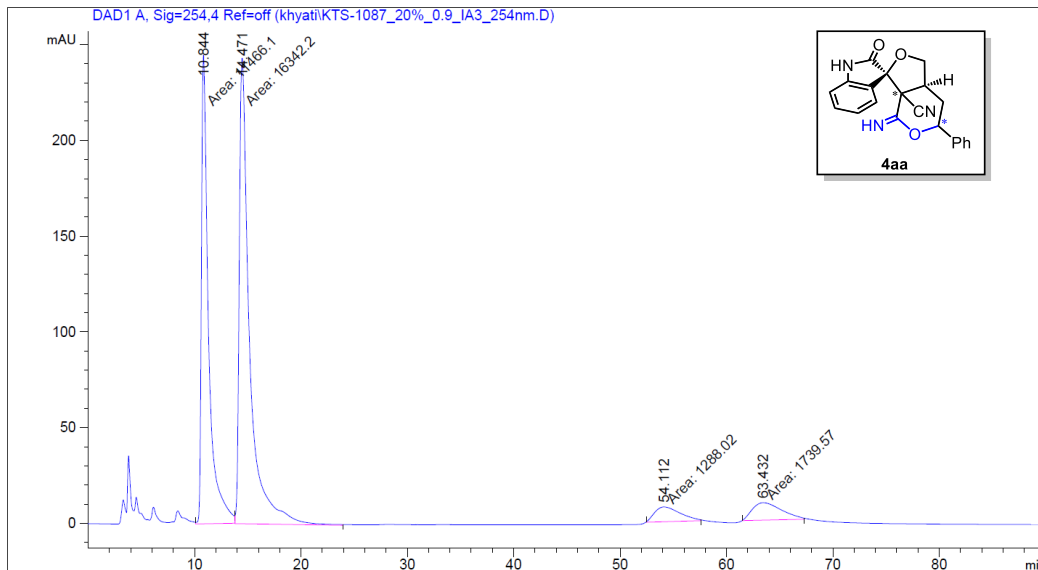

=====  
 Area Percent Report  
 =====

| Peak # | RetTime [min] | Type | Width [min] | Area [mAU*s] | Height [mAU] | Area %  |
|--------|---------------|------|-------------|--------------|--------------|---------|
| 1      | 10.844        | MM   | 0.7809      | 1.14661e4    | 244.72032    | 37.1844 |
| 2      | 14.471        | MM   | 1.1201      | 1.63422e4    | 243.16748    | 52.9972 |
| 3      | 54.112        | MM   | 1.9712      | 1288.01892   | 7.73442      | 4.1770  |
| 4      | 63.432        | MM   | 3.1739      | 1739.57397   | 9.13471      | 5.6414  |

=====  
 \*\*\* End of Report \*\*\*

HPLC graph of enantioenriched **4aa**



**Table 1 Crystal data and structure refinement for 3ia.**

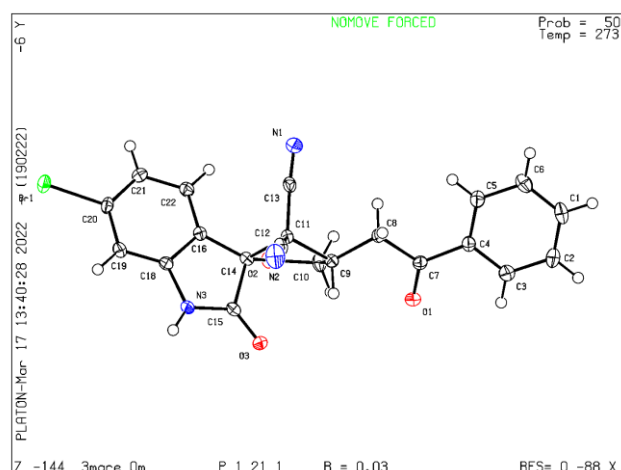

|                                             |                                                                 |
|---------------------------------------------|-----------------------------------------------------------------|
| Identification code                         | 3mare_0m                                                        |
| Empirical formula                           | C <sub>21</sub> H <sub>14</sub> BrN <sub>3</sub> O <sub>3</sub> |
| Formula weight                              | 436.26                                                          |
| Temperature/K                               | 273.15                                                          |
| Crystal system                              | monoclinic                                                      |
| Space group                                 | P2 <sub>1</sub>                                                 |
| a/Å                                         | 10.769(3)                                                       |
| b/Å                                         | 7.643(2)                                                        |
| c/Å                                         | 11.587(4)                                                       |
| α/°                                         | 90                                                              |
| β/°                                         | 99.015(8)                                                       |
| γ/°                                         | 90                                                              |
| Volume/Å <sup>3</sup>                       | 941.9(5)                                                        |
| Z                                           | 2                                                               |
| ρ <sub>calc</sub> /cm <sup>3</sup>          | 1.538                                                           |
| μ/mm <sup>-1</sup>                          | 2.210                                                           |
| F(000)                                      | 440.0                                                           |
| Crystal size/mm <sup>3</sup>                | 0.026 × 0.023 × 0.02                                            |
| Radiation                                   | MoKα (λ = 0.71073)                                              |
| 2θ range for data collection/°              | 6.564 to 56.82                                                  |
| Index ranges                                | -14 ≤ h ≤ 14, -10 ≤ k ≤ 10, -15 ≤ l ≤ 15                        |
| Reflections collected                       | 14049                                                           |
| Independent reflections                     | 4657 [R <sub>int</sub> = 0.0449, R <sub>sigma</sub> = 0.0571]   |
| Data/restraints/parameters                  | 4657/1/253                                                      |
| Goodness-of-fit on F <sup>2</sup>           | 1.005                                                           |
| Final R indexes [I ≥ 2σ (I)]                | R <sub>1</sub> = 0.0270, wR <sub>2</sub> = 0.0618               |
| Final R indexes [all data]                  | R <sub>1</sub> = 0.0283, wR <sub>2</sub> = 0.0623               |
| Largest diff. peak/hole / e Å <sup>-3</sup> | 0.32/-0.26                                                      |
| Flack parameter                             | 0.039(5)                                                        |
